# Supplementary material
Source: PubMed Central journal article supplement (PMC5485375)
Supplement: np7b00189_si_001.pdf [file np7b00189_si_001.pdf]

## Supporting Information

### **Biosynthesis of Fluorinated Peptaibols Using a Site Directed Building Block Incorporation Approach**

José Rivera-Chávez,<sup>†</sup> Huzefa A. Raja,<sup>†</sup> Tyler N. Graf,<sup>†</sup> Joanna E. Burdette,<sup>‡</sup> Cedric J. Pearce,<sup>§</sup> and Nicholas H. Oberlies<sup>†,\*</sup>

<sup>†</sup>Department of Chemistry and Biochemistry, University of North Carolina at Greensboro, P.O. Box. 26170, Greensboro, North Carolina 27412, United States

<sup>‡</sup>Department of Medicinal Chemistry and Pharmacognosy, University of Illinois at Chicago, Illinois 60612, United States

<sup>§</sup>Mycosynthetix, Inc., 505 Meadowlands Drive, Suite 103, Hillsborough, North Carolina 27278, United States

## TABLE OF CONTENTS

|                                                                                                                                                                                                                                                                                                                                                                                                                                                                                                    | Page |
|----------------------------------------------------------------------------------------------------------------------------------------------------------------------------------------------------------------------------------------------------------------------------------------------------------------------------------------------------------------------------------------------------------------------------------------------------------------------------------------------------|------|
| Table of contents                                                                                                                                                                                                                                                                                                                                                                                                                                                                                  | S2   |
| <br>                                                                                                                                                                                                                                                                                                                                                                                                                                                                                               |      |
| <b>Experimental</b>                                                                                                                                                                                                                                                                                                                                                                                                                                                                                |      |
| Fungal strain isolation and identification                                                                                                                                                                                                                                                                                                                                                                                                                                                         | S6   |
| Fermentation, extraction and isolation                                                                                                                                                                                                                                                                                                                                                                                                                                                             | S13  |
| Culture conditions optimization                                                                                                                                                                                                                                                                                                                                                                                                                                                                    | S14  |
| Preparation of <i>ortho</i> -F-Pheol and <i>meta</i> -F-Pheol standards                                                                                                                                                                                                                                                                                                                                                                                                                            | S15  |
| References                                                                                                                                                                                                                                                                                                                                                                                                                                                                                         | S56  |
| <br>                                                                                                                                                                                                                                                                                                                                                                                                                                                                                               |      |
| <b>List of figures</b>                                                                                                                                                                                                                                                                                                                                                                                                                                                                             |      |
| <br>                                                                                                                                                                                                                                                                                                                                                                                                                                                                                               |      |
| <b>Figure S1.</b> Cultures of MSX70741 ( <i>Trichoderma arundinaceum</i> ) grown on Potato Dextrose Agar (PDA) under four different conditions for 21 days. A) Normal PDA. B) PDA supplemented with <i>ortho</i> -F-DL-Phe. C) PDA supplemented with <i>meta</i> -F-DL-Phe. D) PDA supplemented with <i>para</i> -F-DL-Phe.                                                                                                                                                                        | S5   |
| <b>Figure S2.</b> Phylogram of the most likely tree (-lnL = 7876.71) from a RAxML analysis of 52 taxa based on <i>RPB2</i> sequence data (1063 bp). Numbers refer to RAxML bootstrap support values $\geq 70\%$ based on 1000 replicates. Strain MSX70741 was identified as <i>Trichoderma arundinaceum</i> (Bold, highlighted in gray). A 14 d old culture on Potato Dextrose Agar media is shown. Bar indicates nucleotide substitutions per site.                                               | S9   |
| <b>Figure S3.</b> Phylogram of the most likely tree (-lnL = 3836.71) from a RAxML analysis of 41 taxa based on <i>tef-1</i> sequence data (518 bp). Numbers refer to RAxML bootstrap support values $\geq 70\%$ based on 1000 replicates. Strain MSX70741 was identified as <i>Trichoderma arundinaceum</i> (Bold, highlighted in gray). Bar indicates nucleotide substitutions per site.                                                                                                          | S10  |
| <b>Figure S4.</b> <i>Trichoderma arundinaceum</i> (MSX70741). 1. Pustules showing protruding conidiophores. 2. Conidiophore on PDA (Difco). 3. Conidia. 4. 14 d old culture on PDA media; Scale Bars: 1 = 100 $\mu\text{m}$ , 2, 3 = 20 $\mu\text{m}$ .                                                                                                                                                                                                                                            | S11  |
| <b>Figure S5.</b> Phylogram of the most likely tree (-lnL = 9524.67) from a RAxML analysis of 103 taxa based on <i>RPB2</i> sequence data (1060 bp). Numbers refer to RAxML bootstrap support values $\geq 70\%$ based on 1000 replicates. Strain MSX57715 was identified as <i>Trichoderma albolutescens</i> (highlighted in gray). A 14 d old culture on Potato Dextrose Agar media is shown. Bar indicates nucleotide substitutions per site. <i>Protocrea farinosa</i> is used as an outgroup. | S12  |
| <b>Figure S6.</b> Structures of <i>ortho</i> -F-D-pheol (7), <i>ortho</i> -F-L-pheol (8), <i>meta</i> -F-D-pheol (9), and <i>meta</i> -F-L-pheol (10).                                                                                                                                                                                                                                                                                                                                             | S15  |
| <b>Figure S7.</b> Marfey's analysis of standards.                                                                                                                                                                                                                                                                                                                                                                                                                                                  | S17  |
| <b>Figure S8.</b> Marfey's analysis of alamethicin F50 (1).                                                                                                                                                                                                                                                                                                                                                                                                                                        | S17  |
| <b>Figure S9.</b> Marfey's analysis of <i>ortho</i> -F-Pheol alamethicin F50 (2).                                                                                                                                                                                                                                                                                                                                                                                                                  | S18  |
| <b>Figure S10.</b> Marfey's analysis of <i>meta</i> -F-Pheol alamethicin F50 (3).                                                                                                                                                                                                                                                                                                                                                                                                                  | S18  |

|                                                                                                                                                                                                                                                                                                                                                                                                                                                                             |     |
|-----------------------------------------------------------------------------------------------------------------------------------------------------------------------------------------------------------------------------------------------------------------------------------------------------------------------------------------------------------------------------------------------------------------------------------------------------------------------------|-----|
| <b>Figure S11.</b> A) Full scan positive HRESIMS for extracts of MSX70741 cultured in rice and rice supplemented with <i>ortho</i> , <i>meta</i> , and <i>para</i> -F-DL-Phe (from the top to the bottom), indicating the incorporation of <i>ortho</i> and <i>meta</i> -F-Phe into the alamethicin F50 molecule. B) Expansion of region at $m/z$ 1960-1990. C) Expansion of region at $m/z$ 770-800. Diagnostic signals for the incorporation of fluorine have been boxed. | S19 |
| <b>Figure S12.</b> Key HMBC, TOCSY and NOESY correlations for compounds <b>1-3</b> .                                                                                                                                                                                                                                                                                                                                                                                        | S26 |
| <b>Figure S13.</b> A) Full scan positive HRESIMS for compound <b>1</b> . B-F) Expansion of the $[M+3H]^{3+}$ , $y_7^+$ , $[M+2H]^{2+}$ , $b_{13}^+$ , and $[M+H]^+$ ion peaks, respectively.                                                                                                                                                                                                                                                                                | S27 |
| <b>Figure S14.</b> $^1H$ -NMR spectrum of alamethicin F50 ( <b>1</b> ) in $CD_3OH$ (recorded at 700 MHz).                                                                                                                                                                                                                                                                                                                                                                   | S28 |
| <b>Figure S15.</b> $^{13}C$ -NMR spectrum of alamethicin F50 ( <b>1</b> ) in $CD_3OH$ (recorded at 175 MHz).                                                                                                                                                                                                                                                                                                                                                                | S29 |
| <b>Figure S16.</b> $^1H$ - $^1H$ COSY of alamethicin F50 ( <b>1</b> ) in $CD_3OH$ .                                                                                                                                                                                                                                                                                                                                                                                         | S30 |
| <b>Figure S17.</b> $^1H$ - $^1H$ TOCSY of alamethicin F50 ( <b>1</b> ) in $CD_3OH$ .                                                                                                                                                                                                                                                                                                                                                                                        | S31 |
| <b>Figure S18.</b> $^1H$ - $^1H$ NOESY of alamethicin F50 ( <b>1</b> ) in $CD_3OH$ .                                                                                                                                                                                                                                                                                                                                                                                        | S32 |
| <b>Figure S19.</b> $^1H$ - $^{13}C$ HSQC of alamethicin F50 ( <b>1</b> ) in $CD_3OH$ .                                                                                                                                                                                                                                                                                                                                                                                      | S33 |
| <b>Figure S20.</b> $^1H$ - $^{13}C$ HMBC of alamethicin F50 ( <b>1</b> ) in $CD_3OH$ .                                                                                                                                                                                                                                                                                                                                                                                      | S34 |
| <b>Figure S21.</b> A) Full scan positive HRESIMS of <i>ortho</i> -F-Pheol alamethicin F50 ( <b>2</b> ). B-F) Expansion of the $[M+3H]^{3+}$ , $y_7^+$ , $[M+2H]^{2+}$ , $b_{13}^+$ , and $[M+H]^+$ ion peaks, respectively.                                                                                                                                                                                                                                                 | S35 |
| <b>Figure S22.</b> The sequential losses of amino acids for each in-source fragment at $m/z$ 1189.69 (top) and $m/z$ 792.43 generated from the $[M+2H]^{2+}$ ion (bottom) for compound <b>2</b> .                                                                                                                                                                                                                                                                           | S36 |
| <b>Figure S23.</b> $^1H$ -NMR spectrum of <i>ortho</i> -F-Pheol alamethicin F50 ( <b>2</b> ) in $CD_3OH$ (recorded at 700 MHz).                                                                                                                                                                                                                                                                                                                                             | S37 |
| <b>Figure S24.</b> $^{13}C$ -NMR spectrum of <i>ortho</i> -F-Pheol alamethicin F50 ( <b>2</b> ) in $CD_3OH$ (recorded at 175 MHz).                                                                                                                                                                                                                                                                                                                                          | S38 |
| <b>Figure S25.</b> $^1H$ - $^1H$ COSY of <i>ortho</i> -F-Pheol alamethicin F50 ( <b>2</b> ) in $CD_3OH$ .                                                                                                                                                                                                                                                                                                                                                                   | S39 |
| <b>Figure S26.</b> $^1H$ - $^1H$ TOCSY of <i>ortho</i> -F-Pheol alamethicin F50 ( <b>2</b> ) in $CD_3OH$ .                                                                                                                                                                                                                                                                                                                                                                  | S40 |
| <b>Figure S27.</b> $^1H$ - $^1H$ NOESY of <i>ortho</i> -F-Pheol alamethicin F50 ( <b>2</b> ) in $CD_3OH$ .                                                                                                                                                                                                                                                                                                                                                                  | S41 |
| <b>Figure S28.</b> $^1H$ - $^{13}C$ HSQC of <i>ortho</i> -F-Pheol alamethicin F50 ( <b>2</b> ) in $CD_3OH$ .                                                                                                                                                                                                                                                                                                                                                                | S42 |
| <b>Figure S29.</b> $^1H$ - $^{13}C$ HMBC of <i>ortho</i> -F-Pheol alamethicin F50 ( <b>2</b> ) in $CD_3OH$ .                                                                                                                                                                                                                                                                                                                                                                | S43 |
| <b>Figure S30.</b> $^{19}F$ -NMR spectrum of <i>ortho</i> -F-Pheol alamethicin F50 ( <b>2</b> ) in $CD_3OH$ (recorded at 470 MHz).                                                                                                                                                                                                                                                                                                                                          | S44 |
| <b>Figure S31.</b> A) Full scan positive HRESIMS of <i>meta</i> -F-Pheol alamethicin F50 ( <b>3</b> ). B-F) Expansion of the $[M+3H]^{3+}$ , $y_7^+$ , $[M+2H]^{2+}$ , $b_{13}^+$ , and $[M+H]^+$ ion peaks, respectively.                                                                                                                                                                                                                                                  | S45 |
| <b>Figure S32.</b> The sequential losses of amino acids for each in-source fragment at $m/z$ 1189.69 (top) and $m/z$ 792.44 generated from the $[M+2H]^{2+}$ ion (bottom) for compound <b>3</b> .                                                                                                                                                                                                                                                                           | S46 |
| <b>Figure S33.</b> $^1H$ -NMR spectrum of <i>meta</i> -F-Pheol alamethicin F50 ( <b>3</b> ) in $CD_3OH$ (recorded at 700 MHz).                                                                                                                                                                                                                                                                                                                                              | S47 |
| <b>Figure S34.</b> $^{13}C$ -NMR spectrum of <i>meta</i> -F-Pheol alamethicin F50 ( <b>3</b> ) in $CD_3OH$ (recorded at 175 MHz).                                                                                                                                                                                                                                                                                                                                           | S48 |
| <b>Figure S35.</b> $^1H$ - $^1H$ COSY of <i>meta</i> -F-Pheol alamethicin F50 ( <b>3</b> ) in $CD_3OH$ .                                                                                                                                                                                                                                                                                                                                                                    | S49 |
| <b>Figure S36.</b> $^1H$ - $^1H$ TOCSY of <i>meta</i> -F-Pheol alamethicin F50 ( <b>3</b> ) in $CD_3OH$ .                                                                                                                                                                                                                                                                                                                                                                   | S50 |
| <b>Figure S37.</b> $^1H$ - $^1H$ NOESY of <i>meta</i> -F-Pheol alamethicin F50 ( <b>3</b> ) in $CD_3OH$ .                                                                                                                                                                                                                                                                                                                                                                   | S51 |
| <b>Figure S38.</b> $^1H$ - $^{13}C$ HSQC of <i>meta</i> -F-Pheol alamethicin F50 ( <b>3</b> ) in $CD_3OH$ .                                                                                                                                                                                                                                                                                                                                                                 | S52 |
| <b>Figure S39.</b> $^1H$ - $^{13}C$ HMBC of <i>meta</i> -F-Pheol alamethicin F50 ( <b>3</b> ) in $CD_3OH$ .                                                                                                                                                                                                                                                                                                                                                                 | S53 |

|                                                                                                                                                                                        |     |
|----------------------------------------------------------------------------------------------------------------------------------------------------------------------------------------|-----|
| <b>Figure S40.</b> $^{19}\text{F}$ -NMR spectrum for <i>meta</i> -F-Pheol alamethicin F50 ( <b>3</b> ) in $\text{CD}_3\text{OH}$ (recorded at 470 MHz).                                | S54 |
| <b>Figure S41.</b> Comparison of the $^1\text{H}$ -NMR spectra for compounds <b>1</b> (maroon), <b>2</b> (green), and <b>3</b> (blue). Recorded at 700 MHz in $\text{CD}_3\text{OH}$ . | S55 |

#### List of tables

|                                                                                                                                                                                                                                          |     |
|------------------------------------------------------------------------------------------------------------------------------------------------------------------------------------------------------------------------------------------|-----|
| <b>Table S1.</b> PCR protocols and primers used for identification of <i>Trichoderma</i> spp.                                                                                                                                            | S7  |
| <b>Table S2.</b> NMR data for D and L <i>ortho</i> and <i>meta</i> -F-Phenylalanine ( <b>8</b> and <b>9</b> ). Data recorded in $\text{CD}_3\text{OH}$ . $^1\text{H}$ (500 MHz), $^{13}\text{C}$ (125 MHz) and $^{19}\text{F}$ (470 MHz) | S16 |
| <b>Table S3.</b> NMR data for alamethicin F50 ( <b>1</b> ). Data recorded in $\text{CD}_3\text{OH}$ . $^1\text{H}$ (700 MHz), $^{13}\text{C}$ (175 MHz)                                                                                  | S20 |
| <b>Table S4.</b> NMR data for <i>ortho</i> -F-Pheol alamethicin F50 ( <b>2</b> ). Data recorded in $\text{CD}_3\text{OH}$ . $^1\text{H}$ (700 MHz), $^{13}\text{C}$ (175 MHz), and $^{19}\text{F}$ (470 MHz)                             | S22 |
| <b>Table S5.</b> NMR data for <i>meta</i> -F-Pheol alamethicin F50 ( <b>3</b> ). Data recorded in $\text{CD}_3\text{OH}$ . $^1\text{H}$ (700 MHz), $^{13}\text{C}$ (175 MHz), and $^{19}\text{F}$ (470 MHz)                              | S24 |

#### List of schemes

|                                                                                                                                                                                                         |     |
|---------------------------------------------------------------------------------------------------------------------------------------------------------------------------------------------------------|-----|
| <b>Scheme S1.</b> Culture conditions of MSX70741 and MSX57715 on rice (EC, control) and rice supplemented with a racemic mixture of <i>ortho</i> , <i>meta</i> or <i>para</i> -F-phenylalanine (E2-E4). | S13 |
| <b>Scheme S2.</b> Experiments designed for optimization of culture conditions for biosynthesis of fluorinated alamethicin F50 analogues.                                                                | S14 |
| <b>Scheme S3.</b> Synthetic strategy for the preparation of <i>ortho</i> -F-Pheol and <i>meta</i> -F-Pheol standards.                                                                                   | S15 |

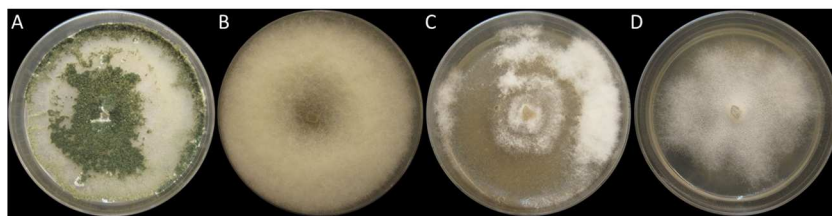

**Figure S1.** Cultures of MSX70741 (*Trichoderma arundinaceum*) grown on Potato Dextrose Agar (PDA) under four different conditions for 21 days. A) Normal PDA. B) PDA supplemented with *ortho*-F-DL-Phe. C) PDA supplemented with *meta*-F-DL-Phe. D) PDA supplemented with *para*-F-DL-Phe.

## Fungal strain isolation and identification

Mycosynthetix fungal strain MSX70741 was isolated from wood collected in a humid mountain forest (April 1993), while strain MSX57715 was isolated from leaf litter in a predominately oak forest (October 1991) both by Dr. Barry Katz.<sup>1</sup> Both strains were used previously for the isolation of peptaibols.<sup>1</sup> At that time, we utilized the D2 region of the 28S rDNA and classified the above two strains only to ordinal level as *Hypocreales* spp. (GenBank accessions: JN377382 and JN377381, respectively). Based on morphological examination of the strains grown on potato dextrose agar (PDA, Difco), we were able to identify the strains as belonging to the genus *Trichoderma*. In this study, we sequenced three gene regions, specifically the partial fragment of translation elongation factor 1-alpha (*tef1*), the partial region of the second largest subunits of RNA polymerase (*RPB2*), and the ITS1, 5.8S, ITS2 rDNA for the identification of fungal strains, as these loci have been used successfully for the identification of *Trichoderma* spp previously<sup>2,3</sup> and reference strains are available in the RefSeq Database maintained by GenBank<sup>4</sup> for identification via DNA barcoding and DNA-taxonomy approaches. The ITS region was obtained with primers ITS5 and ITS4;<sup>5</sup> the *tef1* region, specifically intron 4 in combination with intron 5, which is useful for species-level identification, was obtained using primer combinations 728F/983F and 986R/2218R,<sup>6,7</sup> while *RPB2* was obtained using primers RPB25f and RPB27cr.<sup>8</sup> Thermocycler parameters and primer sequences for the three regions are outlined in Table S1. Sanger sequencing of the purified PCR products was performed using BigDye Terminator v3.1 cycle sequencing at Eurofins Genomics (<https://www.eurofinsgenomics.com>). The sequences were obtained bidirectionally using both strands with the same primers used for PCR. Sequences were generated on an Applied Biosystems 3730XL high-throughput capillary sequencer. Sequences were assembled with Sequencher 5.2.3 (Gene Codes), optimized, and then corrected manually when necessary.

The ITS region was sequenced because it has been designated as a barcoding marker for fungi<sup>9</sup> and a reference strain database, International Subcommittee on *Hypocrea* and *Trichoderma* (ISHT) TrichoKey and TrichoBLAST has been developed, which helps in identification of *Trichoderma* strains.<sup>10</sup> When we

BLAST searched the ITS sequence of MSX70741 against the ISHT database, the strain was identified as *Trichoderma brevicompactum*, while GenBank BLAST against the RefSeq database revealed 99% similarity with numerous reference strains belonging to species within the “*T. brevicompactum* clade”, such as *Trichoderma turrialbense* (GenBank NR\_138448; strain CBS 112445), *Trichoderma arundinaceum* (GenBank NR\_134372; strain: ATCC 90237), *Trichoderma protrudens* (GenBank NR\_134373; strain: CBS 121320), and *Trichoderma rodmanii* (GenBank NR\_134374; strain BPI GJS 91-88)). Recent studies have argued that ITS may not provide sufficient resolution for species-level identification within *Trichoderma* and other genera within the order Hypocreales.<sup>11,12</sup> Therefore, we used portions of *tef1* and *RPB2* to obtain a species-level identification of *Trichoderma* spp.<sup>11</sup>

**Table S1.** PCR protocols and primers used for identification of *Trichoderma* spp.

| Locus                                                    | Primer                                      | Primer Sequence 5'-3'                                                                                                                    | Direction                             | PCR protocol                                                                                                                                                                                    | Reference         |
|----------------------------------------------------------|---------------------------------------------|------------------------------------------------------------------------------------------------------------------------------------------|---------------------------------------|-------------------------------------------------------------------------------------------------------------------------------------------------------------------------------------------------|-------------------|
| Translation elongation factor 1-alpha ( <i>tef1</i> )    | EF1-983F/EF1-728F<br><br>EF1-986R/EF1-2218R | GCY CCY GGH CAY CGT GAY TTY AT<br><br>CAT CGA GAA GTT CGA GAA GG<br><br>TAC TTG AAG GAA CCC TTA CC<br><br>ATG ACA CCR ACR GCR ACR GTY TG | Forward<br><br>Forward<br><br>Reverse | 1. 94 °C – 2 min<br>2. 66 °C – 56 °C<br>touchdown (9 cycles)<br>3. 94 °C – 30 sec<br>4. 56 °C – 1 min<br>5. 72 °C – 1 min<br>6. Repeat 3-5 for 36 cycles<br>7. 72 °C – 10 min<br>8. 4 °C finish | <sup>6,7,13</sup> |
| DNA-directed RNA polymerase II subunit 2 ( <i>RPB2</i> ) | RPB2-5f<br>RPB2-7cR                         | GAY GAY MGW GAT CAY TTY GG<br>CCC ATR GCT TGY TTR CCC AT                                                                                 | Forward<br>Reverse                    | 1. 94 °C – 3 min<br>2. 94 °C – 20 sec<br>3. 55 °C – 30 sec<br>4. 72 °C – 1 min<br>5. Repeat 2-4 for 40 cycles<br>6. 72 °C - 10 min<br>7. 4 °C finish                                            | <sup>13</sup>     |
| Internal Transcribed Spacer (ITS)                        | ITS5<br>ITS4                                | GGA AGT AAA AGT CGT AAC AAG G<br>TCC TCC GCT TAT TGA TAT GC                                                                              | Forward<br>Reverse                    | 1. 95 °C – 5 min<br>2. 94 °C – 30 s<br>3. 52 °C – 30 s<br>4. 72 °C – 1 min<br>5. Repeat 2-4 for 35 cycles<br>6. 72 °C – 8 min<br>7. 4 °C finish                                                 | <sup>14,15</sup>  |

Both the *tef1* and *RPB2* sequences were BLAST searched in GenBank separately, and the top most similar sequences were downloaded and aligned with the sequences of MSX70741 using MUSCLE<sup>16</sup> within the program SeaView v. 4.1. We then employed separate phylogenetic analyses for *tef1* and *RPB2* sequences using Maximum Likelihood with RAxML<sup>16</sup> on the CIPRES server<sup>17</sup> with 1000 bootstrap

replicates to assess branch/clade support for the resulting topology of the phylogenetic tree. Maximum Likelihood analyses using both gene regions (*tef1* and *RPB2*) independently placed strain MSX70741 within the *Trichoderma brevicompactum* clade with strong bootstrap support (100% RAxML bootstrap support for *tef1* and 98% RAxML bootstrap support for *RPB2*, respectively). Within the *T. brevicompactum* clade, MSX70741 showed strong phylogenetic affinities to *Trichoderma arundinaceum* (83% RAxML bootstrap support for *tef1* and 100% RAxML bootstrap support for *RPB2*, respectively) (Figure S1). All names used in the phylogenetic analysis conform to recent nomenclature of *Trichoderma* spp<sup>11</sup>. Therefore, based on the results of BLAST search (DNA Barcoding) and Maximum Likelihood analyses (DNA-taxonomy), MSX70741 was identified as *Trichoderma arundinaceum*<sup>2</sup> (Ascomycota; Pezizomycotina; Sordariomycetes; Hypocreomycetidae; Hypocreales; Hypocreaceae). The sequence data for MSX70741 were deposited in GenBank (accession no: ITS: KY630171, *tef1*: KY630169, KY630170, *RPB2*: KY630166).

For identification of MSX57715, we sequenced *tef1* and *RPB2*, but not the ITS region, as it shows incomplete resolution for species-level identification in *Trichoderma* spp. Based on a BLAST search using GenBank, the closest hits using *tef1* sequences were *Trichoderma albolutescens* (GenBank FJ860609; strain: CBS 119286; Identities = 724/730 (99%), Gaps = 3/730 (0%)), and *Trichoderma albolutescens* (GenBank FJ860609; strain: S396; Identities = 720/726 (99%), Gaps = 3/26 (0%)). Further, based on a Maximum Likelihood analysis using *RPB2* sequences by employing RAxML, MSX57715 was identified as *Trichoderma albolutescens* (MSX57715 occurred on a strongly supported clade; 100% RAxML bootstrap support with reference strain GenBank: FJ860517, strain: Ex-type culture: CBS 119286 of *Trichoderma albolutescens*) (Supporting information). The sequence data for MSX57715 were deposited in GenBank (accession no: *tef1*: KY630167, KY630168, *RPB2*: KY630164, KY630165).



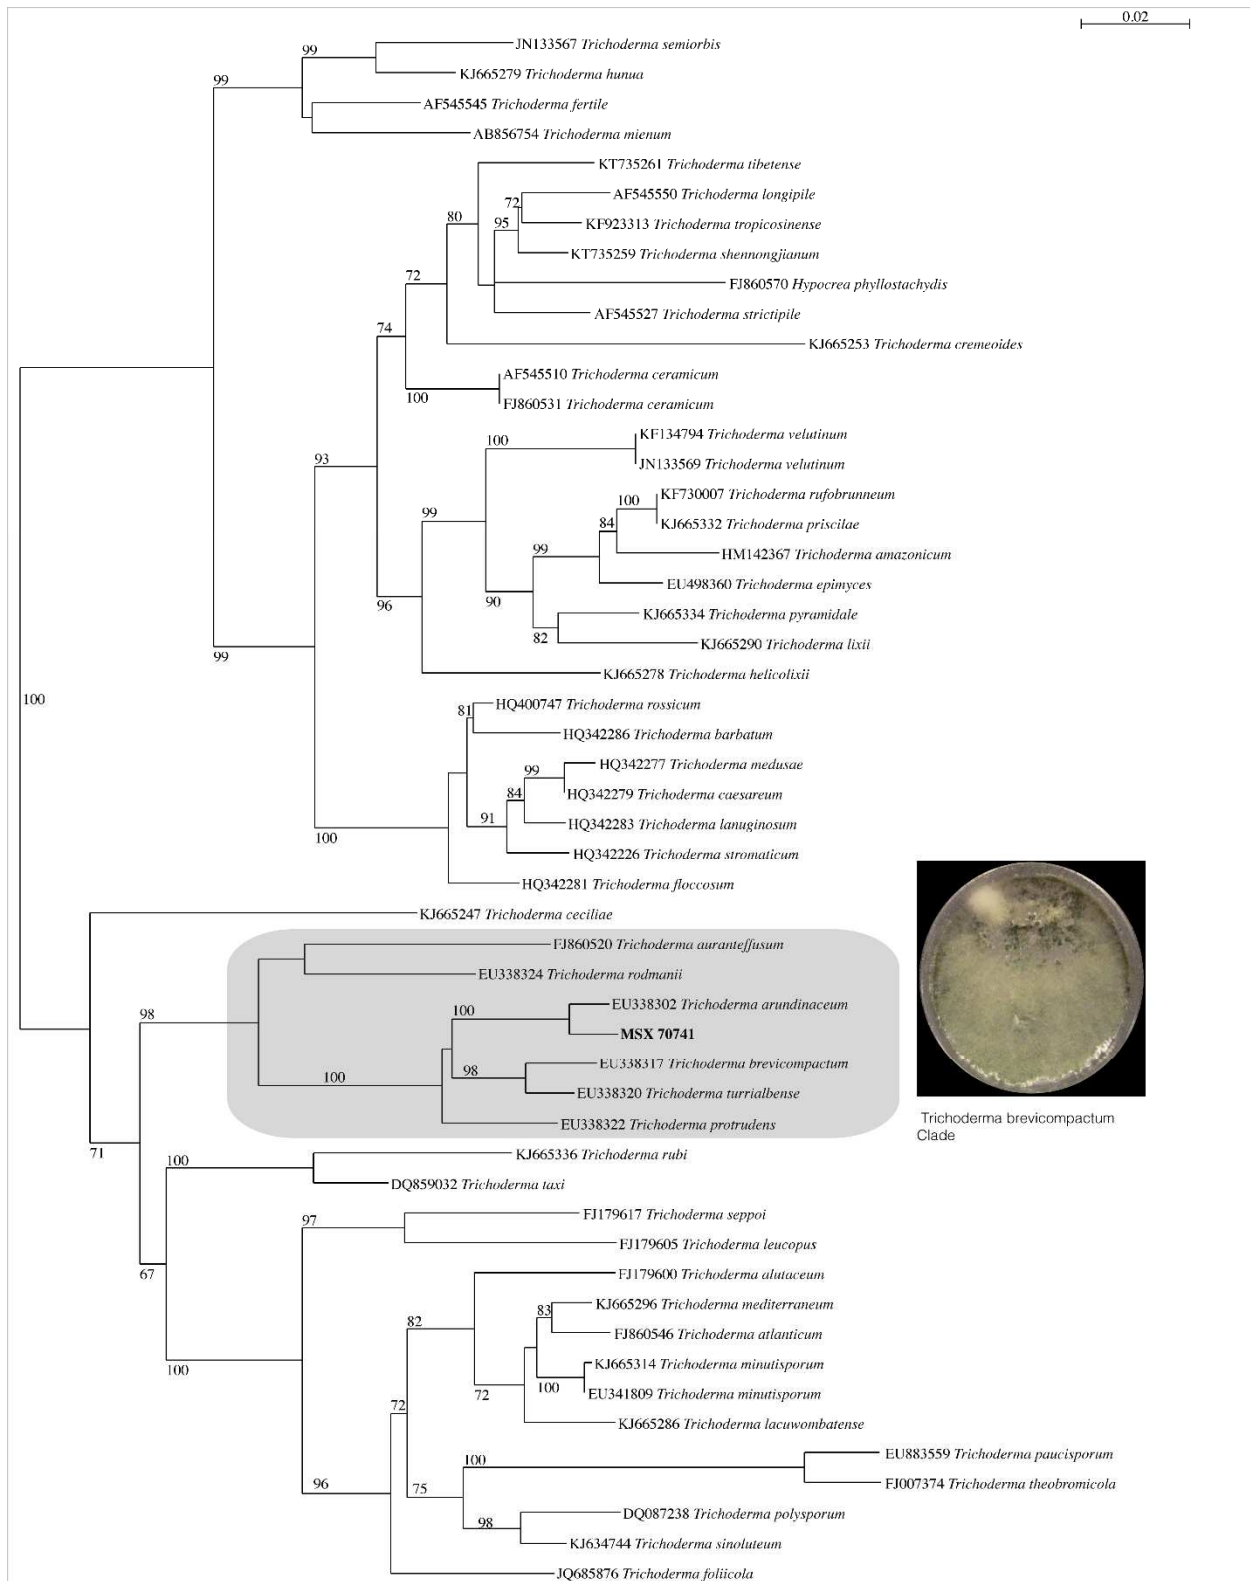

**Figure S2.** Phylogram of the most likely tree ( $-\ln L = 7876.71$ ) from a RAxML analysis of 52 taxa based on *RPB2* sequence data (1063 bp). Numbers refer to RAxML bootstrap support values  $\geq 70\%$  based on 1000 replicates. Strain MSX70741 was identified as *Trichoderma arundinaceum* (Bold, highlighted in gray). A 14 d old culture on Potato Dextrose Agar media is shown. Bar indicates nucleotide substitutions per site.

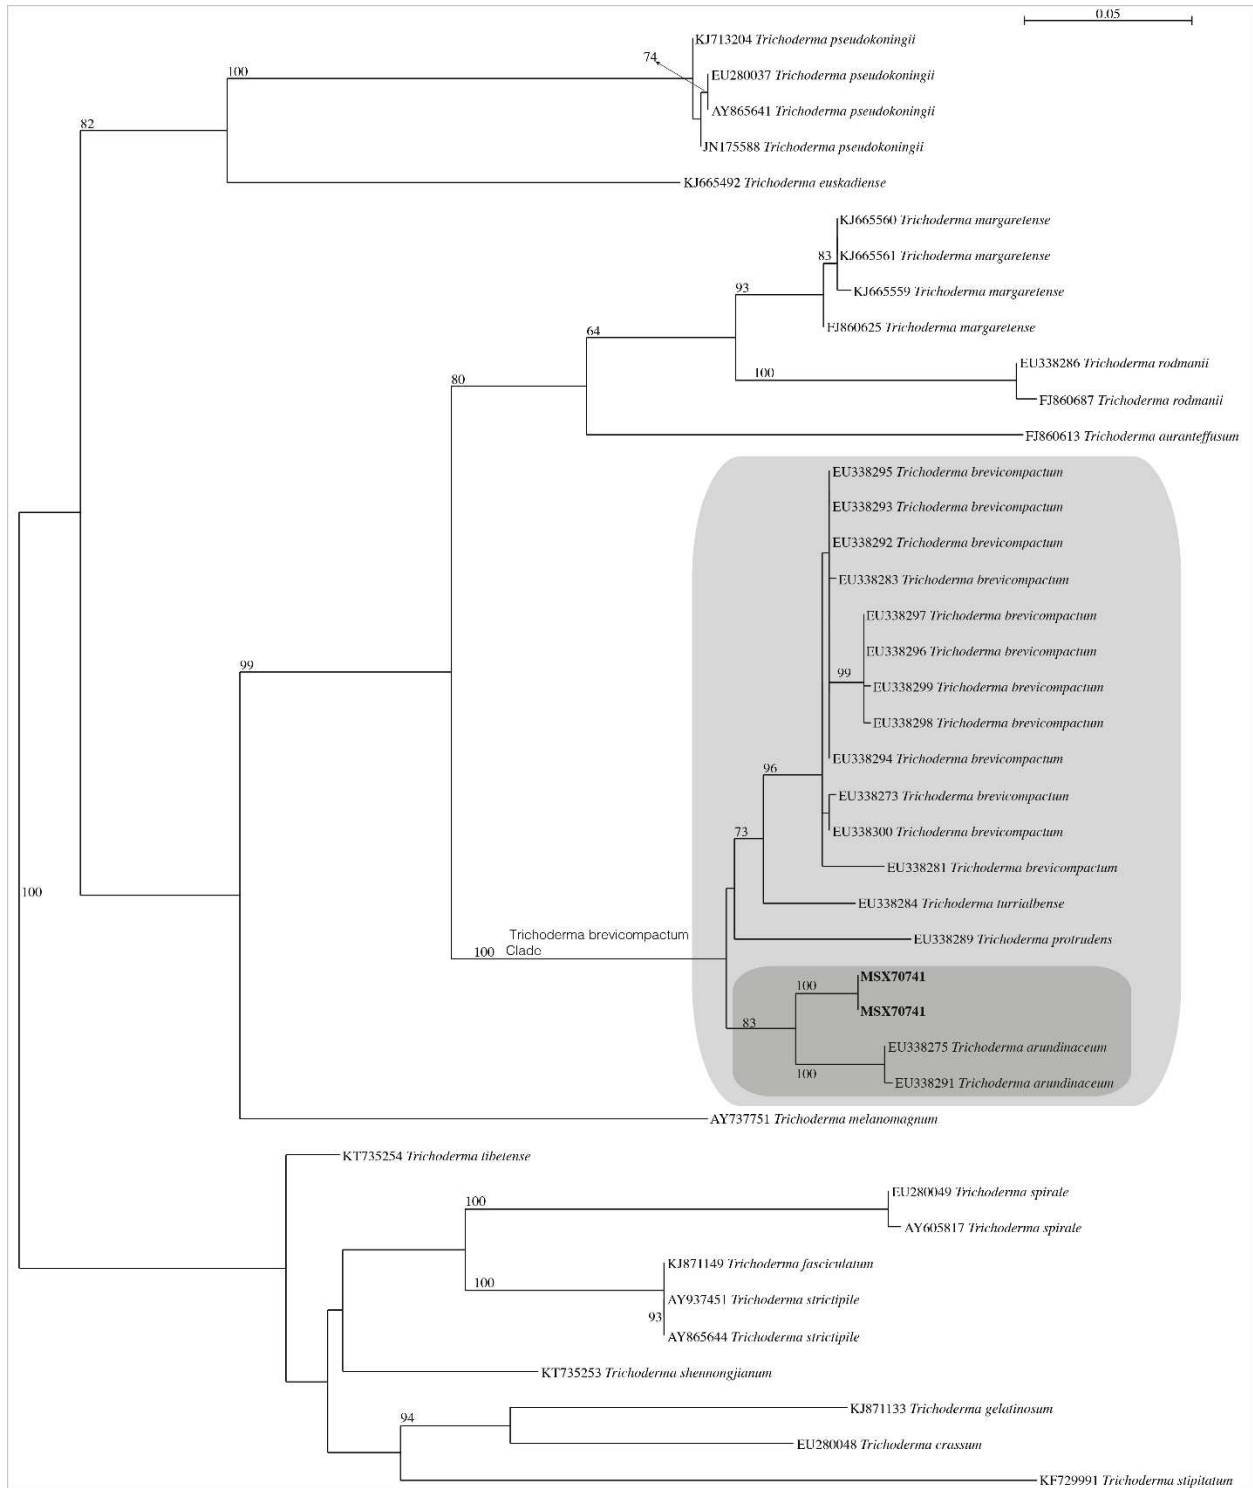

**Figure S3.** Phylogram of the most likely tree (-lnL = 3836.71) from a RAxML analysis of 41 taxa based on *tef-1* sequence data (518 bp). Numbers refer to RAxML bootstrap support values  $\geq 70\%$  based on 1000 replicates. Strain MSX70741 was identified as *Trichoderma arundinaceum* (Bold, highlighted in gray). Bar indicates nucleotide substitutions per site.

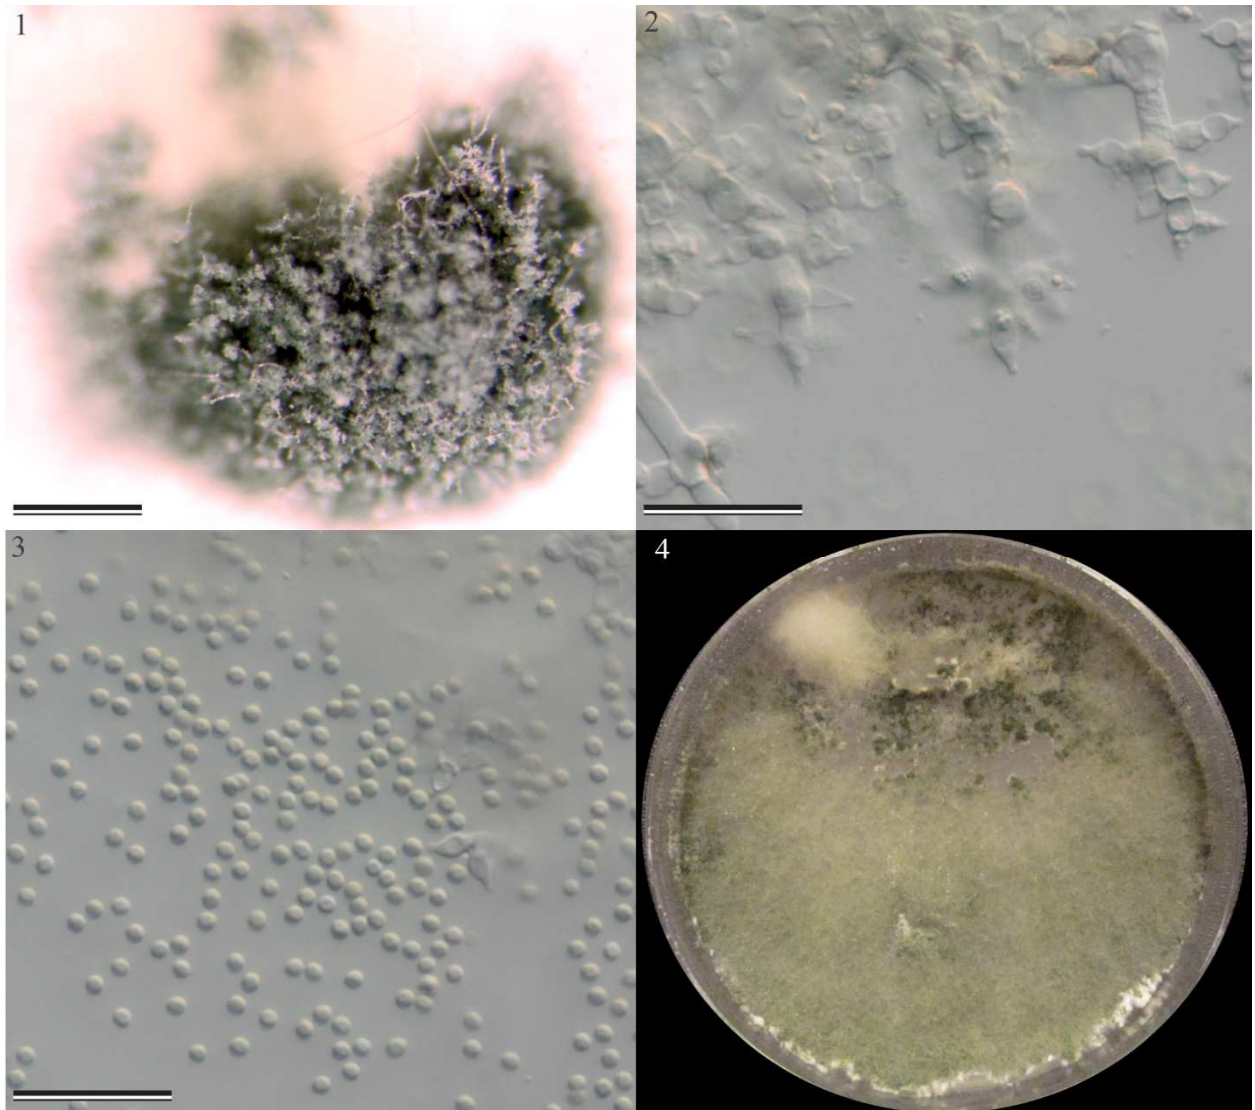

**Figure S4.** *Trichoderma arundinaceum* (MSX70741). 1. Pustules showing protruding conidiophores. 2. Conidiophore on PDA (Difco). 3. Conidia. 4. 14 d old culture on PDA media; Scale Bars: 1 = 100 μm, 2, 3 = 20 μm.

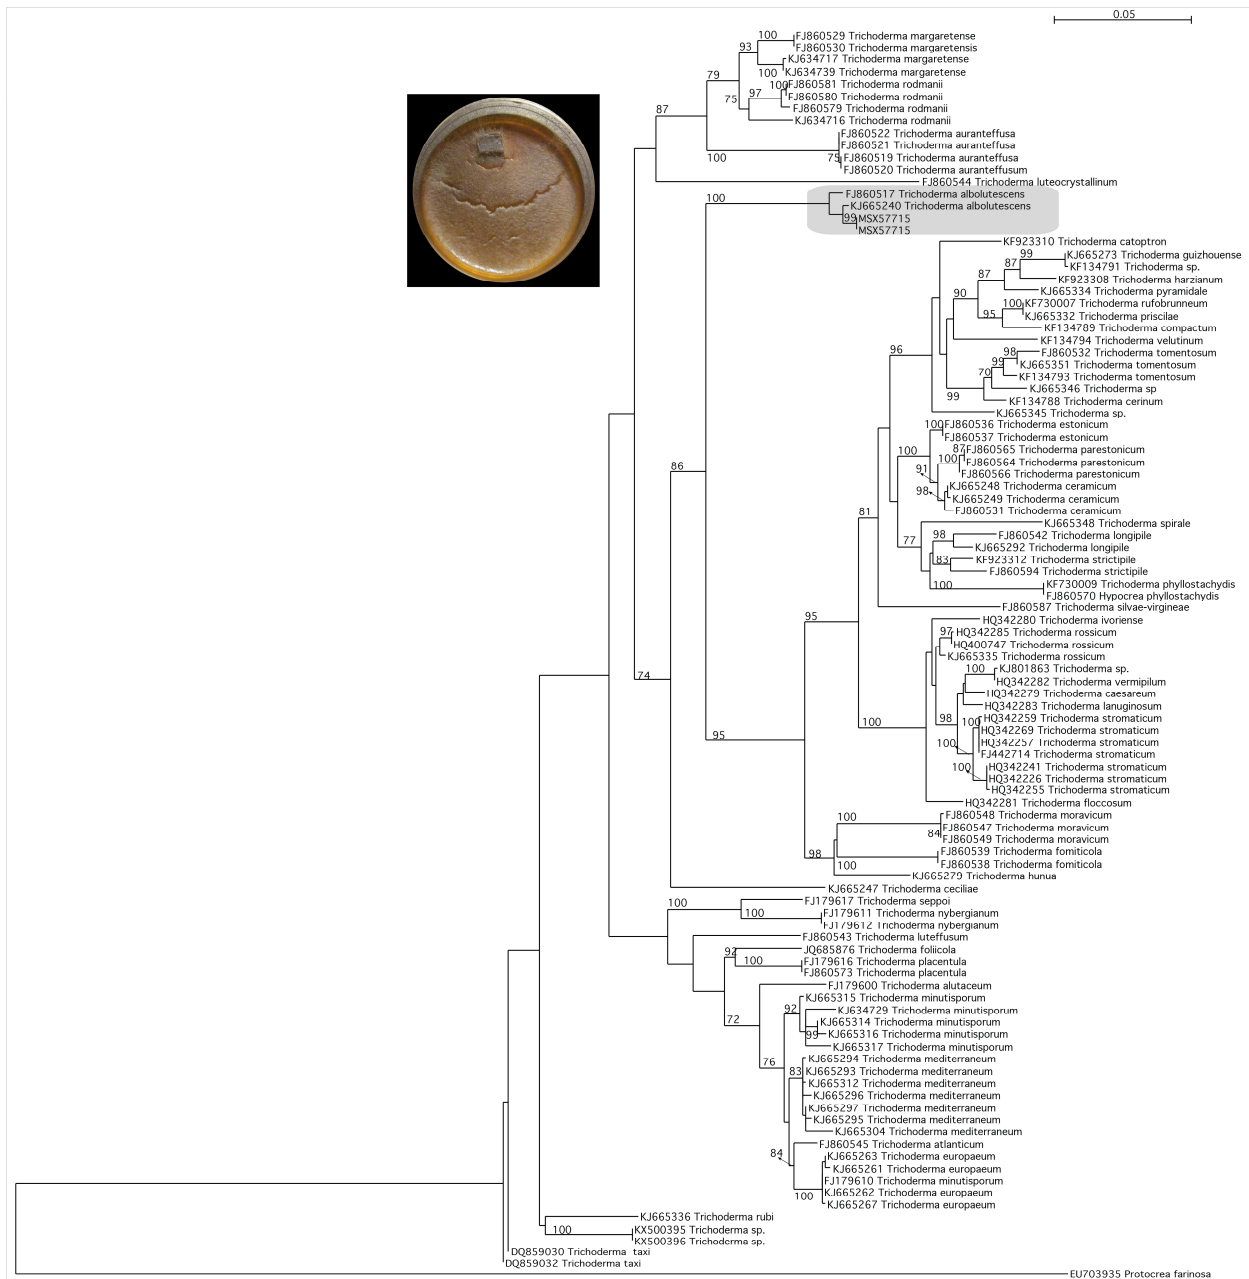

**Figure S5.** Phylogram of the most likely tree ( $-\ln L = 9524.67$ ) from a RAxML analysis of 103 taxa based on *RPB2* sequence data (1060 bp). Numbers refer to RAxML bootstrap support values  $\geq 70\%$  based on 1000 replicates. Strain MSX57715 was identified as *Trichoderma albolutescens* (highlighted in gray). A 14 d old culture on Potato Dextrose Agar media is shown. Bar indicates nucleotide substitutions per site. *Protocrea farinosa* is used as an outgroup.

## Fermentation, extraction and isolation

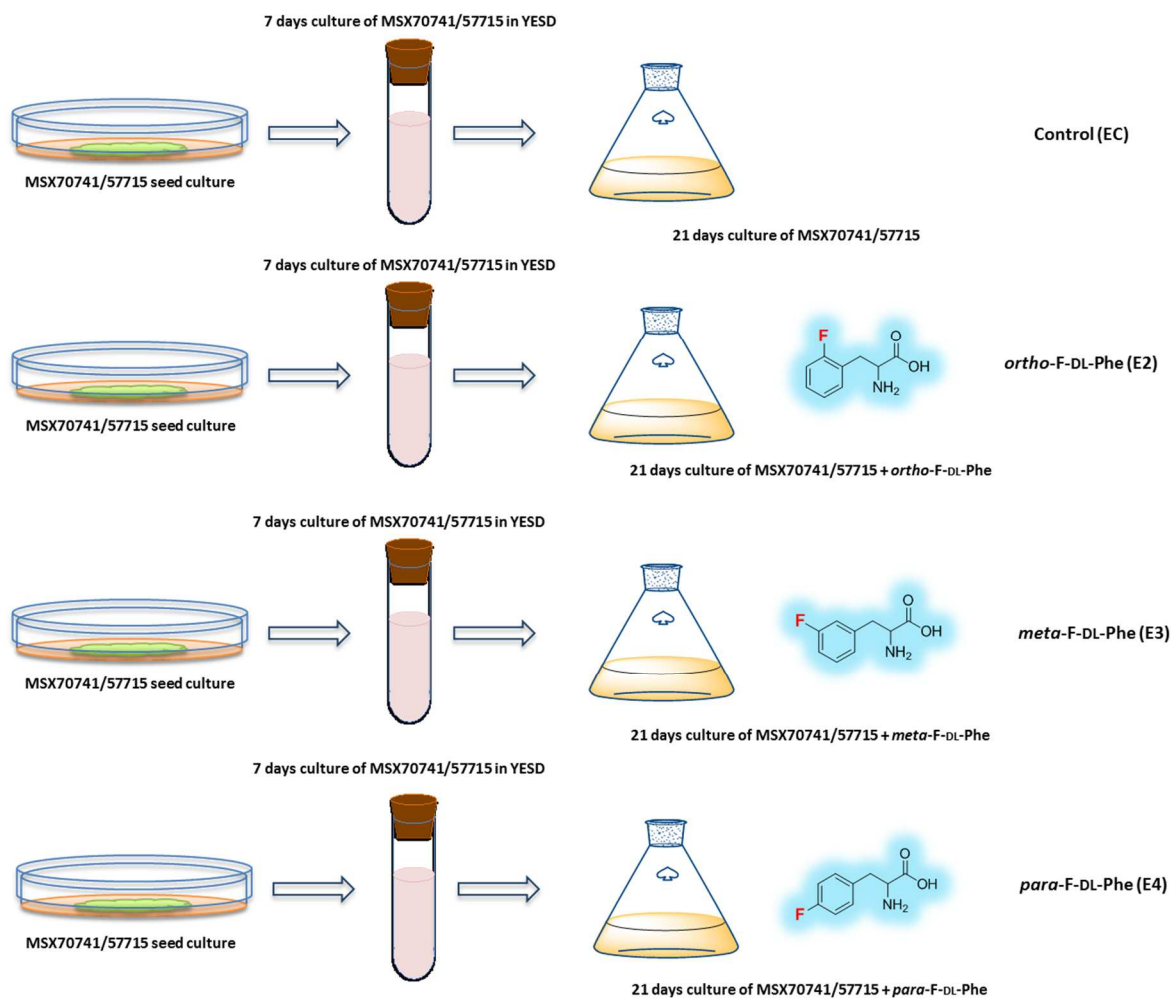

**Scheme S1.** Culture conditions of MSX70741 and MSX57715 on rice (EC, control) and rice supplemented with a racemic mixture of *ortho*, *meta* or *para*-F-phenylalanine (E2-E4).

## Culture conditions optimization

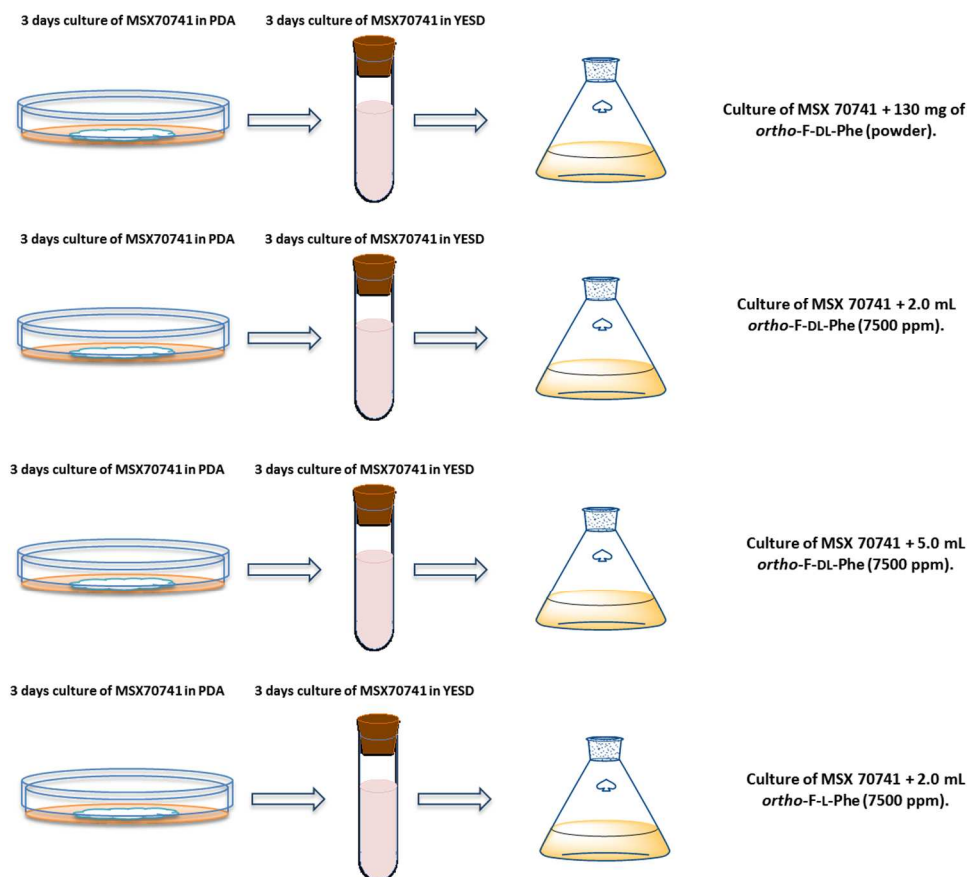

**Scheme S2.** Experiments designed for optimization of culture conditions for biosynthesis of fluorinated alamethicin F50 analogues.

## Preparation of *ortho*-F-Pheol and *meta*-F-Pheol standards

To a suspension of 25 mg of *ortho*-F-D-Phe, *ortho*-F-L-Phe, *meta*-F-D-Phe or *meta*-F-L-Phe (Acros Organics) in 2.5 mL of anhydrous tetrahydrofuran (THF) were added 2.5 mL of a suspension of 15.0 mg of lithium borohydride in 2.5 mL of anhydrous THF. After the addition, the reaction was heated at 65 °C for two hours (Scheme 3) and then cooled to room temperature. Then, the excess of reagent was decomposed by dropwise addition of 2 N aqueous sodium hydroxide and water (5 mL of each). The resulting white solids were collected by filtration and washed with 30 mL of THF (2 ×). The eluent was evaporated *in vacuo*, and the resulting materials were recrystallized from ethyl acetate-hexane 1:1 to give **7-10**.

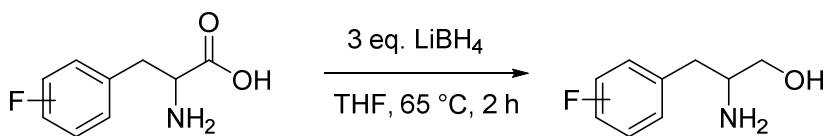

**Scheme S3.** Synthetic strategy for the preparation of *ortho*-F-Pheol and *meta*-F-Pheol standards.

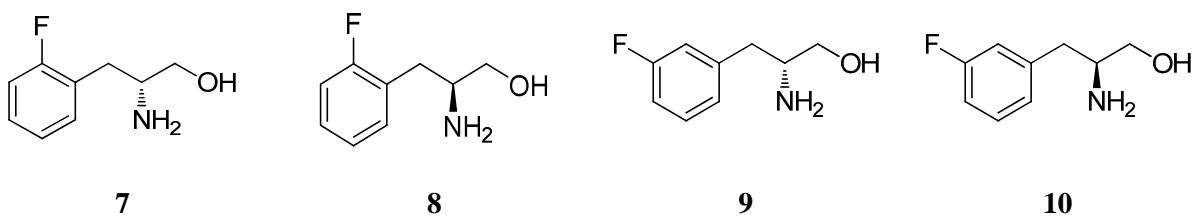

**Figure S6.** Structures of *ortho*-F-D-pheol (**7**), *ortho*-F-L-pheol (**8**), *meta*-F-D-pheol (**9**), and *meta*-F-L-pheol (**10**).

**Table S2.** NMR data for *ortho/meta*-F-Phenylalaninol (**8** and **9**). Data recorded in CD<sub>3</sub>OH. <sup>1</sup>H (500 MHz), <sup>13</sup>C (125 MHz) and <sup>19</sup>F (470 MHz)

| Position | Compound ( <b>8</b> )    |                 |                                                                      | Compound ( <b>9</b> )     |                 |                                                                      |
|----------|--------------------------|-----------------|----------------------------------------------------------------------|---------------------------|-----------------|----------------------------------------------------------------------|
|          | $\delta_c$               | type            | $\delta_H$ , m, J (Hz)                                               | $\delta_c$                | type            | $\delta_H$ , m, J (Hz)                                               |
| 1        | 64.7, <i>s</i>           | CH <sub>2</sub> | a. 3.42, <i>dd</i> , (11.0, 7.0)<br>b. 3.71, <i>dd</i> , (11.0, 4.0) | 61.2, <i>s</i>            | CH <sub>2</sub> | a. 3.55, <i>dd</i> , (11.5, 6.0)<br>b. 3.71, <i>dd</i> , (11.5, 3.5) |
| 2        | 54.5, <i>s</i>           | CH              | 3.22, <i>m</i>                                                       | 55.6, <i>s</i>            | CH              | 3.49, <i>m</i>                                                       |
| 3        | 32.5, <i>d</i> , (1.4)   | CH <sub>2</sub> | a. 2.78, <i>dd</i> , (13.5, 7.0)<br>b. 2.89, <i>dd</i> , (13.5, 7.0) | 35.9, <i>d</i> , (1.6)    | CH <sub>2</sub> | a. 2.99, <i>dd</i> , (14.0, 8.5)<br>b. 3.71, <i>dd</i> , (11.5, 6.5) |
| 4        | 125.8, <i>d</i> , (15.8) | C               |                                                                      | 140.1, <i>d</i> , (7.4)   | C               |                                                                      |
| 5        | 162.7, <i>d</i> (242.3)  | CF              |                                                                      | 117.2, <i>d</i> , (21.5)  | CH              | 7.11, <i>dt</i> , (10.0, 2.0)                                        |
| 6        | 116.4, <i>d</i> , (22.1) | CH              | 7.09, <i>t</i> , (9.0)                                               | 164.4, <i>d</i> , (244.4) | CF              |                                                                      |
| 7        | 130.0, <i>d</i> , (8.1)  | CH              | 7.28, <i>m</i>                                                       | 115.0, <i>d</i> , (21.0)  | CH              | 7.01, <i>td</i> , (8.5, 2.0)                                         |
| 8        | 125.5, <i>d</i> , (3.5)  | CH              | 7.14, <i>t</i> , (7.5)                                               | 131.7, <i>d</i> , (8.4)   | CH              | 7.37, <i>td</i> , (8.0, 6.5)                                         |
| 9        | 132.9, <i>d</i> , (4.6)  | CH              | 7.28, <i>t</i> , (7.5)                                               | 126.4, <i>d</i> , (2.9)   | CH              | 7.15, <i>d</i> , (8.5)                                               |
| 5-F      |                          |                 | -119.65, <i>m</i>                                                    |                           |                 | -                                                                    |
| 6-F      |                          |                 | -                                                                    |                           |                 | -114.78, <i>td</i> , (10.0, 6.5)                                     |



## Marfey's analysis

### Marfey's analysis of standards

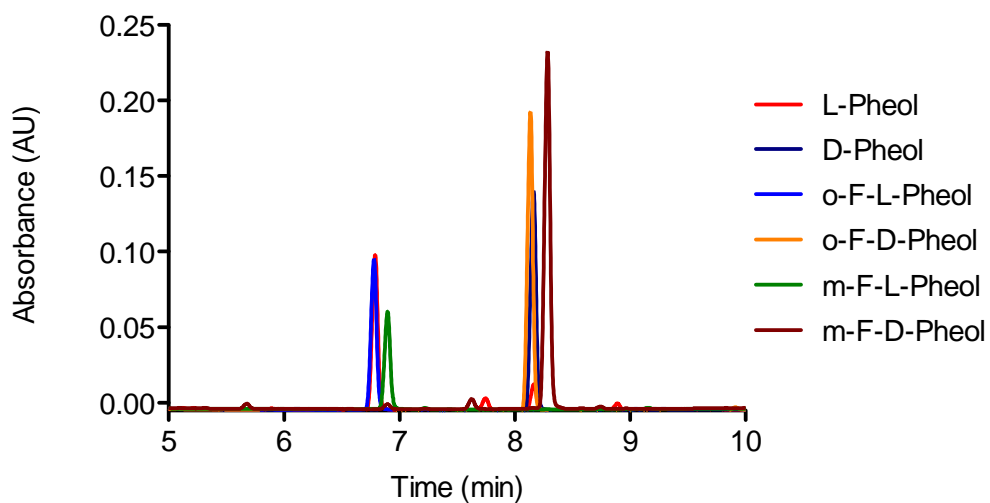

**Figure S7.** Marfey's analysis of standards.

### Marfey's analysis of AF50 (1)

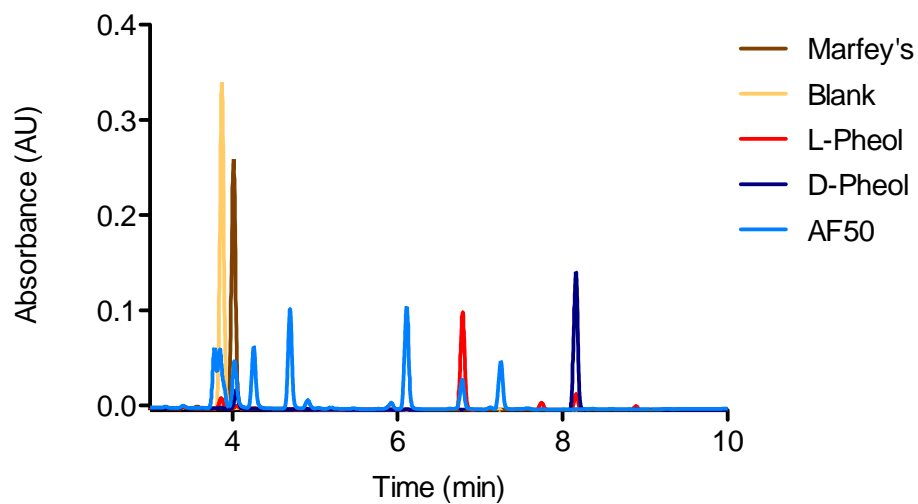

**Figure S8.** Marfey's analysis of alamethicin F50 (1).

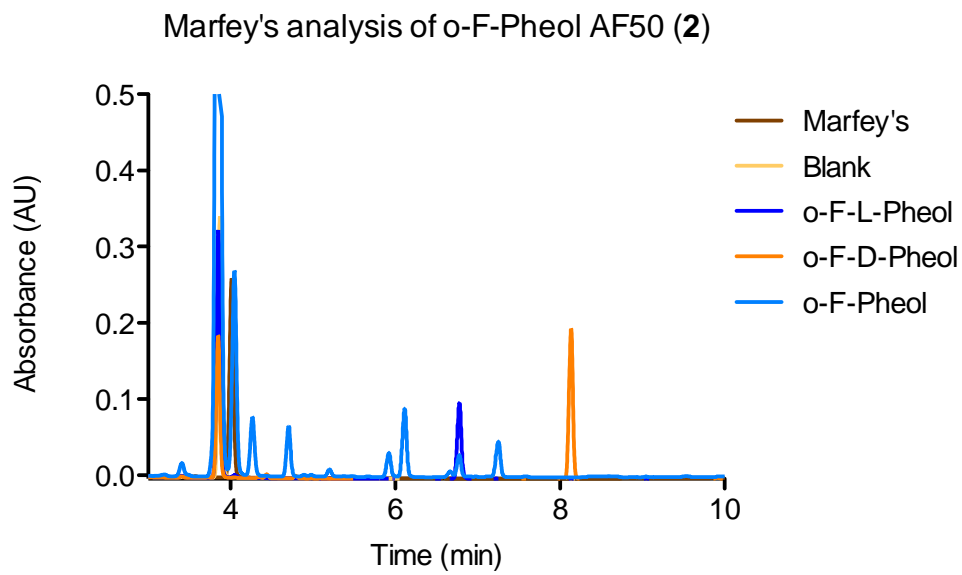

**Figure S9.** Marfey's analysis of *ortho*-F-Pheol alamethicin F50 (2).

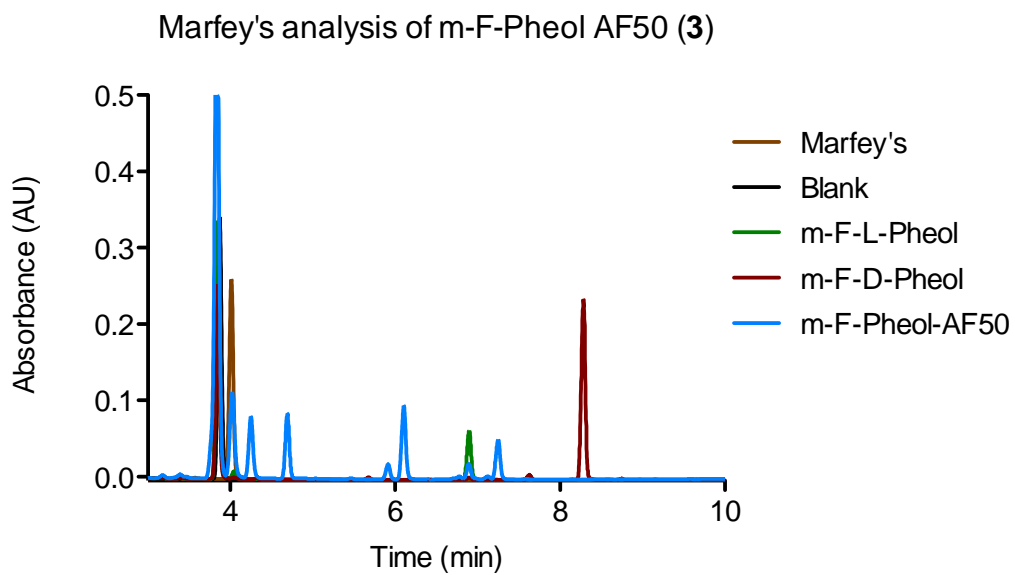

**Figure S10.** Marfey's analysis of *meta*-F-Pheol alamethicin F50 (3).

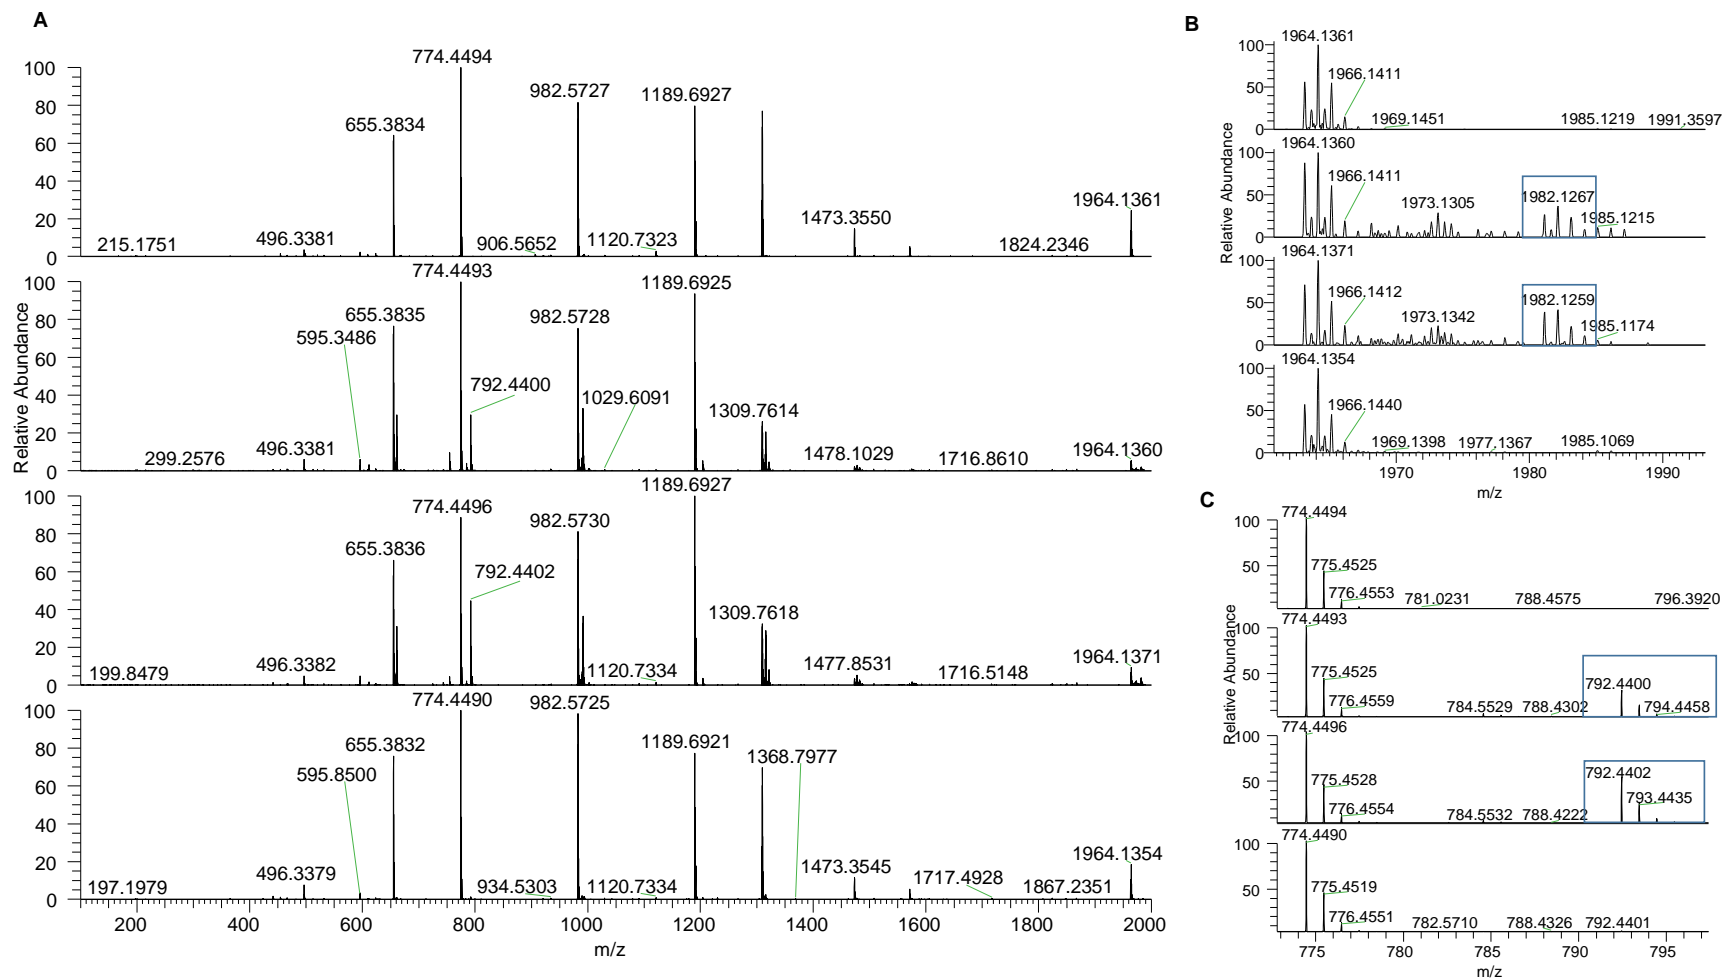

**Figure S11.** A) Full scan positive HRESIMS for extracts of MSX70741 cultured in rice and rice supplemented with *ortho*, *meta*, and *para*-F-DL-Phe (from the top to the bottom), indicating the incorporation of *ortho* and *meta*-F-Phe into the alamethicin F50 molecule. B) Expansion of region at  $m/z$  1960-1990. C) Expansion of region at  $m/z$  770-800. Diagnostic signals for the incorporation of fluorine have been boxed.

**Table S3.** NMR data for alamethicin F50 (**1**). Data recorded in CD<sub>3</sub>OH. <sup>1</sup>H (700 MHz) and <sup>13</sup>C (175 MHz)

| Compound 1 (Alamethicin F50) |                   |                   |                                     |                                                                  |                                              |
|------------------------------|-------------------|-------------------|-------------------------------------|------------------------------------------------------------------|----------------------------------------------|
| Position                     |                   | $\delta_c$        | $\delta_H, m, J$ (Hz)               | HMBC                                                             | NOESY                                        |
| Ac                           | 1                 | 172.5             |                                     |                                                                  |                                              |
|                              | 2                 | 22.5              | 2.05, <i>s</i>                      | Ac-1                                                             |                                              |
| Aib <sup>1</sup>             | 1                 | 175.5             |                                     |                                                                  |                                              |
|                              | 2                 | 57.4              |                                     |                                                                  |                                              |
|                              | 3                 | 23.8              | 1.46, <i>s</i>                      | Aib <sup>1</sup> -1, Aib <sup>1</sup> -2, Aib <sup>1</sup> -4    |                                              |
|                              | 4                 | 26.6              | 1.53, <i>s</i>                      | Aib <sup>1</sup> -1, Aib <sup>1</sup> -2                         |                                              |
| Pro <sup>2</sup>             | NH                |                   | 8.63, <i>s</i>                      | Ac-1, Aib <sup>1</sup> -1, Aib <sup>1</sup> -2                   | Pro <sup>2</sup> -5a, Pro <sup>2</sup> -5b   |
|                              | 1                 | 175.6             |                                     |                                                                  |                                              |
|                              | 2                 | 65.7              | 4.25, <i>t</i> , (8.4)              | Pro <sup>2</sup> -1, Pro <sup>2</sup> -3                         |                                              |
|                              | 3                 | 29.7 <sup>a</sup> | 1.80, <i>m</i>                      | Pro <sup>2</sup> -2, Pro <sup>2</sup> -4                         |                                              |
|                              | 4                 | 27.1              | 2.34, <i>m</i>                      | Pro <sup>2</sup> -2, Pro <sup>2</sup> -4                         |                                              |
| Aib <sup>3</sup>             | 5                 | 50.0              | 1.96, <i>m</i>                      | Pro <sup>2</sup> -3, Pro <sup>2</sup> -5                         |                                              |
|                              |                   |                   | 2.08, <i>m</i>                      | Pro <sup>2</sup> -3, Pro <sup>2</sup> -5                         |                                              |
|                              |                   |                   | 3.49, <i>td</i> , (9.8, 5.6)        | Pro <sup>2</sup> -4                                              | Aib <sup>1</sup> -NH                         |
|                              |                   |                   | 3.95, <i>m</i>                      | Pro <sup>2</sup> -4, Aib <sup>1</sup> -1                         | Aib <sup>1</sup> -NH                         |
|                              | 1                 | 178.5             |                                     |                                                                  |                                              |
| Ala <sup>4</sup>             | 2                 | 57.4              |                                     |                                                                  |                                              |
|                              | 3                 | 23.1              | 1.54, <i>s</i>                      | Aib <sup>3</sup> -1, Aib <sup>3</sup> -2                         |                                              |
|                              | 4                 | 27.4              | 1.56, <i>s</i>                      | Aib <sup>3</sup> -2                                              |                                              |
|                              | NH                | NH                | 7.62, <i>s</i>                      | Aib <sup>3</sup> -1, Pro <sup>2</sup> -1                         | Pro <sup>2</sup> -5a                         |
| Aib <sup>5</sup>             | 1                 | 177.2             |                                     |                                                                  |                                              |
|                              | 2                 | 54.1              | 4.09, <i>qd</i> , (7.7, 5.6)        | Ala <sup>4</sup> -1, Ala <sup>4</sup> -3                         | Ala <sup>4</sup> -NH                         |
|                              | 3                 | 17.1              | 1.49, <i>d</i> , (7.7)              | Ala <sup>4</sup> -1                                              |                                              |
|                              | NH                |                   | 7.55, <i>d</i> , (5.6)              | Ala <sup>4</sup> -1, Aib <sup>3</sup> -1                         | Ala <sup>4</sup> -2                          |
| Ala <sup>6</sup>             | 1                 | 177.8             |                                     |                                                                  |                                              |
|                              | 2                 | 57.3              |                                     |                                                                  |                                              |
|                              | 3                 | 23.1              | 1.54, <i>s</i>                      | Aib <sup>5</sup> -1                                              |                                              |
|                              | 4                 | 27.1              | 1.56, <i>s</i>                      | Aib <sup>5</sup> -1, Aib <sup>5</sup> -2                         |                                              |
| Aib <sup>6</sup>             | NH                |                   | 7.94, <i>s</i>                      | Aib <sup>5</sup> -1, Ala <sup>4</sup> -1                         | Ala <sup>4</sup> -NH (weak)                  |
|                              | 1                 | 178.2             |                                     |                                                                  |                                              |
|                              | 2                 | 54.1              | 4.02, <i>m</i>                      | Ala <sup>6</sup> -1, Ala <sup>6</sup> -3                         |                                              |
| Gln <sup>7</sup>             | 3                 | 17.0              | 1.53, <i>d</i> , overlapped         | Ala <sup>6</sup> -2                                              |                                              |
|                              | NH                |                   | 7.92, <i>brs</i>                    | Ala <sup>6</sup> -2, Aib <sup>5</sup> -1                         | Ala <sup>6</sup> -2                          |
|                              | 1                 | 175.8             |                                     |                                                                  |                                              |
|                              | 2                 | 58.1              | 3.92, <i>m</i>                      | Gln <sup>7</sup> -1, Ala <sup>6</sup> -1                         |                                              |
| Aib <sup>8</sup>             | 3                 | 27.1              | 2.14, <i>m</i>                      | Gln <sup>7</sup> -2, Gln <sup>7</sup> -4                         |                                              |
|                              | 4                 | 32.6              | 2.27, <i>m</i>                      | Gln <sup>7</sup> -2, Gln <sup>7</sup> -4                         |                                              |
|                              | 5                 | 177.3             | 2.34, <i>m</i>                      | Gln <sup>7</sup> -2, Gln <sup>7</sup> -3, Gln <sup>7</sup> -5    |                                              |
|                              | NH                |                   | 2.54, <i>ddd</i> , (15.4, 9.8, 5.4) | Gln <sup>7</sup> -2, Gln <sup>7</sup> -3, Gln <sup>7</sup> -5    |                                              |
|                              | 5-NH <sub>2</sub> |                   | 7.99, <i>d</i> , (4.9)              | Gln <sup>7</sup> -2, Ala <sup>6</sup> -1                         | Ala <sup>6</sup> -NH                         |
|                              |                   |                   | 6.77, <i>brs</i>                    | Gln <sup>7</sup> -3, Gln <sup>7</sup> -5                         |                                              |
| Val <sup>9</sup>             |                   |                   | 7.44, <i>brs</i>                    | Gln <sup>7</sup> -5                                              |                                              |
|                              | 1                 | 178.2             |                                     |                                                                  |                                              |
|                              | 2                 | 57.6              |                                     |                                                                  |                                              |
|                              | 3                 | 23.3              | 1.52, <i>s</i>                      | Aib <sup>8</sup> -1, Aib <sup>8</sup> -2                         |                                              |
| Aib <sup>10</sup>            | 4                 | 27.4              | 1.55, <i>s</i>                      | Aib <sup>8</sup> -1, Aib <sup>8</sup> -2                         |                                              |
|                              | NH                |                   | 8.09, <i>s</i>                      | Aib <sup>8</sup> -1, Gln <sup>7</sup> -1                         | Gln <sup>7</sup> -2                          |
|                              | 1                 | 175.3             |                                     |                                                                  |                                              |
|                              | 2                 | 65.7              | 3.58, <i>m</i>                      | Val <sup>9</sup> -1, Val <sup>9</sup> -3                         | Aib <sup>10</sup> -NH                        |
|                              | 3                 | 30.4              | 2.25, <i>m</i>                      | Val <sup>9</sup> -2,                                             |                                              |
| Gly <sup>11</sup>            | 4                 | 19.6              | 1.00, <i>d</i> , (7.0)              | Val <sup>9</sup> -2, Val <sup>9</sup> -3                         |                                              |
|                              | 5                 | 20.9              | 1.14, <i>d</i> , (7.0)              | Val <sup>9</sup> -2, Val <sup>9</sup> -3                         |                                              |
|                              | NH                |                   | 7.49, <i>d</i> , (4.9)              | Val <sup>9</sup> -2, Aib <sup>8</sup> -1                         |                                              |
|                              | 1                 | 179.0             |                                     |                                                                  |                                              |
|                              | 2                 | 57.6              |                                     |                                                                  |                                              |
| Leu <sup>12</sup>            | 3                 | 26.8              | 1.54, <i>s</i>                      | Aib <sup>10</sup> -1, Val <sup>9</sup> -1                        |                                              |
|                              | 4                 | 27.1              | 1.56, <i>s</i>                      | Aib <sup>10</sup> -1, Aib <sup>10</sup> -2,                      |                                              |
|                              | NH                |                   | 8.23, <i>s</i>                      | Aib <sup>10</sup> -1, Val <sup>9</sup> -1                        | Val <sup>9</sup> -2, Gly <sup>11</sup> -2b   |
|                              | 1                 | 173.0             |                                     |                                                                  |                                              |
| Aib <sup>13</sup>            | 2                 | 45.1              | 3.66, <i>m</i>                      | Gly <sup>11</sup> -1                                             |                                              |
|                              |                   |                   | 3.93, <i>m</i>                      | Gly <sup>11</sup> -1                                             |                                              |
|                              | NH                |                   | 8.34, <i>brt</i> , (6.3)            | Gly <sup>11</sup> -2, Aib <sup>10</sup> -1                       | Gly <sup>11</sup> -2a, Gly <sup>11</sup> -2b |
|                              | 1                 | 175.8             |                                     |                                                                  |                                              |
|                              | 2                 | 54.1              | 4.47, <i>ddd</i> , (10.5, 7.0, 3.5) | Leu <sup>12</sup> -1, Leu <sup>12</sup> -3, Leu <sup>12</sup> -4 |                                              |
| Gly <sup>11</sup>            | 3                 | 41.5              | 1.59, overlapped                    | Leu <sup>12</sup> -4,                                            |                                              |
|                              | 4                 | 25.7              | 1.96, <i>m</i>                      | Leu <sup>12</sup> -2, Leu <sup>12</sup> -4                       |                                              |
|                              | 5                 | 21.3              | 1.91, <i>m</i>                      | Leu <sup>12</sup> -3                                             |                                              |
|                              | 6                 | 23.4              | 0.92, <i>d</i> , (6.3)              | Leu <sup>12</sup> -3, Leu <sup>12</sup> -4                       |                                              |
|                              | NH                |                   | 0.94, <i>d</i> , (6.3)              | Leu <sup>12</sup> -3, Leu <sup>12</sup> -4                       |                                              |
|                              |                   |                   | 8.11, <i>d</i> , (7.7)              | Leu <sup>12</sup> -2, Gly <sup>11</sup> -1                       | Gly <sup>11</sup> -2a, Gly <sup>11</sup> -2b |
| Leu <sup>12</sup>            | 1                 | 174.9             |                                     |                                                                  |                                              |
|                              | 2                 | 58.1              |                                     |                                                                  |                                              |
|                              | 3                 | 23.7              | 1.61, <i>s</i>                      | Aib <sup>13</sup> -1, Aib <sup>13</sup> -2, Aib <sup>13</sup> -4 |                                              |
|                              | 4                 | 26.7              | 1.54, <i>s</i>                      | Aib <sup>13</sup> -1, Aib <sup>13</sup> -2                       |                                              |

|                     |    |                        |                                                                                                              |                                                                                                                                                                                                |                                              |
|---------------------|----|------------------------|--------------------------------------------------------------------------------------------------------------|------------------------------------------------------------------------------------------------------------------------------------------------------------------------------------------------|----------------------------------------------|
|                     | NH |                        | 8.41, <i>s</i>                                                                                               | Aib <sup>13</sup> -1, Leu <sup>12</sup> -1                                                                                                                                                     | Pro <sup>14</sup> -5a, Pro <sup>14</sup> -5b |
| Pro <sup>14</sup>   | 1  | 176.4                  |                                                                                                              |                                                                                                                                                                                                |                                              |
|                     | 2  | 64.7                   | 4.39, <i>dd</i> , (9.1, 6.3)                                                                                 | Pro <sup>14</sup> -1, Pro <sup>14</sup> -3, Pro <sup>14</sup> -4                                                                                                                               |                                              |
|                     | 3  | 30.0                   | 1.80, <i>m</i><br>2.32, <i>m</i>                                                                             | Pro <sup>14</sup> -2, Pro <sup>14</sup> -4, Pro <sup>14</sup> -5<br>Pro <sup>14</sup> -2, Pro <sup>14</sup> -4, Pro <sup>14</sup> -5                                                           |                                              |
|                     | 4  | 26.9                   | 1.99, <i>m</i><br>2.08, <i>m</i>                                                                             | Pro <sup>14</sup> -2, Pro <sup>14</sup> -3, Pro <sup>14</sup> -5<br>Pro <sup>14</sup> -2, Pro <sup>14</sup> -3, Pro <sup>14</sup> -5                                                           |                                              |
|                     | 5  | 50.6                   | 3.75, <i>m</i><br>3.87, <i>dt</i> , (11.2, 5.6)                                                              | Pro <sup>14</sup> -3, Pro <sup>14</sup> -4<br>Pro <sup>14</sup> -3, Pro <sup>14</sup> -4, Aib <sup>13</sup> -1                                                                                 | Aib <sup>13</sup> -NH                        |
| Val <sup>15</sup>   | 1  | 175.3                  |                                                                                                              |                                                                                                                                                                                                |                                              |
|                     | 2  | 64.3                   | 3.74, <i>m</i>                                                                                               | Val <sup>15</sup> -1, Val <sup>15</sup> -3                                                                                                                                                     |                                              |
|                     | 3  | 30.5                   | 2.34, <i>m</i>                                                                                               | Val <sup>15</sup> -2                                                                                                                                                                           |                                              |
|                     | 4  | 19.5                   | 0.98, <i>d</i> , (7.0)                                                                                       | Val <sup>15</sup> -2, Val <sup>15</sup> -3                                                                                                                                                     |                                              |
|                     | 5  | 20.2                   | 1.07, <i>d</i> , (7.0)<br>7.64, <i>d</i> , (8.4)                                                             | Val <sup>15</sup> -2, Val <sup>15</sup> -3<br>Val <sup>15</sup> -2, Pro <sup>14</sup> -1                                                                                                       | Pro <sup>14</sup> -5a                        |
| Aib <sup>16</sup>   | 1  | 177.6                  |                                                                                                              |                                                                                                                                                                                                |                                              |
|                     | 2  | 57.6                   |                                                                                                              |                                                                                                                                                                                                |                                              |
|                     | 3  | 23.4                   | 1.54, <i>s</i>                                                                                               | Aib <sup>16</sup> -1, Aib <sup>16</sup> -2, Aib <sup>16</sup> -4                                                                                                                               |                                              |
|                     | 4  | 27.4                   | 1.54, <i>s</i>                                                                                               | Aib <sup>16</sup> -1, Aib <sup>16</sup> -2                                                                                                                                                     |                                              |
| NH                  |    | 7.60, <i>s</i>         | Aib <sup>16</sup> -1, Aib <sup>16</sup> -2, Aib <sup>16</sup> -4, Val <sup>15</sup> -1                       | Val <sup>15</sup> -2                                                                                                                                                                           |                                              |
| Aib <sup>17</sup>   | 1  | 178.7                  |                                                                                                              |                                                                                                                                                                                                |                                              |
|                     | 2  | 57.7                   |                                                                                                              |                                                                                                                                                                                                |                                              |
|                     | 3  | 23.4                   | 1.53, <i>s</i>                                                                                               | Aib <sup>17</sup> -1, Aib <sup>17</sup> -2                                                                                                                                                     |                                              |
|                     | 4  | 27.4                   | 1.55, <i>s</i>                                                                                               | Aib <sup>17</sup> -1, Aib <sup>17</sup> -2                                                                                                                                                     |                                              |
| NH                  |    | 7.82, <i>s</i>         | Aib <sup>17</sup> -1, Aib <sup>17</sup> -2, Aib <sup>17</sup> -3, Aib <sup>17</sup> -4, Aib <sup>16</sup> -1 | Gln <sup>18</sup> -3, Gln <sup>18</sup> -4b                                                                                                                                                    |                                              |
| Gln <sup>18</sup>   | 1  | 175.5                  |                                                                                                              |                                                                                                                                                                                                |                                              |
|                     | 2  | 57.0                   | 4.02, <i>m</i>                                                                                               | Gln <sup>18</sup> -1, Aib <sup>17</sup> -1                                                                                                                                                     | Gln <sup>19</sup> -NH                        |
|                     | 3  | 28.0                   | 2.25, <i>m</i>                                                                                               | Gln <sup>18</sup> -1, Gln <sup>18</sup> -2, Gln <sup>18</sup> -4                                                                                                                               |                                              |
|                     | 4  | 33.2                   | 2.43, <i>dt</i> , (16.1, 8.4)<br>2.62, <i>ddd</i> , (15.4, 9.1, 6.3)                                         | Gln <sup>18</sup> -2, Gln <sup>18</sup> -3, Gln <sup>18</sup> -5<br>Gln <sup>18</sup> -2, Gln <sup>18</sup> -3, Gln <sup>18</sup> -5                                                           |                                              |
|                     | 5  | 177.6                  | 7.79, <i>d</i> , (5.6)<br>6.79, <i>brs</i><br>7.44, <i>brs</i>                                               | Gln <sup>18</sup> -2, Aib <sup>17</sup> -1<br>Gln <sup>18</sup> -3, <sup>18</sup> Gln <sup>18</sup> -5<br>Gln <sup>18</sup> -5                                                                 |                                              |
| Gln <sup>19</sup>   | 1  | 174.0                  |                                                                                                              |                                                                                                                                                                                                |                                              |
|                     | 2  | 55.7                   | 4.15, <i>m</i>                                                                                               | Gln <sup>19</sup> -1, Gln <sup>19</sup> -3, Gln <sup>18</sup> -1                                                                                                                               | Pheol <sup>20</sup> -NH                      |
|                     | 3  | 28.0                   | 2.02, <i>m</i>                                                                                               | Gln <sup>19</sup> -2, Gln <sup>19</sup> -4                                                                                                                                                     |                                              |
|                     | 4  | 32.9                   | 2.20, <i>m</i><br>2.34, <i>m</i>                                                                             | Gln <sup>19</sup> -2, <sup>19</sup> Gln <sup>19</sup> -3, Gln <sup>19</sup> -5<br>Gln <sup>19</sup> -2, <sup>19</sup> Gln <sup>19</sup> -3, Gln <sup>19</sup> -5                               |                                              |
|                     | 5  | 177.3                  | 7.88, <i>d</i> , (7.0)<br>6.63, <i>brs</i><br>7.34, <i>brs</i>                                               | Gln <sup>19</sup> -2, Gln <sup>18</sup> -1<br>Gln <sup>19</sup> -3, Gln <sup>19</sup> -5<br>Gln <sup>19</sup> -5                                                                               | Pheol <sup>20</sup> -2                       |
| Pheol <sup>20</sup> | 1  | 64.9                   | 3.61, <i>brs</i>                                                                                             | Pheol <sup>20</sup> -3                                                                                                                                                                         |                                              |
|                     | 2  | 54.5                   | 4.15, <i>m</i>                                                                                               | Pheol <sup>20</sup> -3                                                                                                                                                                         | Gln <sup>19</sup> -NH                        |
|                     | 3  | 38.0                   | 2.73, <i>dd</i> , (14.0, 9.1)<br>2.94, <i>dd</i> , (14.0, 5.6)                                               | Pheol <sup>20</sup> -1, Pheol <sup>20</sup> -2 Pheol <sup>20</sup> -4, Pheol <sup>20</sup> -5<br>Pheol <sup>20</sup> -1, Pheol <sup>20</sup> -2 Pheol <sup>20</sup> -4, Pheol <sup>20</sup> -5 |                                              |
|                     | 4  | 139.8                  |                                                                                                              |                                                                                                                                                                                                |                                              |
|                     | 5  | 130.4                  | 7.28, <i>d</i> , (7.7)                                                                                       | Pheol <sup>20</sup> -7, Pheol <sup>20</sup> -9                                                                                                                                                 |                                              |
|                     | 6  | 129.1                  | 7.22, <i>t</i> (7.7)                                                                                         | Pheol <sup>20</sup> -4, Pheol <sup>20</sup> -5, Pheol <sup>20</sup> -8                                                                                                                         |                                              |
|                     | 7  | 127.1                  | 7.14, <i>t</i> , (7.7)                                                                                       | Pheol <sup>20</sup> -5, Pheol <sup>20</sup> -9                                                                                                                                                 |                                              |
|                     | 8  | 129.1                  | 7.22, <i>t</i> (7.7)                                                                                         | Pheol <sup>20</sup> -4, Pheol <sup>20</sup> -5, Pheol <sup>20</sup> -6                                                                                                                         |                                              |
|                     | 9  | 130.4                  | 7.28, <i>d</i> , (7.7)                                                                                       | Pheol <sup>20</sup> -5, Pheol <sup>20</sup> -7                                                                                                                                                 |                                              |
| NH                  |    | 7.32, <i>d</i> , (9.1) | Pheol <sup>20</sup> -2, Gln <sup>19</sup> -1                                                                 | Pheol <sup>20</sup> -1, Pheol <sup>20</sup> -2                                                                                                                                                 |                                              |

<sup>a</sup>Signals may be exchangeable

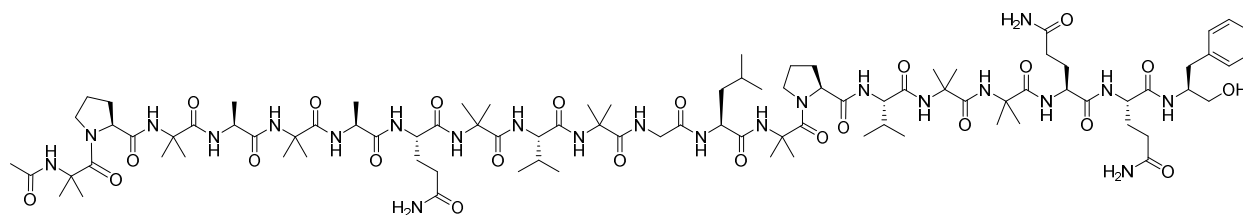

Alamethicin F50 (1)

**Table S4.** NMR data for *ortho*-F-Pheol alamethicin F50 (**2**). Data recorded in CD<sub>3</sub>OH. <sup>1</sup>H (700 MHz), <sup>13</sup>C (175 MHz), and <sup>19</sup>F (470 MHz)

| Compound <b>2</b> ( <i>ortho</i> -F-Pheol-alamethicin F50) |                   |                      |                                            |                                                                  |                                              |
|------------------------------------------------------------|-------------------|----------------------|--------------------------------------------|------------------------------------------------------------------|----------------------------------------------|
| Position                                                   |                   | $\delta_c$           | $\delta_H, m, J$ (Hz)                      | HMBC                                                             | NOESY                                        |
| Ac                                                         | 1                 | 172.5                |                                            |                                                                  |                                              |
|                                                            | 2                 | 22.4                 | 2.05, <i>s</i>                             | Ac-1                                                             |                                              |
| Aib <sup>1</sup>                                           | 1                 | 175.5                |                                            |                                                                  |                                              |
|                                                            | 2                 | 57.4                 |                                            |                                                                  |                                              |
|                                                            | 3                 | 23.8                 | 1.46, <i>s</i>                             | Aib <sup>1</sup> -1, Aib <sup>1</sup> -2, Aib <sup>1</sup> -4    |                                              |
|                                                            | 4                 | 26.6                 | 1.53, <i>s</i>                             | Aib <sup>1</sup> -1, Aib <sup>1</sup> -2                         |                                              |
| Pro <sup>2</sup>                                           | NH                |                      | 8.63, <i>s</i>                             | Ac-1, Aib <sup>1</sup> -1, Aib <sup>1</sup> -2                   | Pro <sup>2</sup> -5a, Pro <sup>2</sup> -5b   |
|                                                            | 1                 | 175.6                |                                            |                                                                  |                                              |
|                                                            | 2                 | 65.7                 | 4.25, <i>t</i> (8.4)                       | Pro <sup>2</sup> -1, Pro <sup>2</sup> -3                         |                                              |
|                                                            | 3                 | 29.7                 | 1.80, <i>m</i>                             | Pro <sup>2</sup> -2, Pro <sup>2</sup> -4                         |                                              |
|                                                            | 4                 | 27.1 <sup>a</sup>    | 2.34, <i>m</i>                             | Pro <sup>2</sup> -2, Pro <sup>2</sup> -4                         |                                              |
| Aib <sup>3</sup>                                           | 5                 | 49.9                 | 1.97, <i>m</i>                             | Pro <sup>2</sup> -3, Pro <sup>2</sup> -5                         |                                              |
|                                                            |                   |                      | 2.08, <i>m</i>                             | Pro <sup>2</sup> -3, Pro <sup>2</sup> -5                         |                                              |
|                                                            |                   |                      | 3.48, <i>td</i> (10.5, 6.3)                | Pro <sup>2</sup> -4                                              | Aib <sup>1</sup> -NH                         |
|                                                            |                   |                      | 3.95, <i>m</i>                             | Pro <sup>2</sup> -4, Aib <sup>1</sup> -1                         | Aib <sup>1</sup> -NH                         |
|                                                            | 1                 | 178.5                |                                            |                                                                  |                                              |
| Ala <sup>4</sup>                                           | 2                 | 57.4                 |                                            |                                                                  |                                              |
|                                                            | 3                 | 23.1                 | 1.54, <i>s</i>                             | Aib <sup>3</sup> -1, Aib <sup>3</sup> -2                         |                                              |
|                                                            | 4                 | 27.4                 | 1.56, <i>s</i>                             | Aib <sup>3</sup> -2                                              |                                              |
|                                                            | NH                |                      | 7.62, <i>s</i>                             | Aib <sup>3</sup> -1, Pro <sup>2</sup> -1                         | Pro <sup>2</sup> -5a                         |
| Aib <sup>5</sup>                                           | 1                 | 177.2                |                                            |                                                                  |                                              |
|                                                            | 2                 | 54.1                 | 4.09, <i>m</i>                             | Ala <sup>4</sup> -1, Ala <sup>4</sup> -3                         | Ala <sup>4</sup> -NH                         |
|                                                            | 3                 | 17.1                 | 1.48, <i>d</i> (7.7)                       | Ala <sup>4</sup> -2                                              |                                              |
|                                                            | NH                |                      | 7.56, <i>d</i> (5.6)                       | Ala <sup>4</sup> -1                                              | Ala <sup>4</sup> -2                          |
| Ala <sup>6</sup>                                           | 1                 | 177.8                |                                            |                                                                  |                                              |
|                                                            | 2                 | 57.3                 |                                            |                                                                  |                                              |
|                                                            | 3                 | 23.1                 | 1.54, <i>s</i>                             | Aib <sup>5</sup> -1                                              |                                              |
|                                                            | 4                 | 27.1                 | 1.56, <i>s</i>                             | Aib <sup>5</sup> -1, Aib <sup>5</sup> -2                         |                                              |
| Gln <sup>7</sup>                                           | NH                |                      | 7.93, <i>s</i>                             | Aib <sup>5</sup> -1, Ala <sup>4</sup> -1                         | Ala <sup>4</sup> -NH                         |
|                                                            | 1                 | 178.1                |                                            |                                                                  |                                              |
|                                                            | 2                 | 53.9                 | 4.02, <i>m</i>                             | Ala <sup>6</sup> -1, Ala <sup>6</sup> -3                         |                                              |
|                                                            | 3                 | 16.9                 | 1.53, <i>d</i> , overlapped                | Ala <sup>6</sup> -2                                              |                                              |
| Aib <sup>8</sup>                                           | NH                |                      | 7.92, <i>brs</i>                           | Ala <sup>6</sup> -2                                              | Ala <sup>6</sup> -2                          |
|                                                            | 1                 | 175.8                |                                            |                                                                  |                                              |
|                                                            | 2                 | 58.1                 | 3.94, <i>m</i>                             | Gln <sup>7</sup> -1, Ala <sup>6</sup> -1                         |                                              |
|                                                            | 3                 | 27.1                 | 2.15, <i>m</i>                             | Gln <sup>7</sup> -2, Gln <sup>7</sup> -4                         |                                              |
|                                                            | 4                 | 32.6                 | 2.30, <i>m</i>                             | Gln <sup>7</sup> -2, Gln <sup>7</sup> -4                         |                                              |
| Val <sup>9</sup>                                           | 5                 | 177.3                | 2.34, <i>m</i>                             | Gln <sup>7</sup> -2, Gln <sup>7</sup> -3, Gln <sup>7</sup> -5    |                                              |
|                                                            | NH                |                      | 2.54, <i>ddd</i> (15.4, 9.8, 5.6)          | Gln <sup>7</sup> -2, Gln <sup>7</sup> -3, Gln <sup>7</sup> -5    |                                              |
|                                                            | 5-NH <sub>2</sub> |                      | 8.00, <i>d</i> (5.6)                       | Gln <sup>7</sup> -2, Ala <sup>6</sup> -1                         | Ala <sup>6</sup> -NH                         |
|                                                            |                   |                      | 6.77, <i>brs</i>                           | Gln <sup>7</sup> -3, Gln <sup>7</sup> -5                         |                                              |
| Aib <sup>10</sup>                                          |                   |                      | 7.44, <i>brs</i>                           | Gln <sup>7</sup> -5                                              |                                              |
|                                                            | 1                 | 178.2                |                                            |                                                                  |                                              |
|                                                            | 2                 | 57.6                 |                                            |                                                                  |                                              |
|                                                            | 3                 | 23.3                 | 1.52, <i>s</i>                             | Aib <sup>8</sup> -1, Aib <sup>8</sup> -2                         |                                              |
| Gly <sup>11</sup>                                          | 4                 | 27.4                 | 1.55, <i>s</i>                             | Aib <sup>8</sup> -1, Aib <sup>8</sup> -2                         |                                              |
|                                                            | NH                |                      | 8.09, <i>s</i>                             | Aib <sup>8</sup> -1, Gln <sup>7</sup> -1                         | Gln <sup>7</sup> -2                          |
|                                                            | 1                 | 175.3                |                                            |                                                                  |                                              |
|                                                            | 2                 | 65.7                 | 3.58, <i>dd</i> (9.8, 3.5)                 | Val <sup>9</sup> -1, Val <sup>9</sup> -3                         | Aib <sup>10</sup> -NH                        |
|                                                            | 3                 | 30.4                 | 2.25, <i>m</i>                             | Val <sup>9</sup> -2,                                             |                                              |
| Leu <sup>12</sup>                                          | 4                 | 19.6                 | 1.00, <i>d</i> (6.3)                       | Val <sup>9</sup> -2, Val <sup>9</sup> -3                         |                                              |
|                                                            | 5                 | 20.8                 | 1.13, <i>d</i> (6.3)                       | Val <sup>9</sup> -2, Val <sup>9</sup> -3                         |                                              |
|                                                            | NH                |                      | 7.49, <i>d</i> (4.9)                       | Val <sup>9</sup> -2, Aib <sup>8</sup> -1                         |                                              |
|                                                            | 1                 | 179.0                |                                            |                                                                  |                                              |
|                                                            | 2                 | 57.6                 |                                            |                                                                  |                                              |
|                                                            | 3                 | 26.8                 | 1.54, <i>s</i>                             | Aib <sup>10</sup> -1, Val <sup>9</sup> -1                        |                                              |
| Val <sup>9</sup>                                           | 4                 | 27.1                 | 1.56, <i>s</i>                             | Aib <sup>10</sup> -1, Aib <sup>10</sup> -2,                      |                                              |
|                                                            | NH                |                      | 8.22, <i>s</i>                             |                                                                  | Val <sup>9</sup> -2, Gly <sup>11</sup> -2b   |
|                                                            | 1                 | 173.0                |                                            |                                                                  |                                              |
| Gly <sup>11</sup>                                          | 2                 | 45.1                 | 3.67, <i>m</i>                             | Gly <sup>11</sup> -1                                             |                                              |
|                                                            |                   |                      | 3.94, <i>m</i>                             | Gly <sup>11</sup> -2, Aib <sup>10</sup> -1                       |                                              |
|                                                            | NH                |                      | 8.34, <i>brt</i> (5.6)                     | Gly <sup>11</sup> -1, Aib <sup>10</sup> -1                       | Gly <sup>11</sup> -2a, Gly <sup>11</sup> -2b |
| Aib <sup>13</sup>                                          | 1                 | 175.8                |                                            |                                                                  |                                              |
|                                                            | 2                 | 54.1                 | 4.46, <i>m</i>                             | Leu <sup>12</sup> -1, Leu <sup>12</sup> -3, Leu <sup>12</sup> -4 |                                              |
|                                                            | 3                 | 41.5                 | 1.59, overlapped                           | Leu <sup>12</sup> -4,                                            |                                              |
|                                                            |                   |                      | 1.96, <i>m</i>                             | Leu <sup>12</sup> -2, Leu <sup>12</sup> -4                       |                                              |
|                                                            | 4                 | 25.6                 | 1.91, <i>m</i>                             | Leu <sup>12</sup> -3                                             |                                              |
|                                                            | 5                 | 21.3                 | 0.92, <i>d</i> (6.3)                       | Leu <sup>12</sup> -3, Leu <sup>12</sup> -4                       |                                              |
|                                                            | 6                 | 23.4                 | 0.94, <i>d</i> (6.3)                       | Leu <sup>12</sup> -3, Leu <sup>12</sup> -4                       |                                              |
| NH                                                         |                   | 8.11, <i>d</i> (8.4) | Leu <sup>12</sup> -2, Gly <sup>11</sup> -1 | Gly <sup>11</sup> -2a, Gly <sup>11</sup> -2b                     |                                              |
| Aib <sup>13</sup>                                          | 1                 | 174.9                |                                            |                                                                  |                                              |
|                                                            | 2                 | 58.1                 |                                            |                                                                  |                                              |
|                                                            | 3                 | 23.7                 | 1.61, <i>s</i>                             | Aib <sup>13</sup> -1, Aib <sup>13</sup> -2, Aib <sup>13</sup> -4 |                                              |

|                       |                   |                           |                               |                                                                                                        |                                              |                                                    |
|-----------------------|-------------------|---------------------------|-------------------------------|--------------------------------------------------------------------------------------------------------|----------------------------------------------|----------------------------------------------------|
|                       | 4                 | 26.7                      | 1.54, <i>s</i>                | Aib <sup>13</sup> -1, Aib <sup>13</sup> -2                                                             |                                              |                                                    |
|                       | NH                |                           | 8.40, <i>s</i>                | Aib <sup>13</sup> -1, Leu <sup>12</sup> -1                                                             | Pro <sup>14</sup> -5a, Pro <sup>14</sup> -5b |                                                    |
| Pro <sup>14</sup>     | 1                 | 176.4                     |                               | Pro <sup>14</sup> -1, Pro <sup>14</sup> -3, Pro <sup>14</sup> -4                                       |                                              |                                                    |
|                       | 2                 | 64.6                      | 4.38, <i>dd</i> , (9.1, 6.3)  | Pro <sup>14</sup> -2, Pro <sup>14</sup> -4, Pro <sup>14</sup> -5                                       |                                              |                                                    |
|                       | 3                 | 30.0                      | 1.80, <i>m</i>                | Pro <sup>14</sup> -2, Pro <sup>14</sup> -4, Pro <sup>14</sup> -5                                       |                                              |                                                    |
|                       | 4                 | 26.9 <sup>a</sup>         | 1.99, <i>m</i>                | Pro <sup>14</sup> -2, Pro <sup>14</sup> -3, Pro <sup>14</sup> -5                                       |                                              |                                                    |
|                       | 5                 | 50.6                      | 2.08, <i>m</i>                | Pro <sup>14</sup> -2, Pro <sup>14</sup> -3, Pro <sup>14</sup> -5                                       |                                              |                                                    |
|                       | NH                |                           | 3.73, <i>m</i>                | Pro <sup>14</sup> -3, Pro <sup>14</sup> -4                                                             |                                              |                                                    |
|                       |                   |                           | 3.88, <i>dt</i> , (11.2, 6.3) | Pro <sup>14</sup> -3, Pro <sup>14</sup> -4, Aib <sup>13</sup> -1                                       | Aib <sup>13</sup> -NH                        |                                                    |
| Val <sup>15</sup>     | 1                 | 175.3                     |                               | Val <sup>15</sup> -1, Val <sup>15</sup> -3                                                             |                                              |                                                    |
|                       | 2                 | 64.3                      | 3.73, <i>m</i>                | Val <sup>15</sup> -1, Val <sup>15</sup> -3                                                             |                                              |                                                    |
|                       | 3                 | 30.5                      | 2.34, <i>m</i>                | Val <sup>15</sup> -2                                                                                   |                                              |                                                    |
|                       | 4                 | 19.4                      | 0.97, <i>d</i> , (6.3)        | Val <sup>15</sup> -2, Val <sup>15</sup> -3                                                             |                                              |                                                    |
|                       | 5                 | 20.2                      | 1.07, <i>d</i> , (6.3)        | Val <sup>15</sup> -2, Val <sup>15</sup> -3                                                             |                                              |                                                    |
|                       | NH                |                           | 7.63, <i>d</i> , overlapped   | Val <sup>15</sup> -2, Pro <sup>14</sup> -1                                                             | Pro <sup>14</sup> -5a                        |                                                    |
| Aib <sup>16</sup>     | 1                 | 177.6                     |                               | Aib <sup>16</sup> -1, Aib <sup>16</sup> -2, Aib <sup>16</sup> -4                                       |                                              |                                                    |
|                       | 2                 | 57.6                      |                               | Aib <sup>16</sup> -1, Aib <sup>16</sup> -2                                                             |                                              |                                                    |
|                       | 3                 | 23.4                      | 1.54, <i>s</i>                | Aib <sup>16</sup> -1, Aib <sup>16</sup> -2, Aib <sup>16</sup> -4, Val <sup>15</sup> -1                 | Val <sup>15</sup> -2                         |                                                    |
|                       | 4                 | 27.4                      | 1.54, <i>s</i>                | Aib <sup>16</sup> -1, Aib <sup>16</sup> -2, Aib <sup>16</sup> -4, Val <sup>15</sup> -1                 | Val <sup>15</sup> -2                         |                                                    |
|                       | NH                |                           | 7.58, <i>s</i>                | Aib <sup>16</sup> -1, Aib <sup>16</sup> -2, Aib <sup>16</sup> -4, Val <sup>15</sup> -1                 | Val <sup>15</sup> -2                         |                                                    |
| Aib <sup>17</sup>     | 1                 | 178.8                     |                               | Aib <sup>17</sup> -1, Aib <sup>17</sup> -2                                                             |                                              |                                                    |
|                       | 2                 | 57.7                      |                               | Aib <sup>17</sup> -1, Aib <sup>17</sup> -2                                                             |                                              |                                                    |
|                       | 3                 | 23.4                      | 1.53, <i>s</i>                | Aib <sup>17</sup> -1, Aib <sup>17</sup> -2                                                             |                                              |                                                    |
|                       | 4                 | 27.4                      | 1.55, <i>s</i>                | Aib <sup>17</sup> -1, Aib <sup>17</sup> -2                                                             |                                              |                                                    |
|                       | NH                |                           | 7.81, <i>s</i>                | Aib <sup>17</sup> -1, Aib <sup>17</sup> -2, Aib <sup>17</sup> -3, Aib <sup>16</sup> -1                 | Gln <sup>18</sup> -3, Gln <sup>18</sup> -4b  |                                                    |
| Gln <sup>18</sup>     | 1                 | 175.6                     |                               | Gln <sup>18</sup> -1, Aib <sup>17</sup> -1                                                             | Gln <sup>19</sup> -NH                        |                                                    |
|                       | 2                 | 57.0                      | 4.01, <i>m</i>                | Gln <sup>18</sup> -1, Gln <sup>18</sup> -2, Gln <sup>18</sup> -4                                       |                                              |                                                    |
|                       | 3                 | 28.0                      | 2.25, <i>m</i>                | Gln <sup>18</sup> -2, Gln <sup>18</sup> -3, Gln <sup>18</sup> -5                                       |                                              |                                                    |
|                       | 4                 | 33.2                      | 2.43, <i>dt</i> , (15.4, 8.4) | Gln <sup>18</sup> -2, Gln <sup>18</sup> -3, Gln <sup>18</sup> -5                                       |                                              |                                                    |
|                       | 5                 | 177.4                     | 2.62, <i>dt</i> , (15.4, 7.7) | Gln <sup>18</sup> -2, Gln <sup>18</sup> -3, Gln <sup>18</sup> -5                                       |                                              |                                                    |
|                       | NH                |                           | 7.78, <i>d</i> , (5.6)        | Gln <sup>18</sup> -2, Aib <sup>17</sup> -1                                                             |                                              |                                                    |
|                       | 5-NH <sub>2</sub> |                           | 6.78, <i>brs</i>              | Gln <sup>18</sup> -3, Gln <sup>18</sup> -5                                                             |                                              |                                                    |
|                       |                   |                           | 7.44, <i>brs</i>              | Gln <sup>18</sup> -5                                                                                   |                                              |                                                    |
| Gln <sup>19</sup>     | 1                 | 174.1                     |                               | Gln <sup>19</sup> -1, Gln <sup>19</sup> -3, Gln <sup>18</sup> -1                                       | Pheol <sup>20</sup> -NH                      |                                                    |
|                       | 2                 | 55.7                      | 4.15, <i>m</i>                | Gln <sup>19</sup> -2, Gln <sup>19</sup> -4                                                             |                                              |                                                    |
|                       | 3                 | 27.9                      | 1.99, <i>m</i>                | Gln <sup>19</sup> -2, Gln <sup>19</sup> -3, Gln <sup>19</sup> -5                                       |                                              |                                                    |
|                       | 4                 | 32.9                      | 2.19, <i>m</i>                | Gln <sup>19</sup> -2, Gln <sup>19</sup> -3, Gln <sup>19</sup> -5                                       |                                              |                                                    |
|                       | 5                 | 177.3                     | 2.34, <i>m</i>                | Gln <sup>19</sup> -2, Gln <sup>19</sup> -3, Gln <sup>19</sup> -5                                       |                                              |                                                    |
|                       | NH                |                           | 7.86, <i>d</i> , (7.7)        | Gln <sup>19</sup> -2, Gln <sup>18</sup> -1                                                             | Pheol <sup>20</sup> -2                       |                                                    |
|                       | 5-NH <sub>2</sub> |                           | 6.62, <i>brs</i>              | Gln <sup>19</sup> -3, Gln <sup>19</sup> -5                                                             |                                              |                                                    |
|                       |                   |                           | 7.35, <i>brs</i>              | Gln <sup>19</sup> -5                                                                                   |                                              |                                                    |
| F-Pheol <sup>20</sup> | 1                 | 65.1                      | 3.65, <i>brt</i>              | F-Pheol <sup>20</sup> -3                                                                               |                                              |                                                    |
|                       | 2                 | 52.9                      | 4.25, <i>m</i>                | F-Pheol <sup>20</sup> -3                                                                               | Gln <sup>19</sup> -NH                        |                                                    |
|                       | 3                 | 31.1                      | 2.70, <i>dd</i> , (14.0, 9.1) | F-Pheol <sup>20</sup> -1, F-Pheol <sup>20</sup> -2, F-Pheol <sup>20</sup> -4, F-Pheol <sup>20</sup> -5 |                                              |                                                    |
|                       | 4                 |                           | 3.07, <i>dd</i> , (14.0, 4.9) | F-Pheol <sup>20</sup> -1, F-Pheol <sup>20</sup> -2, F-Pheol <sup>20</sup> -4, F-Pheol <sup>20</sup> -5 |                                              |                                                    |
|                       | 5                 | 126.5, <i>d</i> , (15.4)  |                               |                                                                                                        |                                              |                                                    |
|                       | 6                 | 162.6, <i>d</i> , (242.7) |                               |                                                                                                        |                                              |                                                    |
|                       | 7                 | 115.5, <i>d</i> , (22.1)  | 6.99, <i>t</i> , (9.1)        | F-Pheol <sup>20</sup> -4, F-Pheol <sup>20</sup> -5, F-Pheol <sup>20</sup> -8                           |                                              |                                                    |
|                       | 8                 | 129.1, <i>d</i> , (8.4)   | 7.18, <i>dd</i> , (7.1, 7.0)  | F-Pheol <sup>20</sup> -5, F-Pheol <sup>20</sup> -9                                                     |                                              |                                                    |
|                       | 9                 | 124.9, <i>d</i> , (3.7)   | 7.04, <i>t</i> , (7.7)        | F-Pheol <sup>20</sup> -4, F-Pheol <sup>20</sup> -6                                                     |                                              |                                                    |
|                       | 10                | 132.9, <i>d</i> , (4.4)   | 7.37, <i>t</i> , (7.7)        | F-Pheol <sup>20</sup> -5, F-Pheol <sup>20</sup> -7                                                     |                                              |                                                    |
|                       |                   | 1-OH                      |                               | 5.23, <i>t</i> , (6.6)                                                                                 |                                              |                                                    |
|                       |                   | NH                        |                               | 7.32, <i>d</i> , (9.1)                                                                                 | Gln <sup>19</sup> -1                         | F-Pheol <sup>20</sup> -1, F-Pheol <sup>20</sup> -2 |
|                       |                   | F                         |                               | -119.7*, <i>m</i>                                                                                      |                                              |                                                    |

\*Recorded at 470 MHz

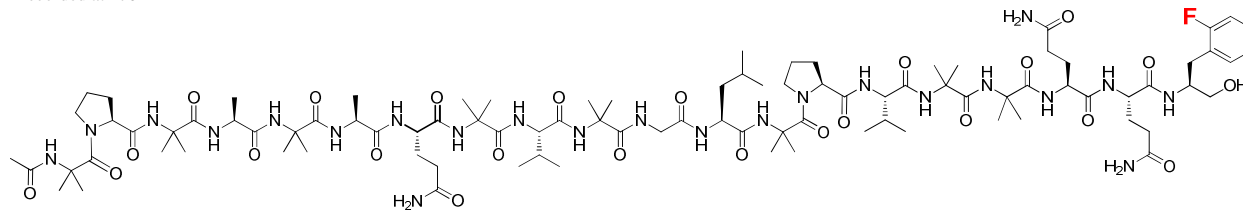

*ortho*-F-Pheol alamethicin F50 (2)

**Table S5.** NMR data for *meta*-F-Pheol alamethicin F50 (**3**). Data recorded in CD<sub>3</sub>OH. <sup>1</sup>H (700 MHz), <sup>13</sup>C (175 MHz), and <sup>19</sup>F (470 MHz)

| Compound <b>3</b> ( <i>meta</i> -F-Pheol-alamethicin F50) |                   |                        |                                            |                                                                  |                                              |
|-----------------------------------------------------------|-------------------|------------------------|--------------------------------------------|------------------------------------------------------------------|----------------------------------------------|
| residue                                                   | position          | $\delta_c$             | $\delta_H, m, J$ (Hz)                      | HMBC                                                             | NOESY                                        |
| Ac                                                        | 1                 | 172.5                  |                                            |                                                                  |                                              |
|                                                           | 2                 | 22.4                   |                                            | Ac-1                                                             |                                              |
| Aib <sup>1</sup>                                          | 1                 | 175.5                  |                                            |                                                                  |                                              |
|                                                           | 2                 | 57.4                   |                                            |                                                                  |                                              |
|                                                           | 3                 | 23.8                   | 1.46, <i>s</i>                             | Aib <sup>1</sup> -1, Aib <sup>1</sup> -2, Aib <sup>1</sup> -4    |                                              |
|                                                           | 4                 | 26.6                   | 1.54, <i>s</i>                             | Aib <sup>1</sup> -1, Aib <sup>1</sup> -2                         |                                              |
| Pro <sup>2</sup>                                          | NH                |                        | 8.64, <i>s</i>                             | Ac-1, Aib <sup>1</sup> -1, Aib <sup>1</sup> -2                   | Pro <sup>2</sup> -5a, Pro <sup>2</sup> -5b   |
|                                                           | 1                 | 175.6                  |                                            |                                                                  |                                              |
|                                                           | 2                 | 65.7                   | 4.25, <i>t</i> (8.4)                       | Pro <sup>2</sup> -1, Pro <sup>2</sup> -3                         |                                              |
|                                                           | 3                 | 29.7                   | 1.80, <i>m</i>                             | Pro <sup>2</sup> -2, Pro <sup>2</sup> -4                         |                                              |
|                                                           | 4                 | 27.1 <sup>a</sup>      | 2.34, <i>m</i>                             | Pro <sup>2</sup> -2, Pro <sup>2</sup> -4                         |                                              |
| Aib <sup>3</sup>                                          | 5                 | 49.9                   | 1.97, <i>m</i>                             | Pro <sup>2</sup> -3, Pro <sup>2</sup> -5                         |                                              |
|                                                           |                   |                        | 2.08, <i>m</i>                             | Pro <sup>2</sup> -3, Pro <sup>2</sup> -5                         |                                              |
|                                                           |                   |                        | 3.49, <i>td</i> , (10.5, 6.3)              | Pro <sup>2</sup> -4                                              | Aib <sup>1</sup> -NH                         |
|                                                           |                   |                        | 3.95, <i>m</i>                             | Pro <sup>2</sup> -4, Aib <sup>1</sup> -1                         | Aib <sup>1</sup> -NH                         |
|                                                           | 1                 | 178.5                  |                                            |                                                                  |                                              |
| Ala <sup>4</sup>                                          | 2                 | 57.4                   |                                            |                                                                  |                                              |
|                                                           | 3                 | 23.1                   | 1.54, <i>s</i>                             | Aib <sup>3</sup> -1, Aib <sup>3</sup> -2                         |                                              |
|                                                           | 4                 | 27.4                   | 1.56, <i>s</i>                             | Aib <sup>3</sup> -2                                              |                                              |
|                                                           | NH                |                        | 7.62, <i>s</i>                             | Aib <sup>3</sup> -1, Pro <sup>2</sup> -1                         | Pro <sup>2</sup> -5a                         |
|                                                           | 1                 | 177.2                  |                                            |                                                                  |                                              |
| Aib <sup>5</sup>                                          | 2                 | 54.1                   | 4.09, <i>m</i>                             | Ala <sup>4</sup> -1, Ala <sup>4</sup> -3                         | Ala <sup>4</sup> -NH                         |
|                                                           | 3                 | 17.0                   | 1.48, <i>d</i> , (7.7)                     | Ala <sup>4</sup> -2                                              |                                              |
|                                                           | NH                |                        | 7.56, <i>d</i> , (4.2)                     | Ala <sup>4</sup> -1                                              | Ala <sup>4</sup> -2                          |
|                                                           | 1                 | 177.8                  |                                            |                                                                  |                                              |
| Ala <sup>6</sup>                                          | 2                 | 57.3                   |                                            |                                                                  |                                              |
|                                                           | 3                 | 23.1                   | 1.54, <i>s</i>                             | Aib <sup>5</sup> -1                                              |                                              |
|                                                           | 4                 | 27.1                   | 1.56, <i>s</i>                             | Aib <sup>5</sup> -1, Aib <sup>5</sup> -2                         |                                              |
|                                                           | NH                |                        | 7.93, <i>s</i>                             | Aib <sup>5</sup> -1, Ala <sup>4</sup> -1                         | Ala <sup>4</sup> -NH                         |
| Gln <sup>7</sup>                                          | 1                 | 178.1                  |                                            |                                                                  |                                              |
|                                                           | 2                 | 53.8                   | 4.01, <i>m</i>                             | Ala <sup>6</sup> -1, Ala <sup>6</sup> -3                         |                                              |
|                                                           | 3                 | 16.9                   | 1.53, <i>d</i> , overlapped                | Ala <sup>6</sup> -2                                              |                                              |
|                                                           | NH                |                        | 7.91, <i>brs</i>                           | Ala <sup>6</sup> -2                                              | Ala <sup>6</sup> -2                          |
|                                                           | 1                 | 175.8                  |                                            |                                                                  |                                              |
| Aib <sup>8</sup>                                          | 2                 | 58.1                   | 3.94, <i>m</i>                             | Gln <sup>7</sup> -1, Ala <sup>6</sup> -1                         |                                              |
|                                                           | 3                 | 27.3                   | 2.15, <i>m</i>                             | Gln <sup>7</sup> -2, Gln <sup>7</sup> -4                         |                                              |
|                                                           | 4                 | 32.5                   | 2.30, <i>m</i>                             | Gln <sup>7</sup> -2, Gln <sup>7</sup> -4                         |                                              |
|                                                           |                   |                        | 2.34, <i>m</i>                             | Gln <sup>7</sup> -2, Gln <sup>7</sup> -3, Gln <sup>7</sup> -5    |                                              |
|                                                           | 5                 | 177.1                  | 2.54, <i>ddd</i> , (15.4, 9.8, 6.3)        | Gln <sup>7</sup> -2, Gln <sup>7</sup> -3, Gln <sup>7</sup> -5    |                                              |
|                                                           | NH                |                        | 7.99, <i>d</i> , (4.9)                     | Gln <sup>7</sup> -2, Ala <sup>6</sup> -1                         | Ala <sup>6</sup> -NH                         |
|                                                           | 5-NH <sub>2</sub> |                        | 6.77, <i>brs</i>                           | Gln <sup>7</sup> -3, Gln <sup>7</sup> -5                         |                                              |
|                                                           |                   | 7.45, <i>brs</i>       | Gln <sup>7</sup> -5                        |                                                                  |                                              |
| Val <sup>9</sup>                                          | 1                 | 178.2                  |                                            |                                                                  |                                              |
|                                                           | 2                 | 57.6                   |                                            |                                                                  |                                              |
|                                                           | 3                 | 23.3                   | 1.52, <i>s</i>                             | Aib <sup>8</sup> -1, Aib <sup>8</sup> -2                         |                                              |
|                                                           | 4                 | 27.4                   | 1.55, <i>s</i>                             | Aib <sup>8</sup> -1, Aib <sup>8</sup> -2                         |                                              |
|                                                           | NH                |                        | 8.08, <i>s</i>                             | Aib <sup>8</sup> -1, Gln <sup>7</sup> -1                         | Gln <sup>7</sup> -2                          |
| Aib <sup>10</sup>                                         | 1                 | 175.3                  |                                            |                                                                  |                                              |
|                                                           | 2                 | 65.7                   | 3.58, <i>dd</i> , (9.3, 3.2)               | Val <sup>9</sup> -1, Val <sup>9</sup> -3                         | Aib <sup>10</sup> -NH                        |
|                                                           | 3                 | 30.6                   | 2.25, <i>m</i>                             | Val <sup>9</sup> -2,                                             |                                              |
|                                                           | 4                 | 19.6                   | 1.00, <i>d</i> , (6.4)                     | Val <sup>9</sup> -2, Val <sup>9</sup> -3                         |                                              |
|                                                           | 5                 | 20.8                   | 1.13, <i>d</i> , (6.3)                     | Val <sup>9</sup> -2, Val <sup>9</sup> -3                         |                                              |
| Gly <sup>11</sup>                                         | NH                |                        | 7.49, <i>d</i> , (4.9)                     | Val <sup>9</sup> -2, Aib <sup>8</sup> -1                         |                                              |
|                                                           | 1                 | 179.0                  |                                            |                                                                  |                                              |
|                                                           | 2                 | 57.6                   |                                            |                                                                  |                                              |
|                                                           | 3                 | 26.8                   | 1.54, <i>s</i>                             | Aib <sup>10</sup> -1, Val <sup>9</sup> -1                        |                                              |
| Leu <sup>12</sup>                                         | 4                 | 27.1                   | 1.56, <i>s</i>                             | Aib <sup>10</sup> -1, Aib <sup>10</sup> -2,                      | Val <sup>9</sup> -2, Gly <sup>11</sup> -2b   |
|                                                           | NH                |                        | 8.22, <i>s</i>                             |                                                                  |                                              |
|                                                           | 1                 | 173.0                  |                                            | Gly <sup>11</sup> -1                                             |                                              |
| Aib <sup>13</sup>                                         | 2                 | 45.0                   | 3.67, <i>dd</i> (16.8, 5.6)                | Gly <sup>11</sup> -1                                             |                                              |
|                                                           | 3                 | 26.8                   | 3.95, <i>m</i>                             | Gly <sup>11</sup> -2, Aib <sup>10</sup> -1                       |                                              |
|                                                           |                   |                        | 8.34, <i>brt</i> , (5.7)                   | Gly <sup>11</sup> -1, Aib <sup>10</sup> -1                       | Gly <sup>11</sup> -2a, Gly <sup>11</sup> -2b |
|                                                           | 1                 | 175.8                  |                                            |                                                                  |                                              |
|                                                           | 2                 | 54.0                   | 4.45, <i>m</i>                             | Leu <sup>12</sup> -1, Leu <sup>12</sup> -3, Leu <sup>12</sup> -4 |                                              |
|                                                           | 3                 | 41.5                   | 1.59, overlapped                           | Leu <sup>12</sup> -4,                                            |                                              |
|                                                           | 4                 | 25.6                   | 1.96, <i>m</i>                             | Leu <sup>12</sup> -2, Leu <sup>12</sup> -4                       |                                              |
| 5                                                         | 21.3              | 1.91, <i>m</i>         | Leu <sup>12</sup> -3                       |                                                                  |                                              |
| 6                                                         | 23.4              | 0.92, <i>d</i> , (6.3) | Leu <sup>12</sup> -3, Leu <sup>12</sup> -4 |                                                                  |                                              |
| NH                                                        |                   | 0.94, <i>d</i> , (6.3) | Leu <sup>12</sup> -3, Leu <sup>12</sup> -4 |                                                                  |                                              |
| Aib <sup>13</sup>                                         |                   |                        | 8.11, <i>d</i> , (7.8)                     | Leu <sup>12</sup> -2, Gly <sup>11</sup> -1                       | Gly <sup>11</sup> -2a, Gly <sup>11</sup> -2b |
|                                                           | 1                 | 174.9                  |                                            |                                                                  |                                              |
|                                                           | 2                 | 58.1                   |                                            |                                                                  |                                              |
| Aib <sup>13</sup>                                         | 3                 | 23.7                   | 1.61, <i>s</i>                             | Aib <sup>13</sup> -1, Aib <sup>13</sup> -2, Aib <sup>13</sup> -4 |                                              |



|                       |                   |                           |                               |                                                                                                        |                                              |                                                    |
|-----------------------|-------------------|---------------------------|-------------------------------|--------------------------------------------------------------------------------------------------------|----------------------------------------------|----------------------------------------------------|
|                       | 4                 | 26.6                      | 1.54, <i>s</i>                | Aib <sup>13</sup> -1, Aib <sup>13</sup> -2                                                             |                                              |                                                    |
|                       | NH                |                           | 8.40, <i>s</i>                | Aib <sup>13</sup> -1, Leu <sup>12</sup> -1                                                             | Pro <sup>14</sup> -5a, Pro <sup>14</sup> -5b |                                                    |
| Pro <sup>14</sup>     | 1                 | 176.4                     |                               |                                                                                                        |                                              |                                                    |
|                       | 2                 | 64.6                      | 4.39, <i>dd</i> , (8.9, 6.5)  | Pro <sup>14</sup> -1, Pro <sup>14</sup> -3, Pro <sup>14</sup> -4                                       |                                              |                                                    |
|                       | 3                 | 30.0                      | 1.80, <i>m</i>                | Pro <sup>14</sup> -2, Pro <sup>14</sup> -4, Pro <sup>14</sup> -5                                       |                                              |                                                    |
|                       |                   |                           | 2.35, <i>m</i>                | Pro <sup>14</sup> -2, Pro <sup>14</sup> -4, Pro <sup>14</sup> -5                                       |                                              |                                                    |
|                       | 4                 | 26.9 <sup>a</sup>         | 1.99, <i>m</i>                | Pro <sup>14</sup> -2, Pro <sup>14</sup> -3, Pro <sup>14</sup> -5                                       |                                              |                                                    |
|                       |                   |                           | 2.08, <i>m</i>                | Pro <sup>14</sup> -2, Pro <sup>14</sup> -3, Pro <sup>14</sup> -5                                       |                                              |                                                    |
|                       |                   |                           | 3.73, <i>m</i>                | Pro <sup>14</sup> -3, Pro <sup>14</sup> -4                                                             |                                              |                                                    |
|                       | 5                 | 50.5                      | 3.88, <i>dt</i> , (11.9, 6.2) | Pro <sup>14</sup> -3, Pro <sup>14</sup> -4, Aib <sup>13</sup> -1                                       | Aib <sup>13</sup> -NH                        |                                                    |
| Val <sup>15</sup>     | 1                 | 175.3                     |                               |                                                                                                        |                                              |                                                    |
|                       | 2                 | 64.3                      | 3.73, <i>m</i>                | Val <sup>15</sup> -1, Val <sup>15</sup> -3                                                             |                                              |                                                    |
|                       | 3                 | 30.5                      | 2.34, <i>m</i>                | Val <sup>15</sup> -2                                                                                   |                                              |                                                    |
|                       | 4                 | 19.4                      | 0.98, <i>d</i> , (6.5)        | Val <sup>15</sup> -2, Val <sup>15</sup> -3                                                             |                                              |                                                    |
|                       | 5                 | 20.2                      | 1.07, <i>d</i> , (6.4)        | Val <sup>15</sup> -2, Val <sup>15</sup> -3                                                             |                                              |                                                    |
|                       | NH                |                           | 7.63, <i>d</i> (8.0)          | Val <sup>15</sup> -2, Pro <sup>14</sup> -1                                                             | Pro <sup>14</sup> -5a                        |                                                    |
| Aib <sup>16</sup>     | 1                 | 177.6                     |                               |                                                                                                        |                                              |                                                    |
|                       | 2                 | 57.6                      |                               |                                                                                                        |                                              |                                                    |
|                       | 3                 | 23.4                      | 1.54, <i>s</i>                | Aib <sup>16</sup> -1, Aib <sup>16</sup> -2, Aib <sup>16</sup> -4                                       |                                              |                                                    |
|                       | 4                 | 27.4                      | 1.54, <i>s</i>                | Aib <sup>16</sup> -1, Aib <sup>16</sup> -2                                                             |                                              |                                                    |
|                       | NH                |                           | 7.59, <i>s</i>                | Aib <sup>16</sup> -1, Aib <sup>16</sup> -2, Aib <sup>16</sup> -4, Val <sup>15</sup> -1                 | Val <sup>15</sup> -2                         |                                                    |
| Aib <sup>17</sup>     | 1                 | 178.8                     |                               |                                                                                                        |                                              |                                                    |
|                       | 2                 | 57.7                      |                               |                                                                                                        |                                              |                                                    |
|                       | 3                 | 23.4                      | 1.53, <i>s</i>                | Aib <sup>17</sup> -1, Aib <sup>17</sup> -2                                                             |                                              |                                                    |
|                       | 4                 | 27.4                      | 1.55, <i>s</i>                | Aib <sup>17</sup> -1, Aib <sup>17</sup> -2                                                             |                                              |                                                    |
|                       | NH                |                           | 7.81, <i>s</i>                | Aib <sup>17</sup> -1, Aib <sup>17</sup> -2, Aib <sup>17</sup> -3, Aib <sup>16</sup> -1                 | Gln <sup>18</sup> -3, Gln <sup>18</sup> -4b  |                                                    |
| Gln <sup>18</sup>     | 1                 | 175.5                     |                               |                                                                                                        |                                              |                                                    |
|                       | 2                 | 57.0                      | 4.01, <i>m</i>                | Gln <sup>18</sup> -1, Aib <sup>17</sup> -1                                                             | Gln <sup>19</sup> -NH                        |                                                    |
|                       | 3                 | 28.0                      | 2.25, <i>m</i>                | Gln <sup>18</sup> -1, Gln <sup>18</sup> -2, Gln <sup>18</sup> -4                                       |                                              |                                                    |
|                       | 4                 | 33.1                      | 2.43, <i>dt</i> , (15.5, 8.6) | Gln <sup>18</sup> -2, Gln <sup>18</sup> -3, Gln <sup>18</sup> -5                                       |                                              |                                                    |
|                       |                   |                           | 2.62, <i>dt</i> , (15.2, 8.0) | Gln <sup>18</sup> -2, Gln <sup>18</sup> -3, Gln <sup>18</sup> -5                                       |                                              |                                                    |
|                       | 5                 | 177.4                     |                               |                                                                                                        |                                              |                                                    |
|                       | NH                |                           | 7.79, <i>d</i> , (5.4)        | Gln <sup>18</sup> -2, Aib <sup>17</sup> -1                                                             |                                              |                                                    |
|                       | 5-NH <sub>2</sub> |                           | 6.79, <i>brs</i>              | Gln <sup>18</sup> -3, Gln <sup>18</sup> -5                                                             |                                              |                                                    |
|                       |                   |                           | 7.45, <i>brs</i>              | Gln <sup>18</sup> -5                                                                                   |                                              |                                                    |
| Gln <sup>19</sup>     | 1                 | 174.0                     |                               |                                                                                                        |                                              |                                                    |
|                       | 2                 | 55.6                      | 4.16, <i>m</i>                | Gln <sup>19</sup> -1, Gln <sup>19</sup> -3, Gln <sup>18</sup> -1                                       | Pheol <sup>20</sup> -NH                      |                                                    |
|                       | 3                 | 27.9                      | 2.01-2.05, <i>m</i>           | Gln <sup>19</sup> -2, Gln <sup>19</sup> -4                                                             |                                              |                                                    |
|                       | 4                 | 32.9                      | 2.23, <i>m</i>                | Gln <sup>19</sup> -2, Gln <sup>19</sup> -3, Gln <sup>19</sup> -5                                       |                                              |                                                    |
|                       |                   |                           | 2.34, <i>m</i>                | Gln <sup>19</sup> -2, Gln <sup>19</sup> -3, Gln <sup>19</sup> -5                                       |                                              |                                                    |
|                       | 5                 | 177.3                     |                               |                                                                                                        |                                              |                                                    |
|                       | NH                |                           | 7.87, <i>d</i> , (7.5)        | Gln <sup>19</sup> -2, Gln <sup>18</sup> -1                                                             | Pheol <sup>20</sup> -2                       |                                                    |
|                       | 5-NH <sub>2</sub> |                           | 6.63, <i>brs</i>              | Gln <sup>19</sup> -3, Gln <sup>19</sup> -5                                                             |                                              |                                                    |
|                       |                   |                           | 7.35, <i>brs</i>              | Gln <sup>19</sup> -5                                                                                   |                                              |                                                    |
| F-Pheol <sup>20</sup> | 1                 | 64.9                      | 3.63, <i>brt</i>              | F-Pheol <sup>20</sup> -3                                                                               |                                              |                                                    |
|                       | 2                 | 54.0                      | 4.16, <i>m</i>                | F-Pheol <sup>20</sup> -3                                                                               | Gln <sup>19</sup> -NH                        |                                                    |
|                       | 3                 | 37.7                      | 2.72, <i>dd</i> , (14.2, 9.7) | F-Pheol <sup>20</sup> -1, F-Pheol <sup>20</sup> -2, F-Pheol <sup>20</sup> -4, F-Pheol <sup>20</sup> -5 |                                              |                                                    |
|                       |                   |                           | 2.98, <i>dd</i> , (13.9, 4.8) | F-Pheol <sup>20</sup> -1, F-Pheol <sup>20</sup> -2, F-Pheol <sup>20</sup> -4, F-Pheol <sup>20</sup> -5 |                                              |                                                    |
|                       | 4                 | 142.6, <i>d</i> , (7.4)   |                               |                                                                                                        |                                              |                                                    |
|                       | 5                 | 117.1, <i>d</i> , (21.0)  | 7.06, <i>brd</i> (10.2)       | F-Pheol <sup>20</sup> -4                                                                               |                                              |                                                    |
|                       | 6                 | 160.0, <i>d</i> , (242.4) |                               |                                                                                                        |                                              |                                                    |
|                       | 7                 | 113.8, <i>d</i> , (21.0)  | 6.88, <i>td</i> , (8.5, 2.3)  | F-Pheol <sup>20</sup> -5, F-Pheol <sup>20</sup> -6, F-Pheol <sup>20</sup> -9                           |                                              |                                                    |
|                       | 8                 | 130.7, <i>d</i> , (8.2)   | 7.24, <i>t</i> , (7.6)        | F-Pheol <sup>20</sup> -4, F-Pheol <sup>20</sup> -6                                                     |                                              |                                                    |
|                       | 9                 | 126.3, <i>d</i> , (2.6)   | 7.10, <i>d</i> , (7.6)        | F-Pheol <sup>20</sup> -5, F-Pheol <sup>20</sup> -7                                                     |                                              |                                                    |
|                       |                   | 1-OH                      |                               | 5.27, <i>t</i> , (6.6)                                                                                 |                                              |                                                    |
|                       |                   | NH                        |                               | 7.22, <i>d</i> , overlapped                                                                            | Gln <sup>19</sup> -1                         | F-Pheol <sup>20</sup> -1, F-Pheol <sup>20</sup> -2 |
|                       |                   | F                         |                               | -115.8*, <i>m</i>                                                                                      |                                              |                                                    |

\*Recorded at 470 MHz

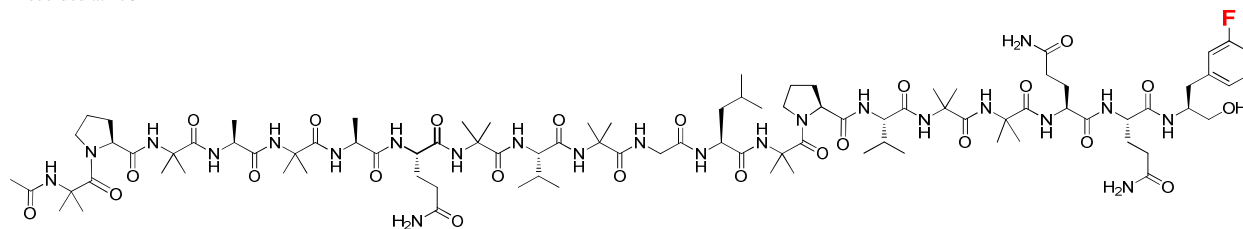

*meta*-F-Pheol alamethicin F50 (3)

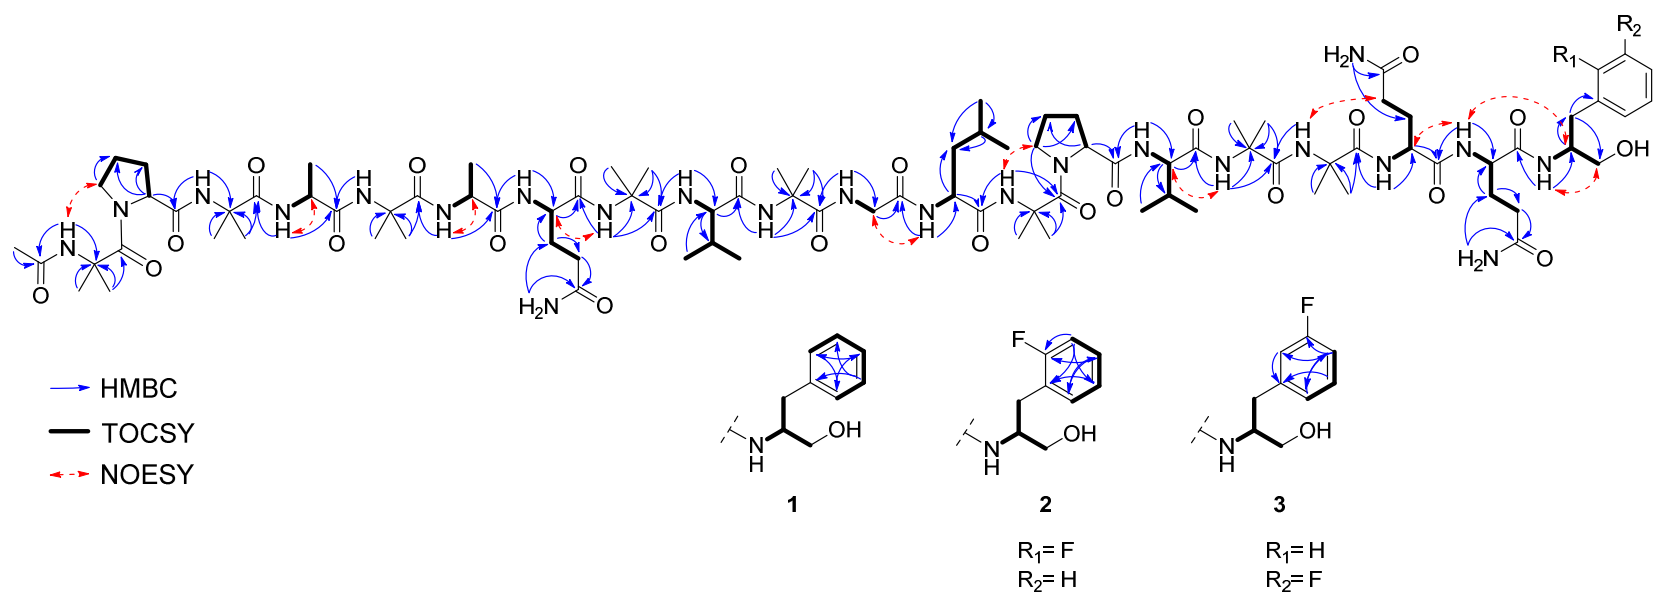

**Figure S12.** Key HMBC, TOCSY and NOESY correlations for compounds 1-3.

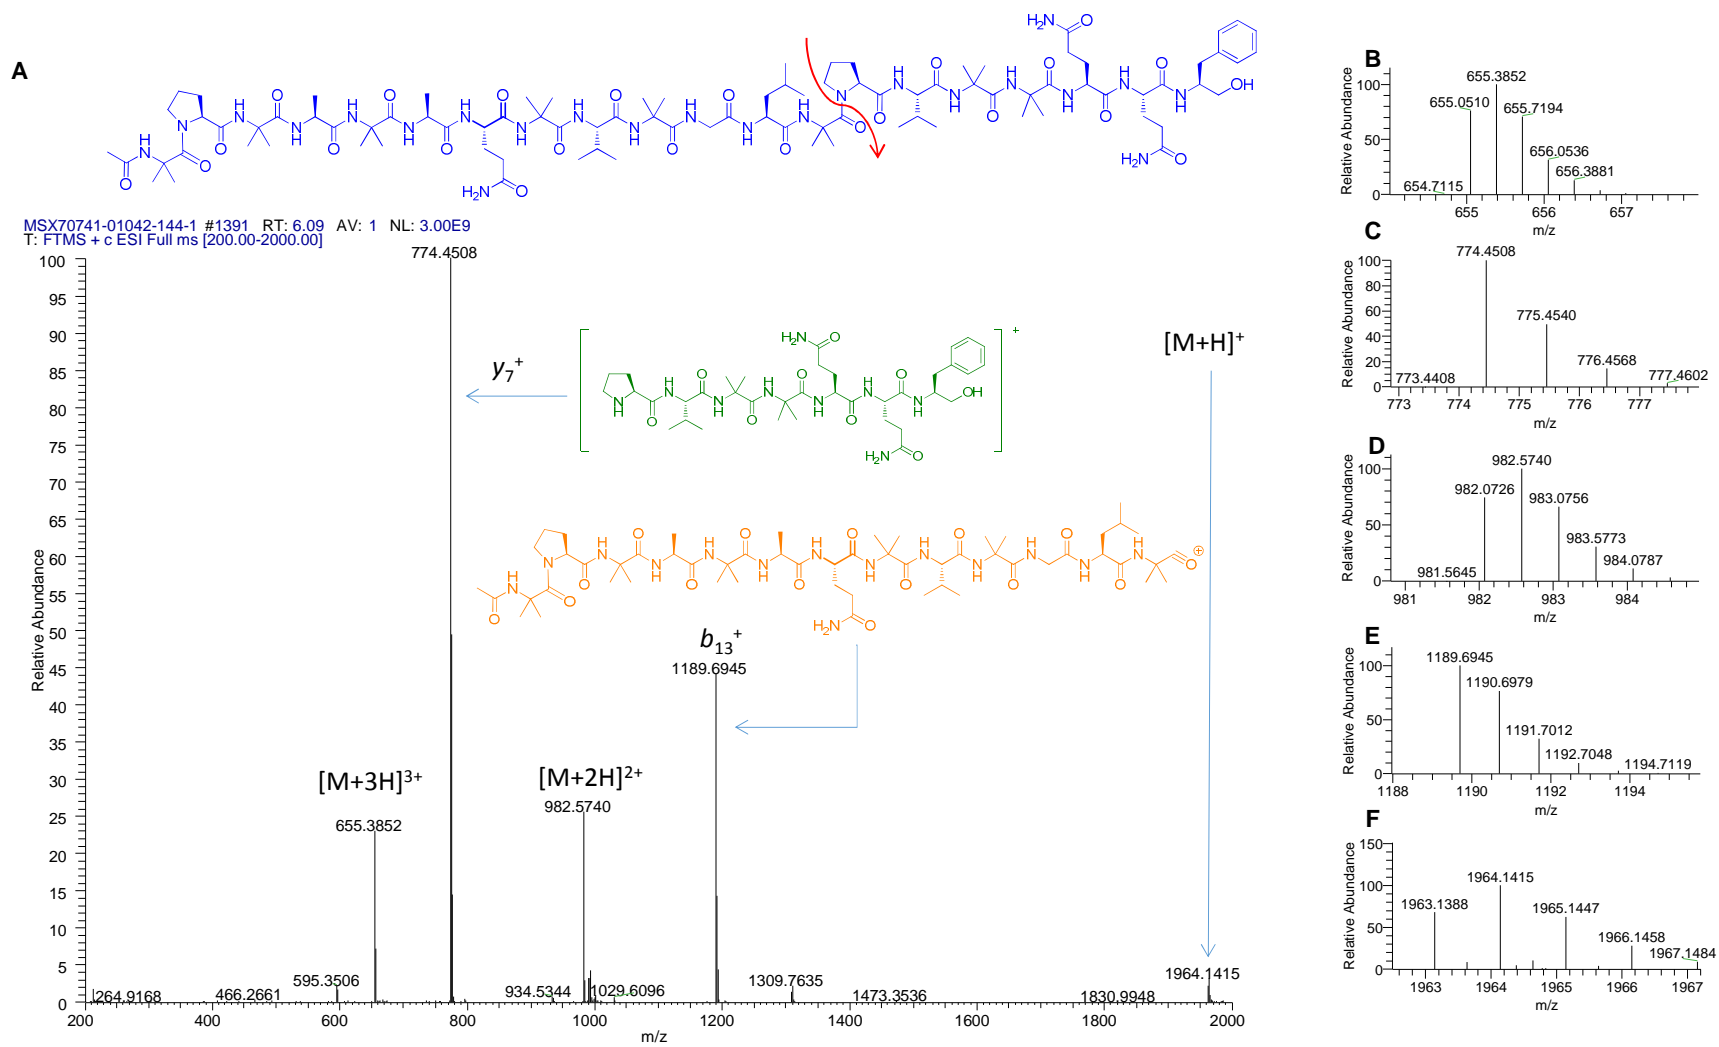

**Figure S13.** A) Full scan positive HRESIMS for compound 1. B-F) Expansion of the  $[M+3H]^{3+}$ ,  $y_7^+$ ,  $[M+2H]^{2+}$ ,  $b_{13}^+$ , and  $[M+H]^+$  ion peaks, respectively.

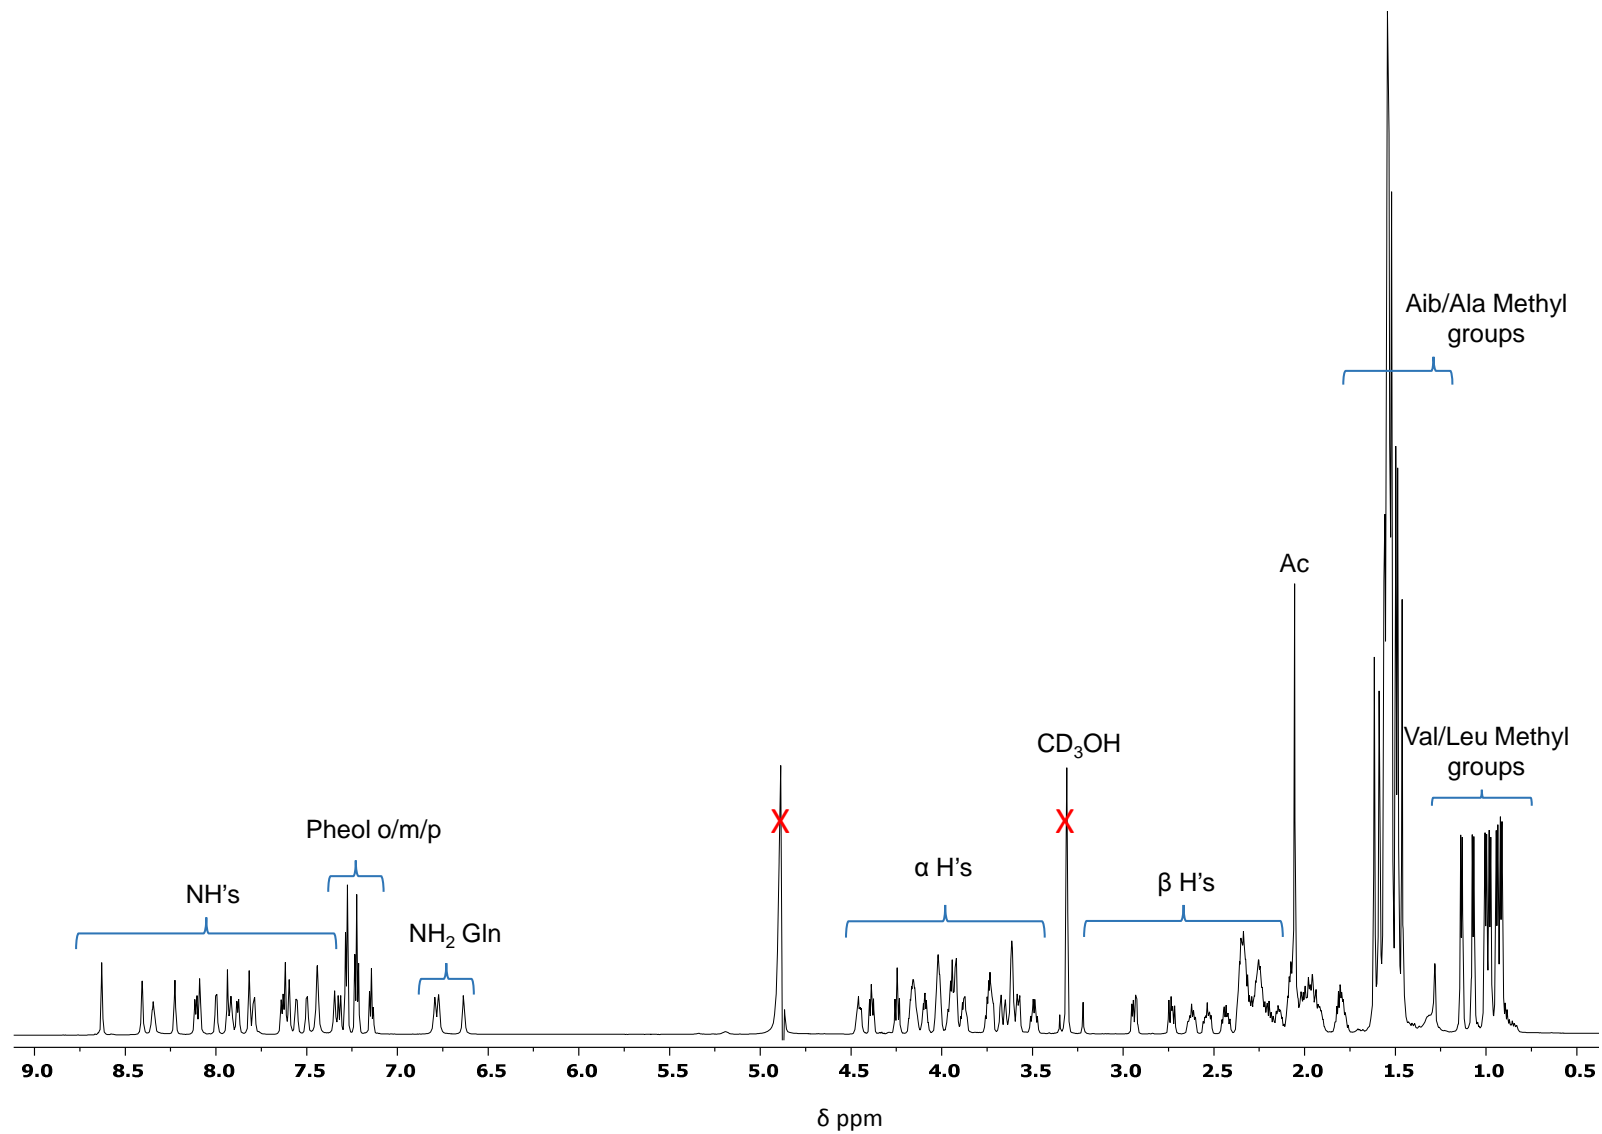

**Figure S14.** <sup>1</sup>H-NMR spectrum of alamethicin F50 (1) in CD<sub>3</sub>OH (recorded at 700 MHz).

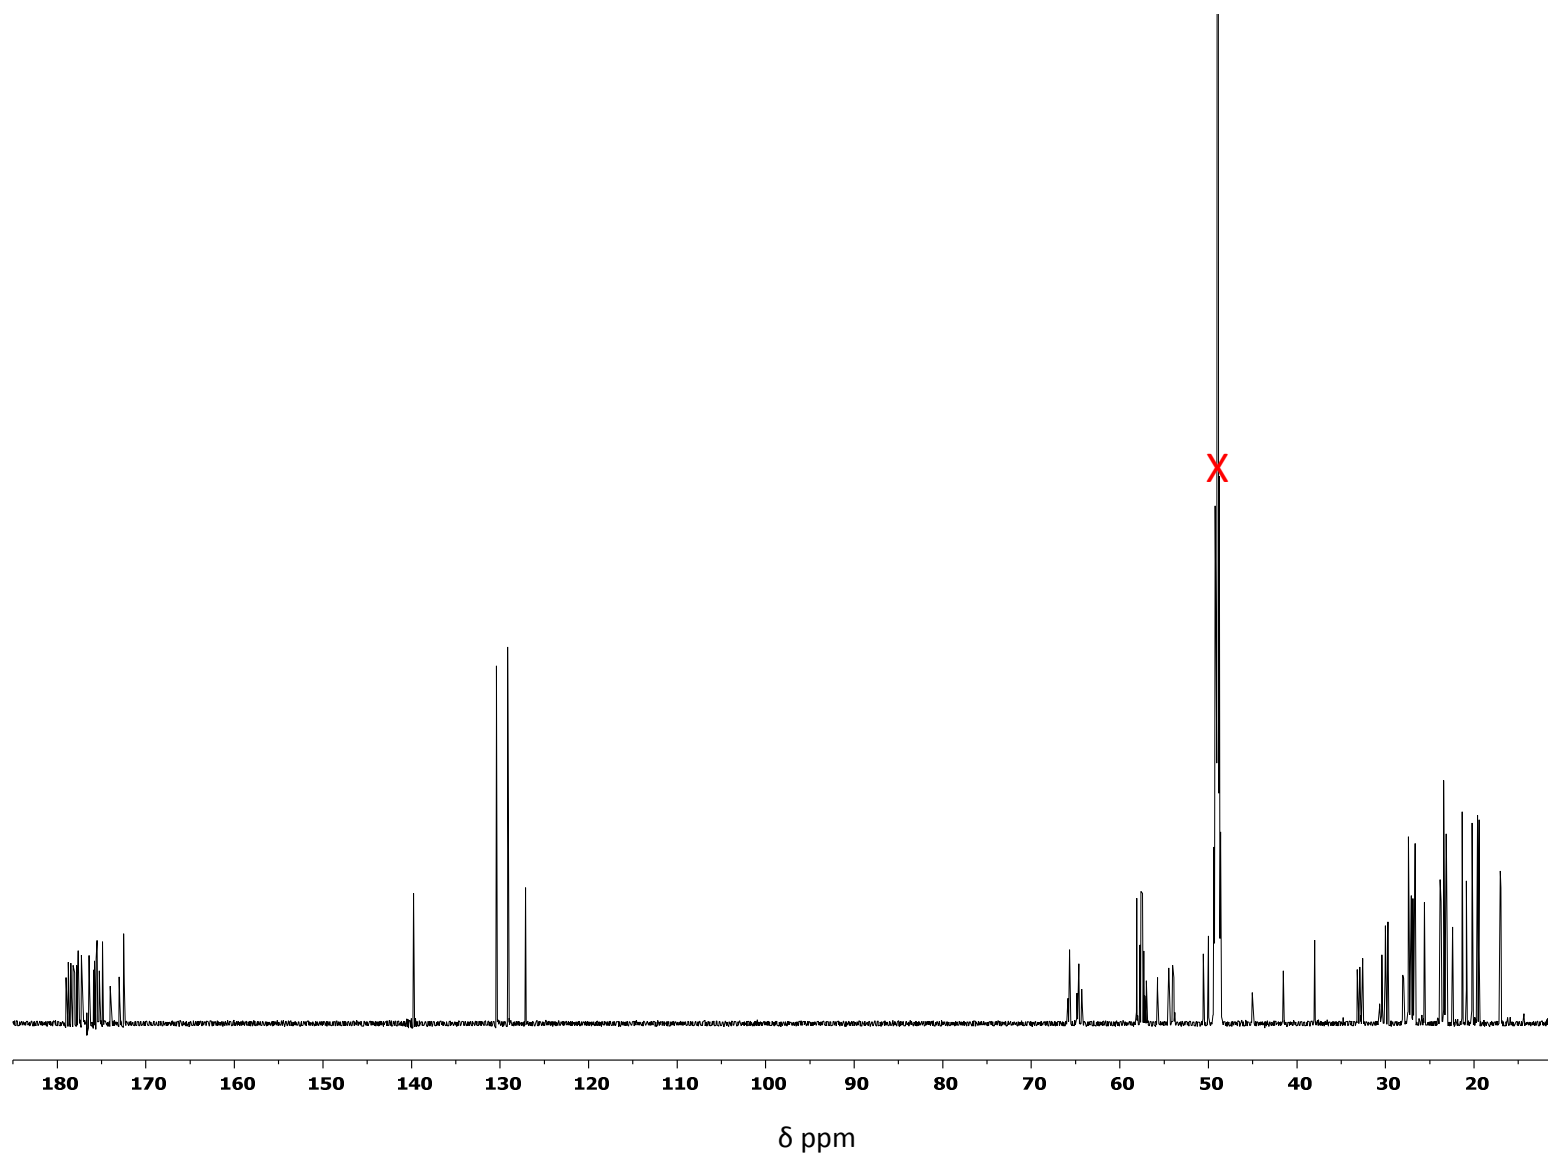

**Figure S15.**  $^{13}\text{C}$ -NMR spectrum of alamethicin F50 (1) in  $\text{CD}_3\text{OH}$  (recorded at 175 MHz).

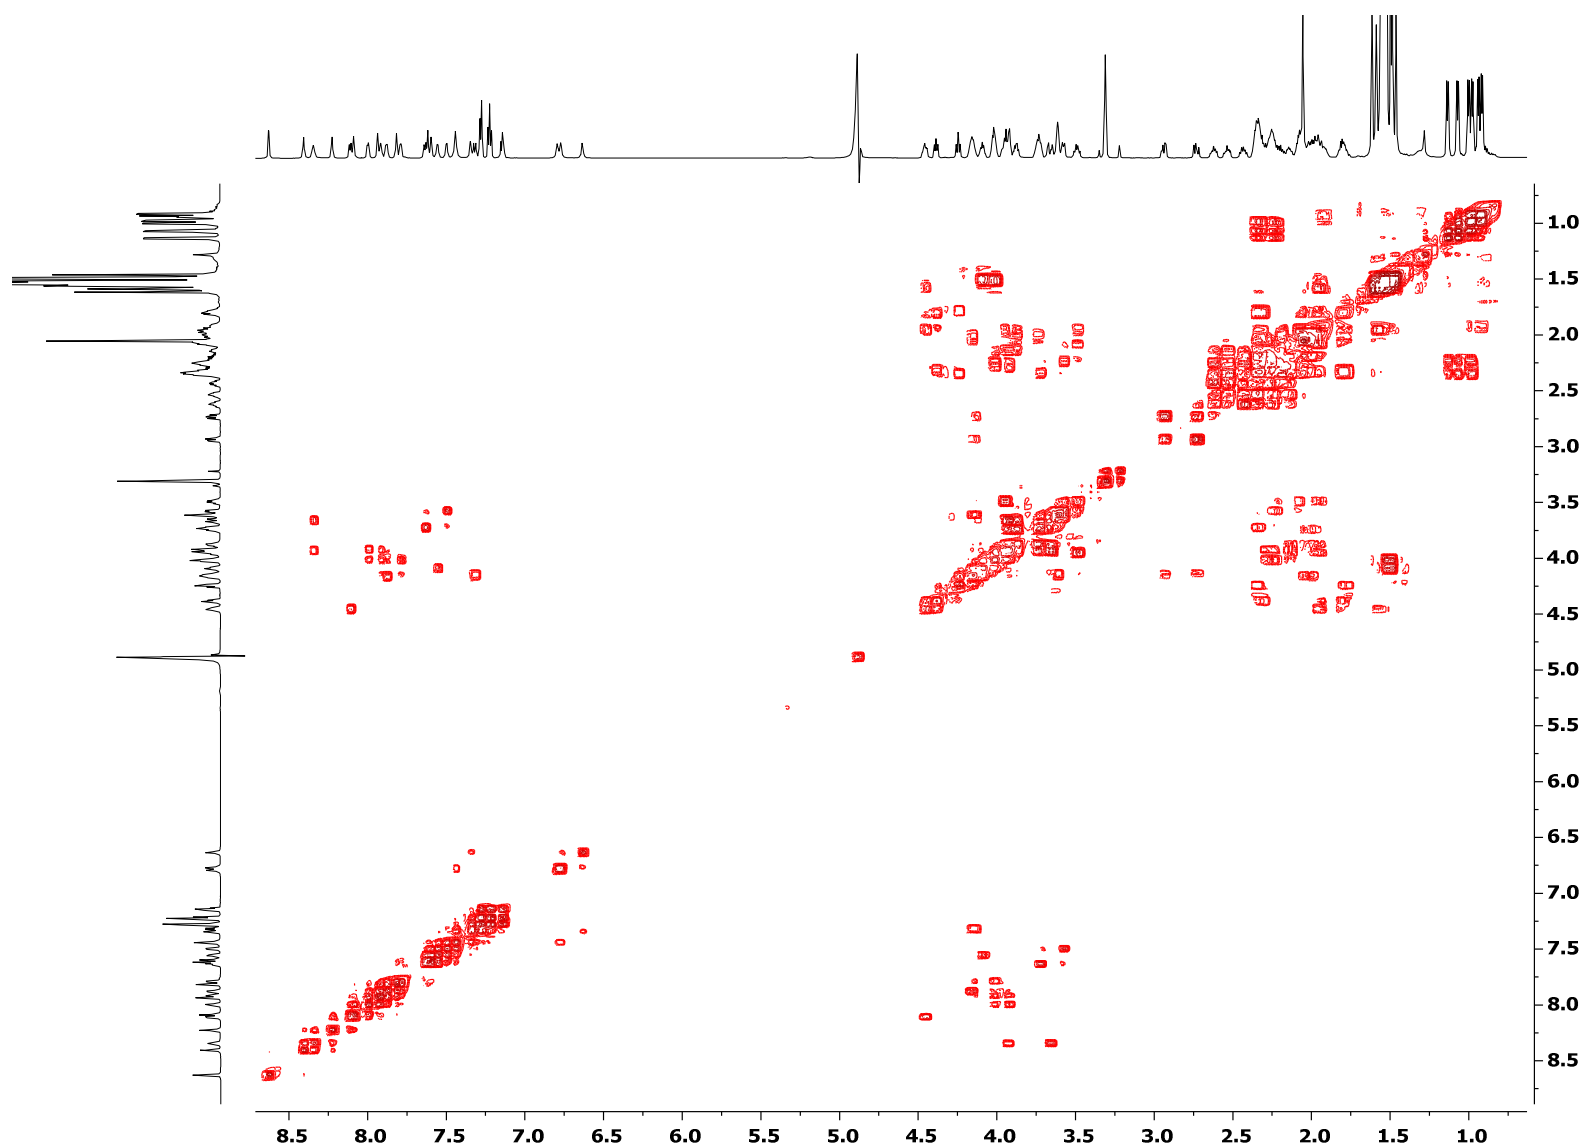

**Figure S16.**  $^1\text{H}$ - $^1\text{H}$  COSY of alamethicin F50 (1) in  $\text{CD}_3\text{OH}$ .

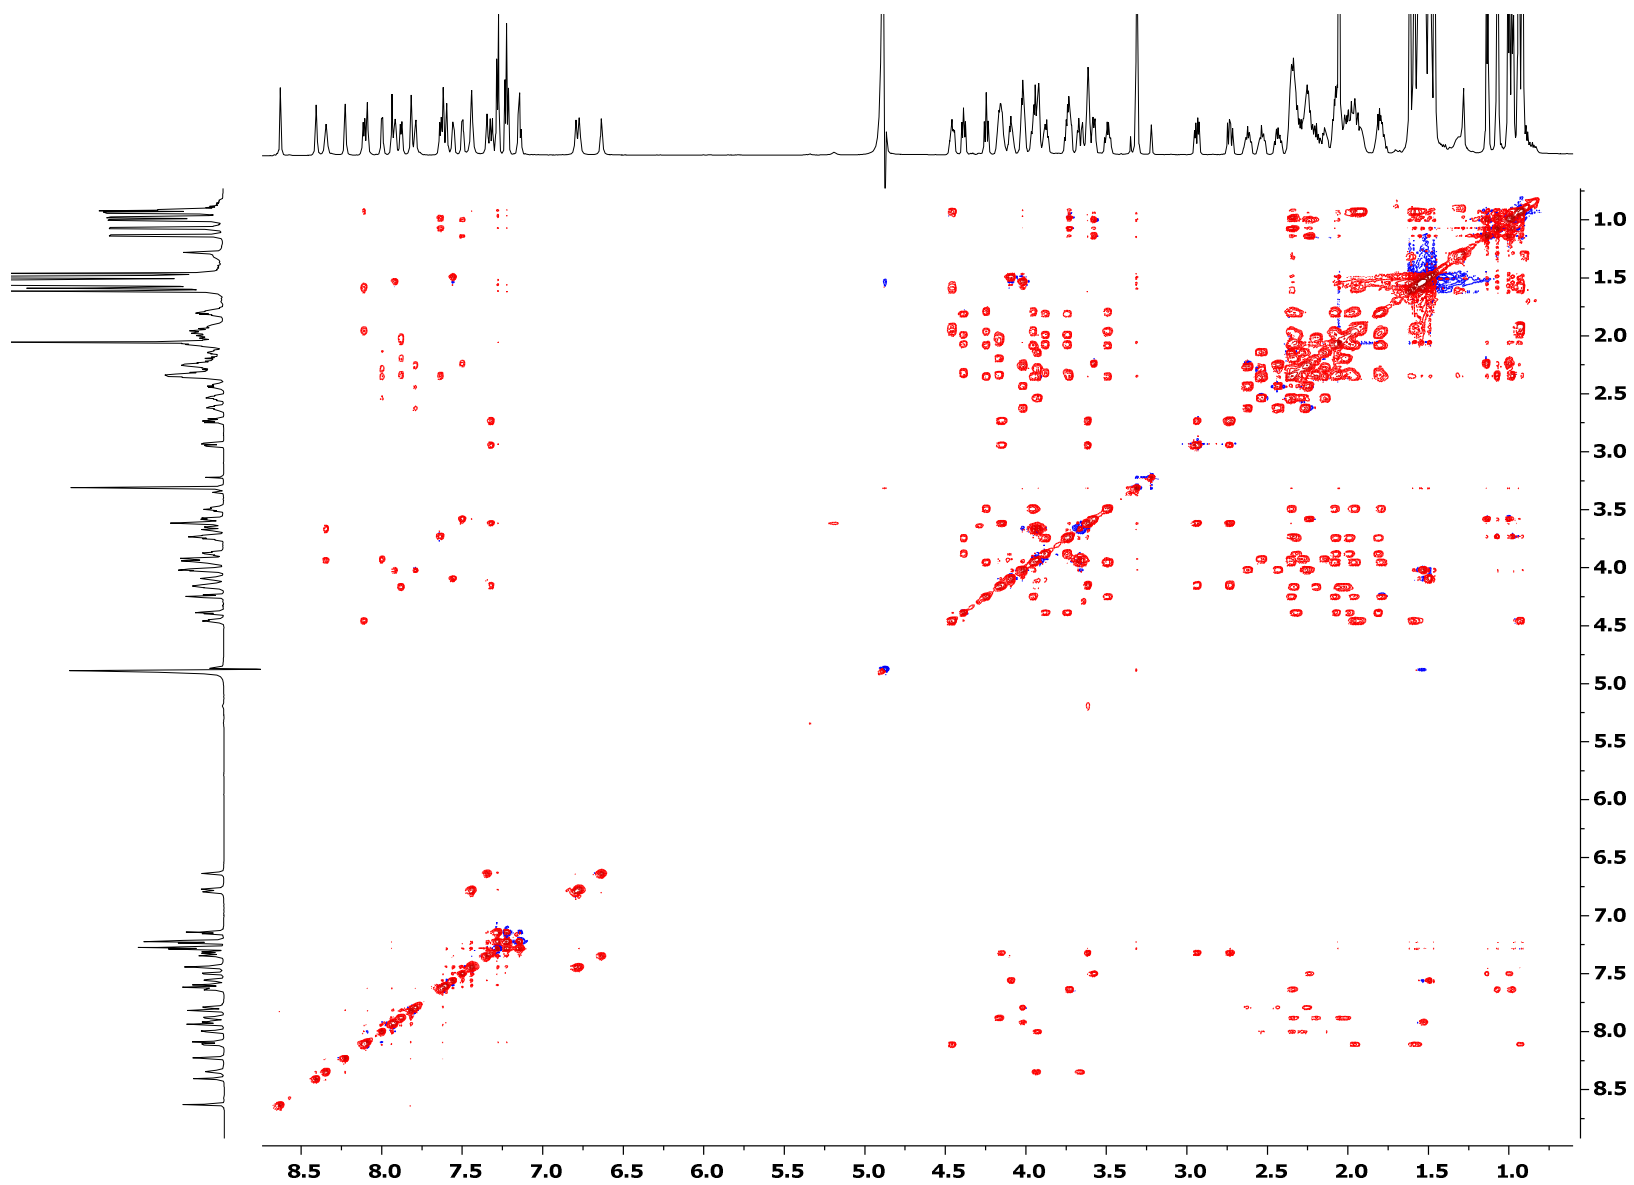

Figure S17.  $^1\text{H}$ - $^1\text{H}$  TOCSY of alamethicin F50 (**1**) in  $\text{CD}_3\text{OH}$ .

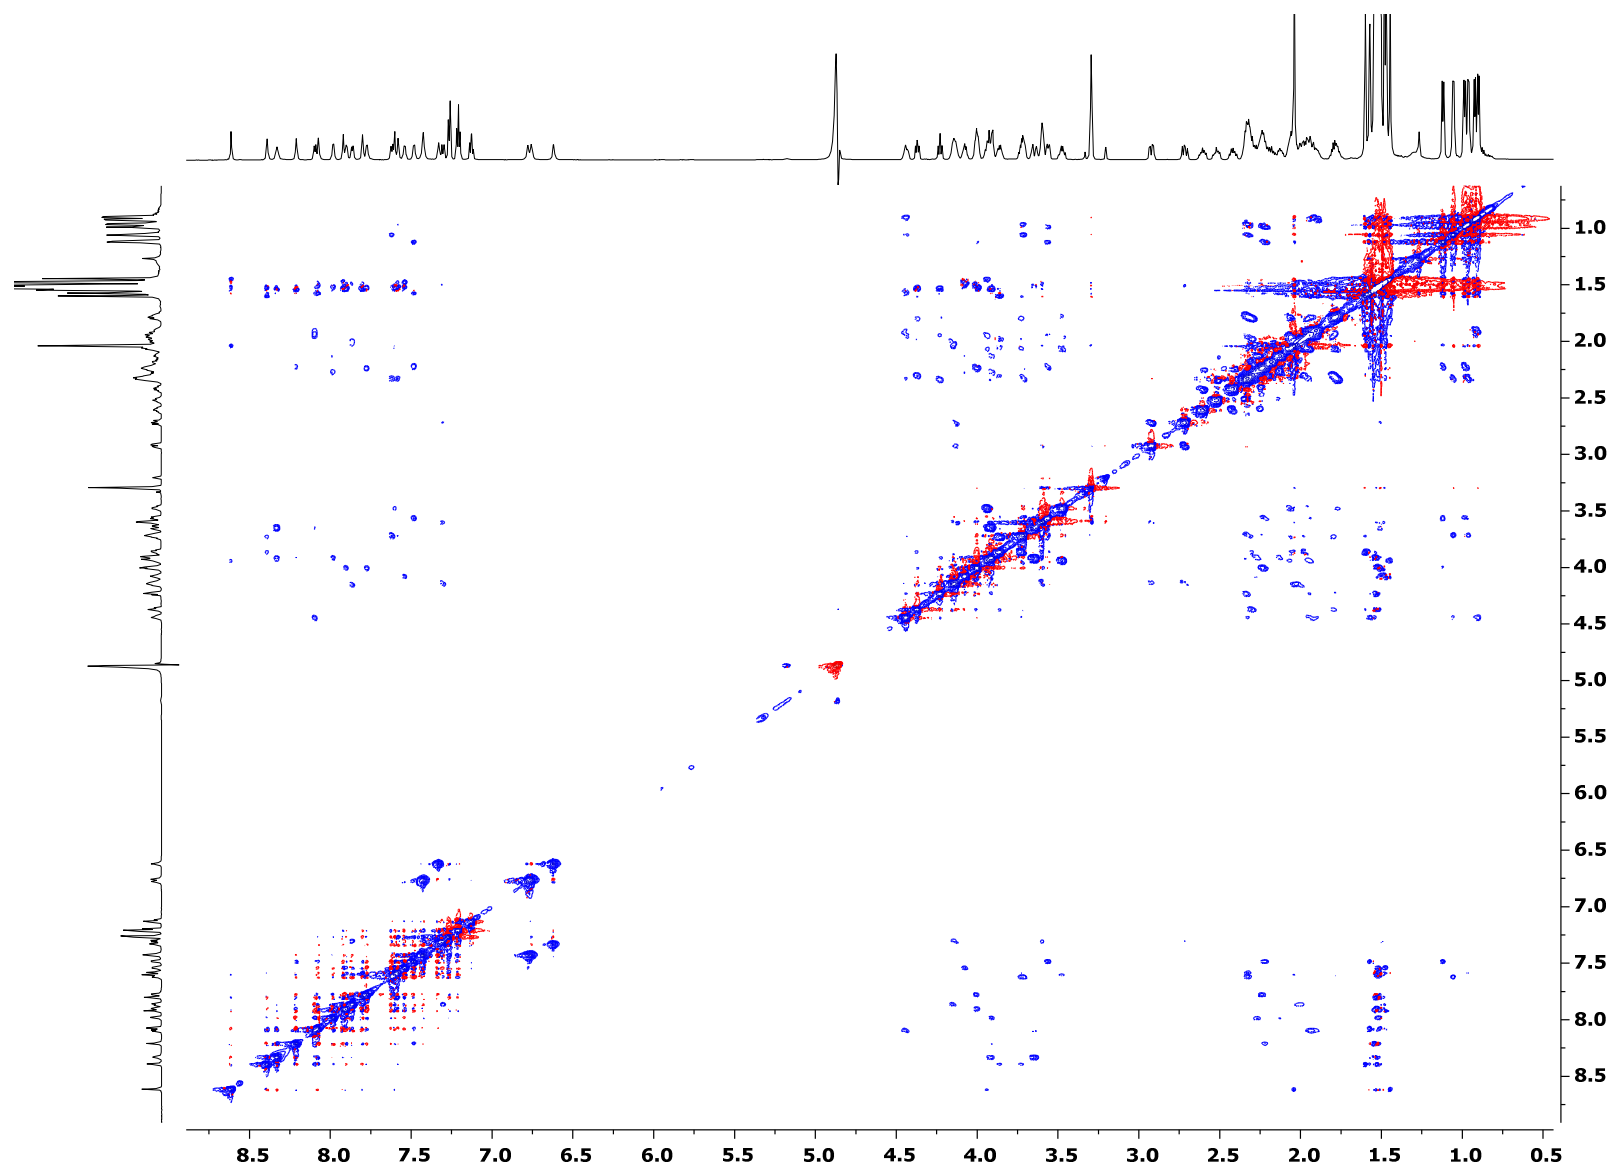

Figure S18.  $^1\text{H}$ - $^1\text{H}$  NOESY of alamethicin F50 (1) in  $\text{CD}_3\text{OH}$ .



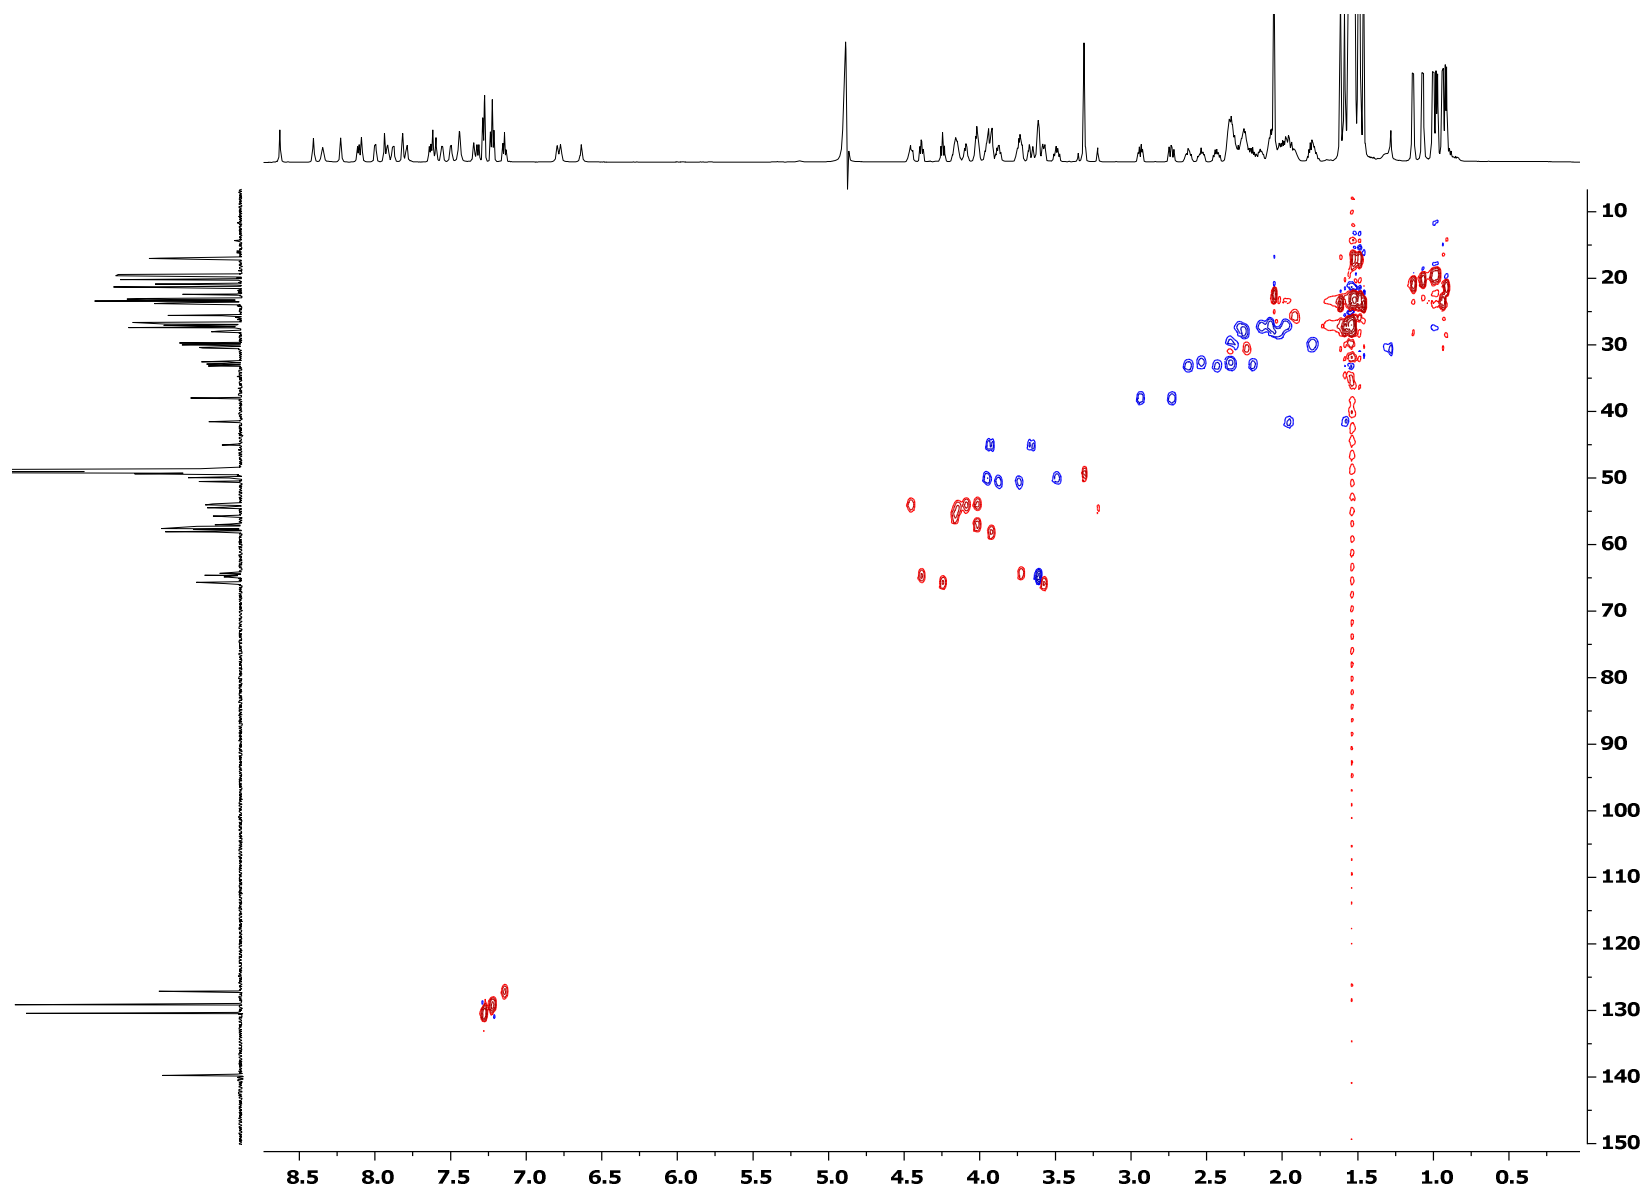

Figure S19.  $^1\text{H}$ - $^{13}\text{C}$  HSQC of alamethicin F50 (1) in  $\text{CD}_3\text{OH}$ .

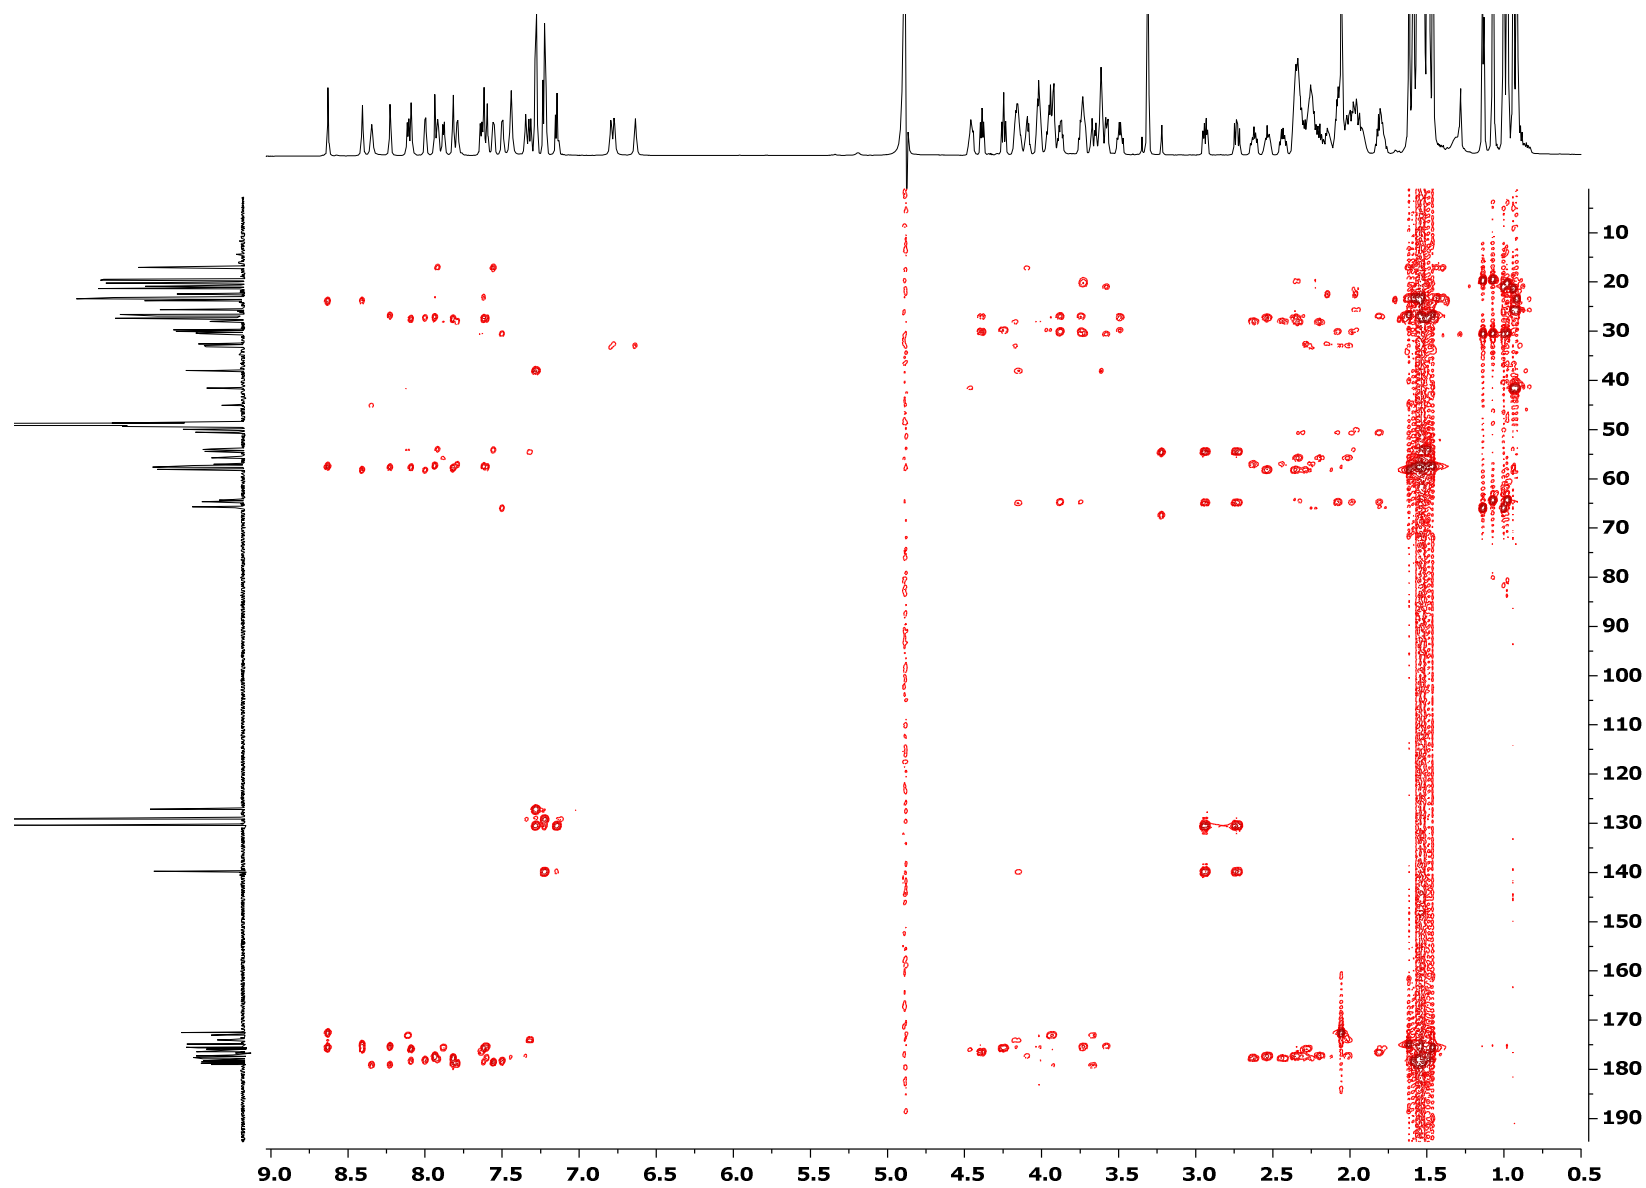

Figure S20.  $^1\text{H}$ - $^{13}\text{C}$  HMBC of alamethicin F50 (1) in  $\text{CD}_3\text{OH}$ .

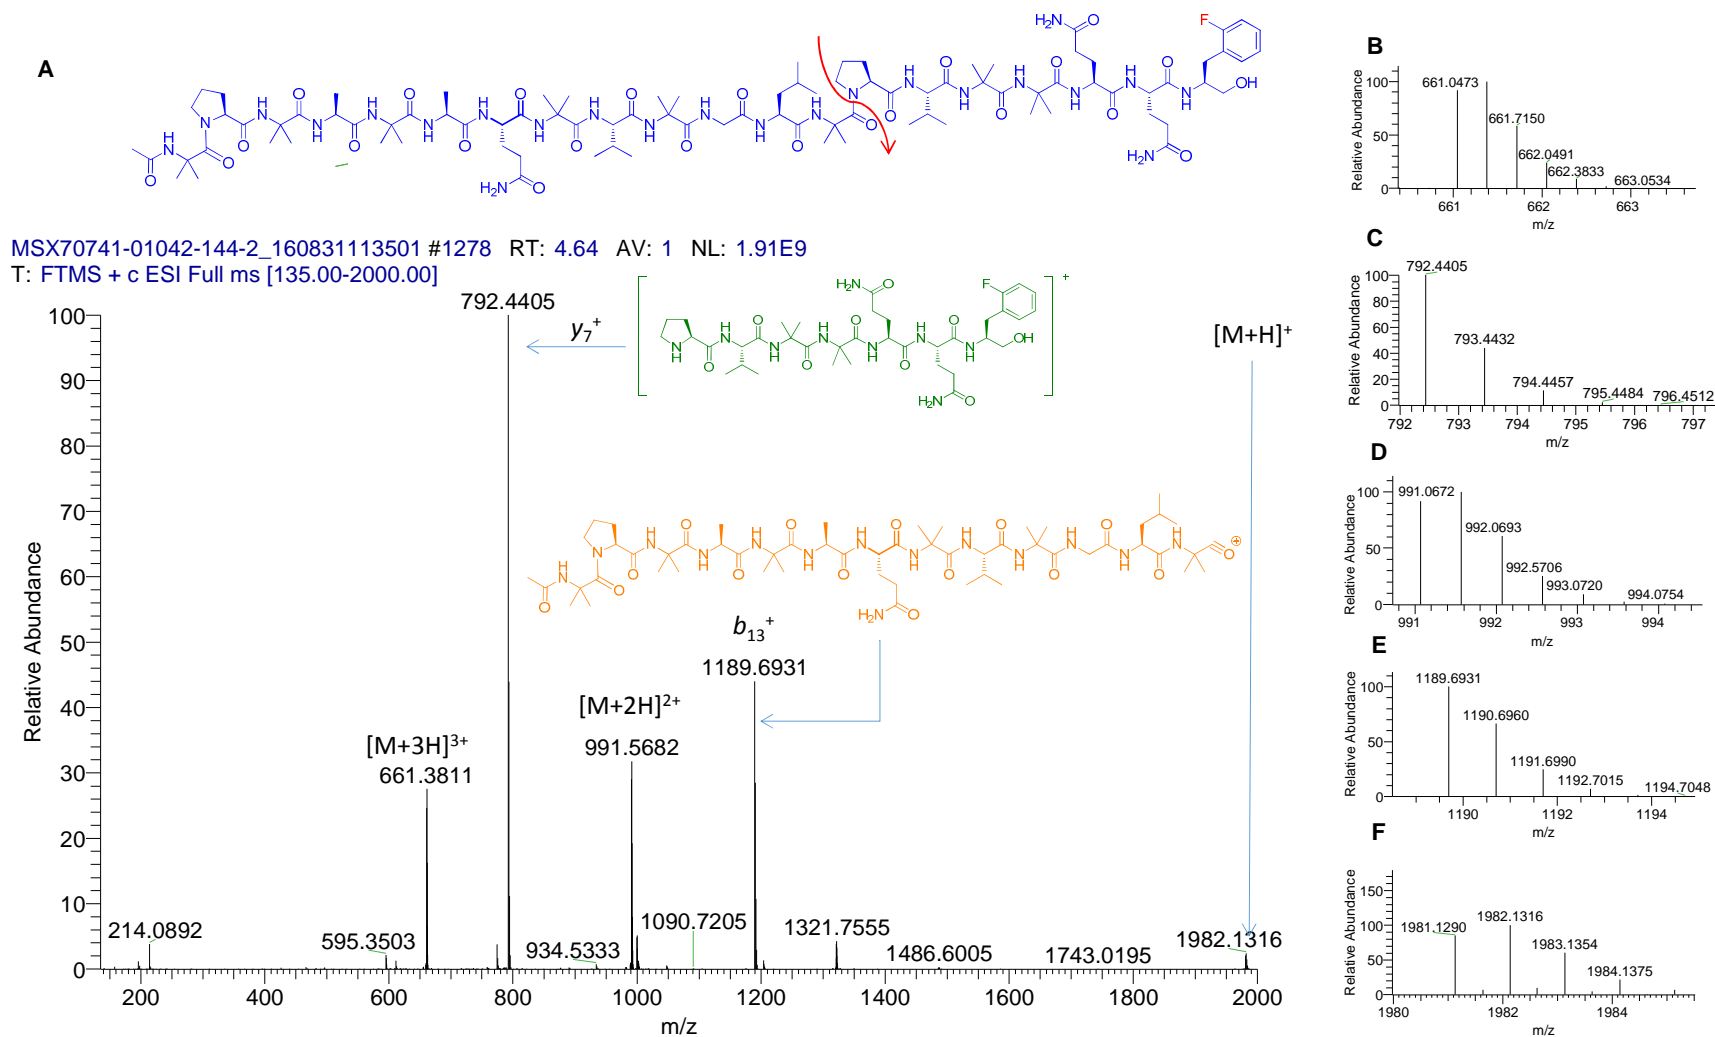

MSX70741-01042-144-2#1320-1545 RT: 4.61-5.36 AV: 7 NL: 2.50E7  
T: Average spectrum MS2 1189.69 (1320-1545)

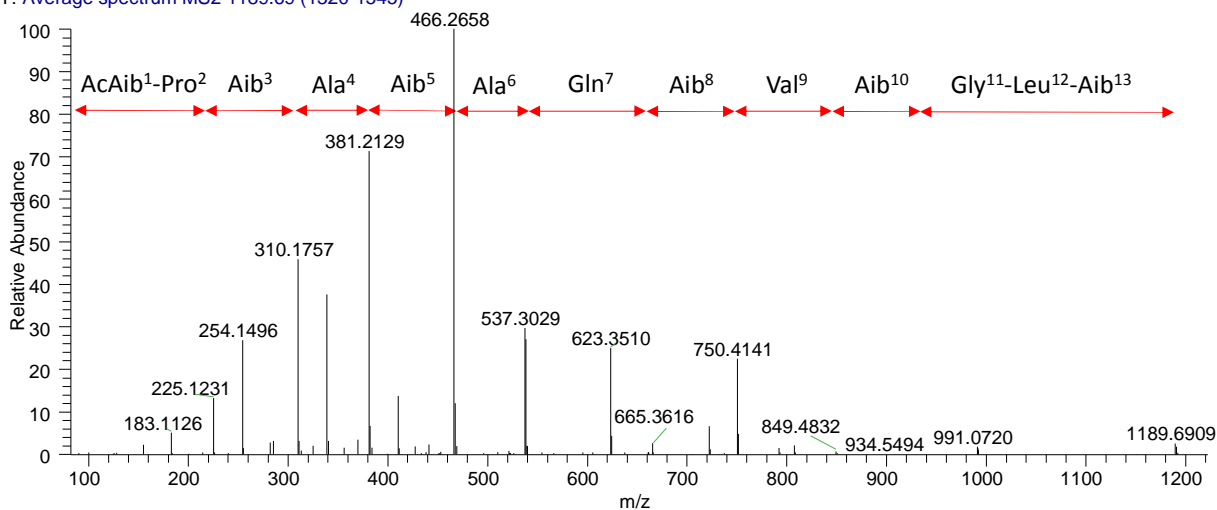

MSX70741-01042-144-2\_16083111350#1272-1393 RT: 4.62-5.03 AV: 6 NL: 3.32E7  
T: FTMS + c ESI d Full ms2 991.07@hcd41.67 [136.00-2040.00]

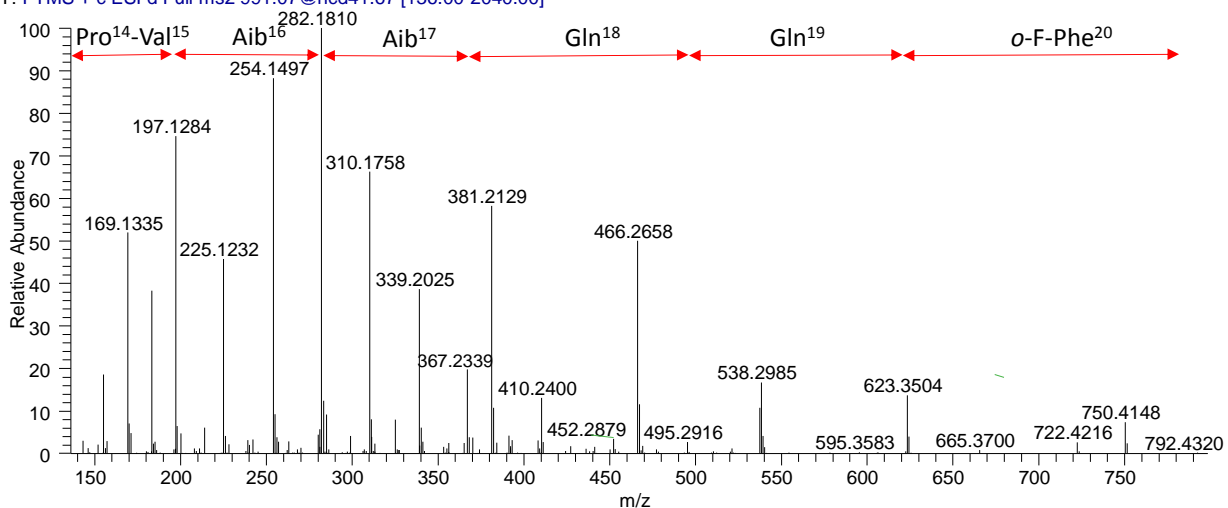

**Figure S22.** The sequential losses of amino acids for each in-source fragment at  $m/z$  1189.69 (top) and  $m/z$  792.43 generated from the  $[M+2H]^{2+}$  ion (bottom) for compound **2**.

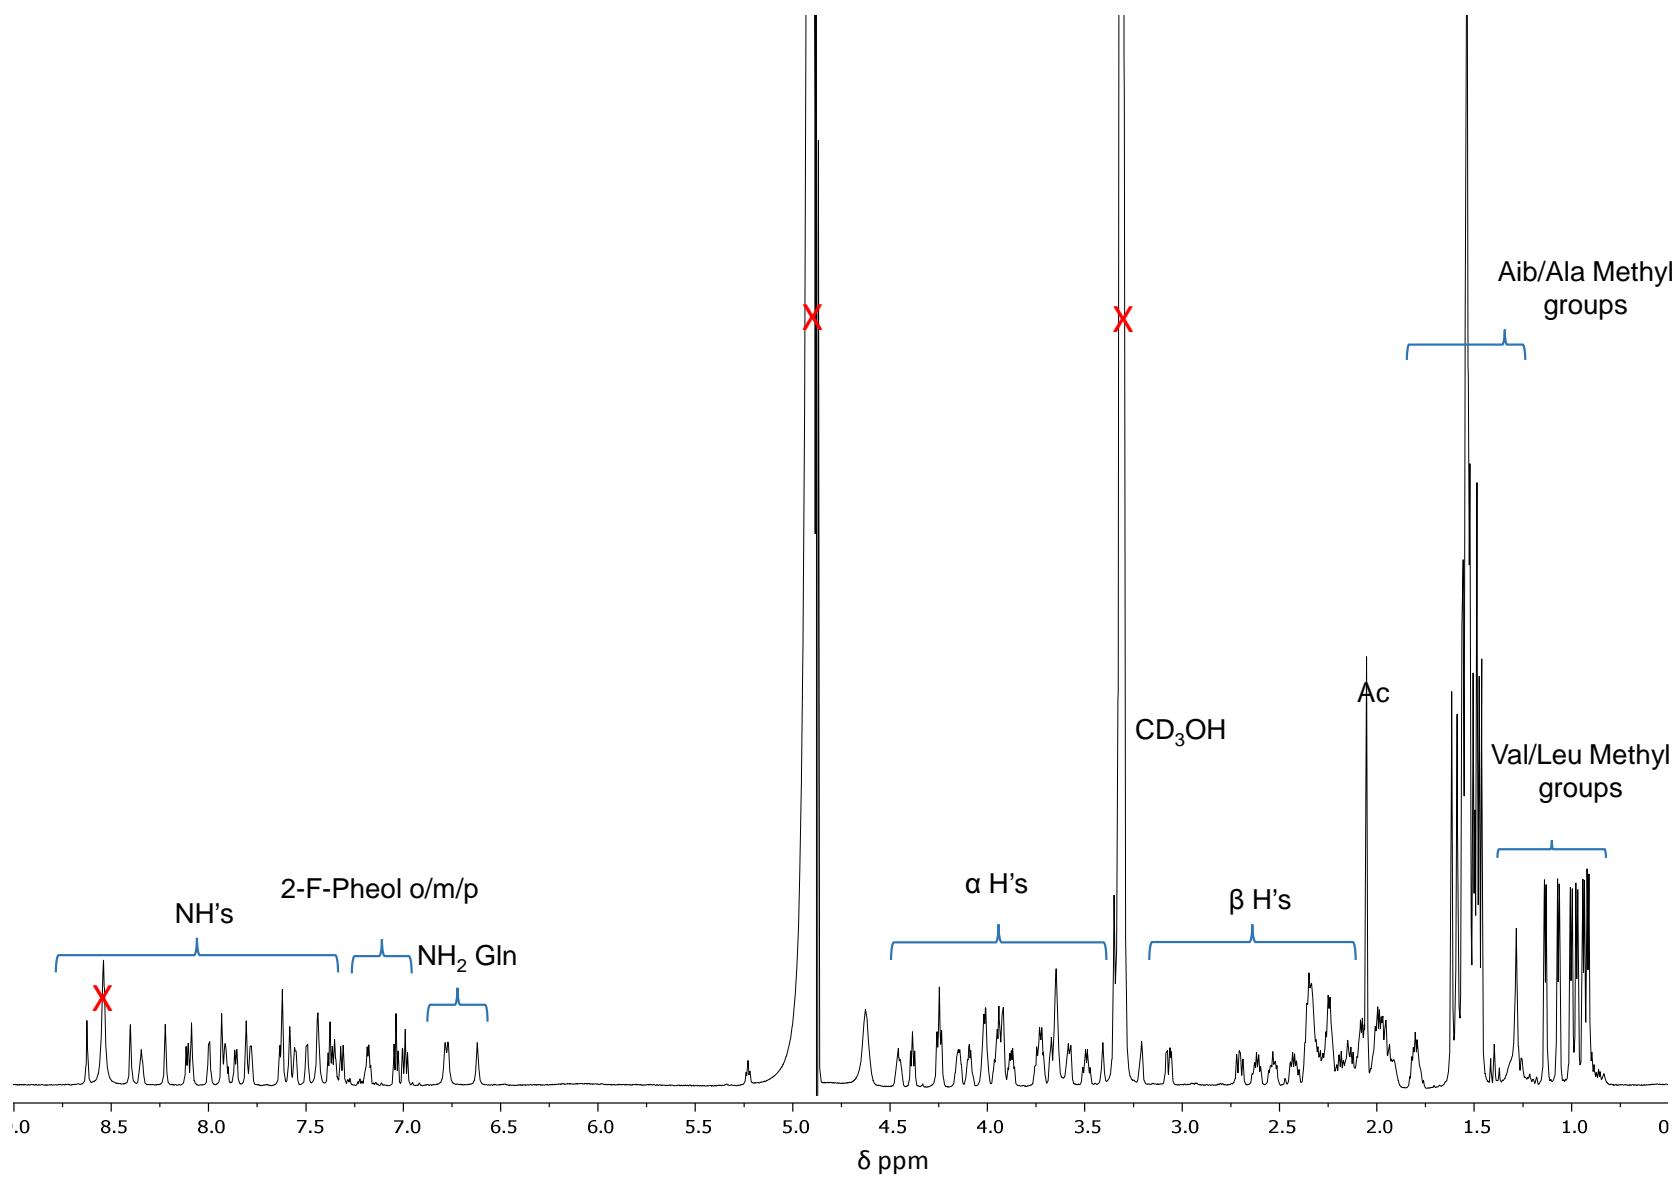

**Figure S23.**  $^1\text{H-NMR}$  spectrum of *ortho*-F-Pheol alamethicin F50 (**2**) in  $\text{CD}_3\text{OH}$  (recorded at 700 MHz).

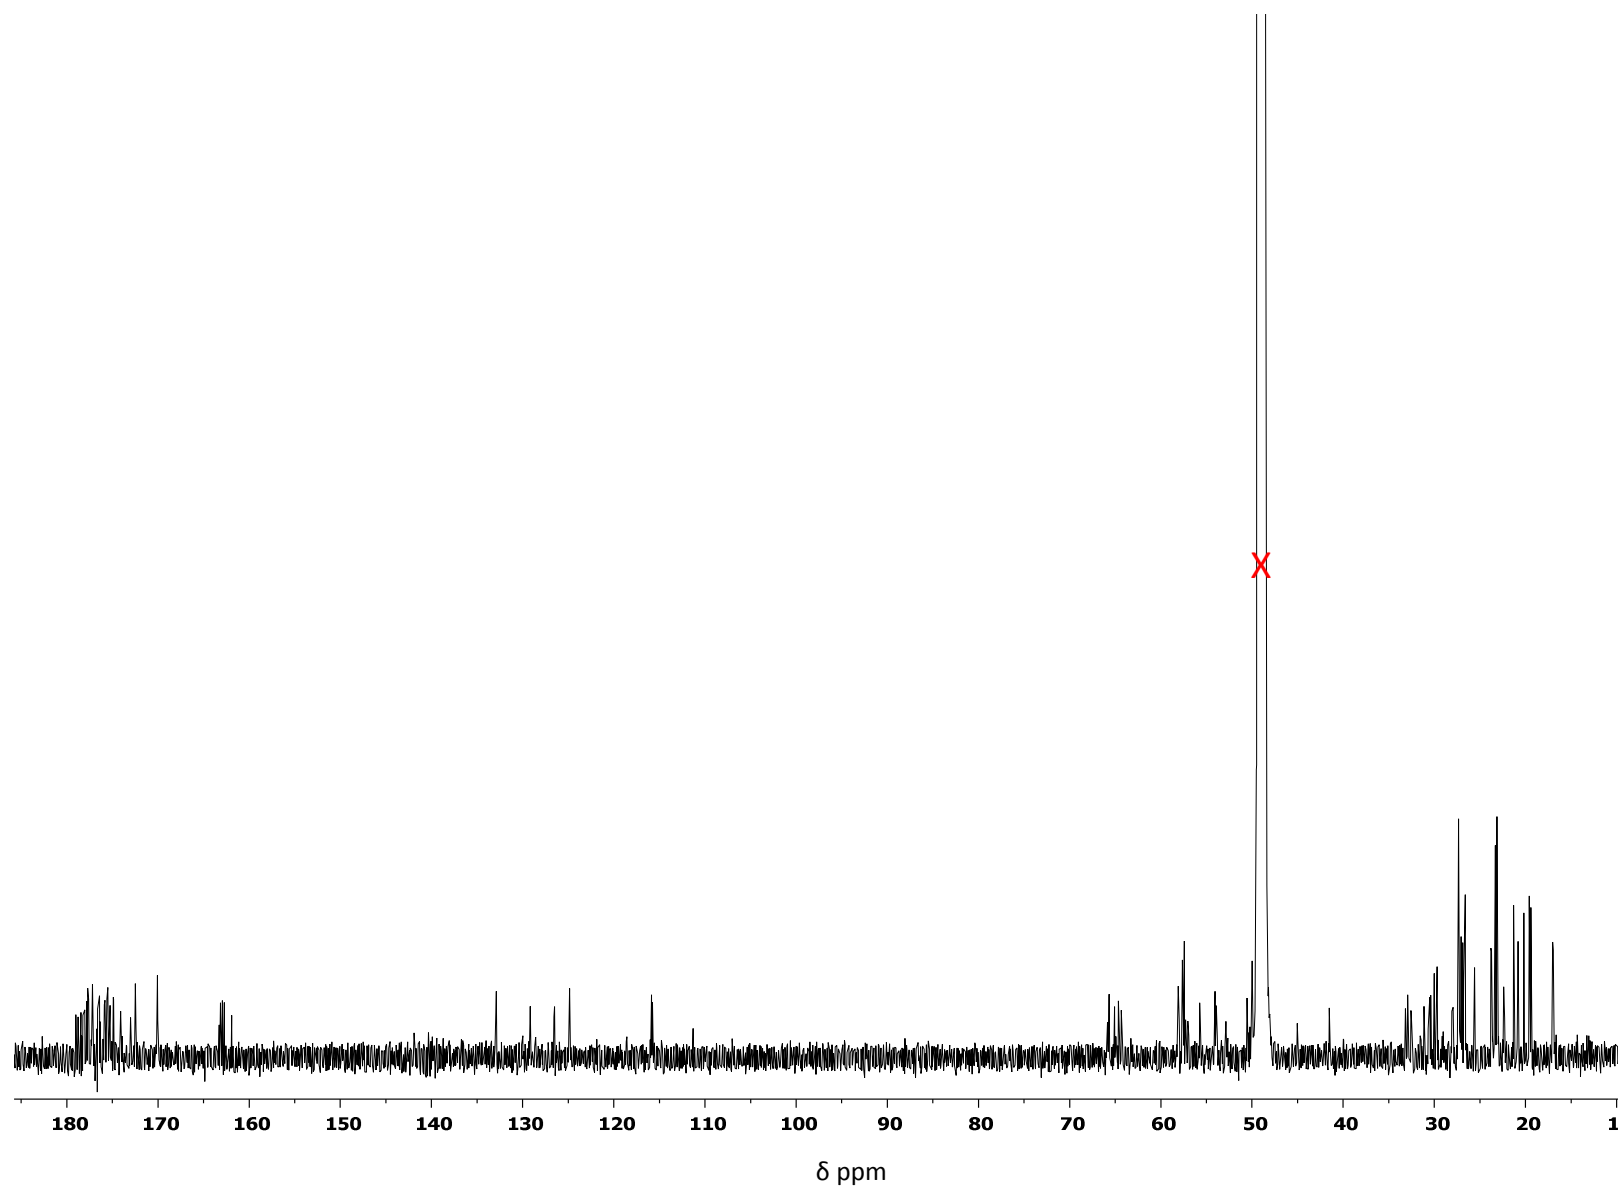

**Figure S24.**  $^{13}\text{C}$ -NMR spectrum of *ortho*-F-Pheol alamethicin F50 (**2**) in  $\text{CD}_3\text{OH}$  (recorded at 175 MHz).

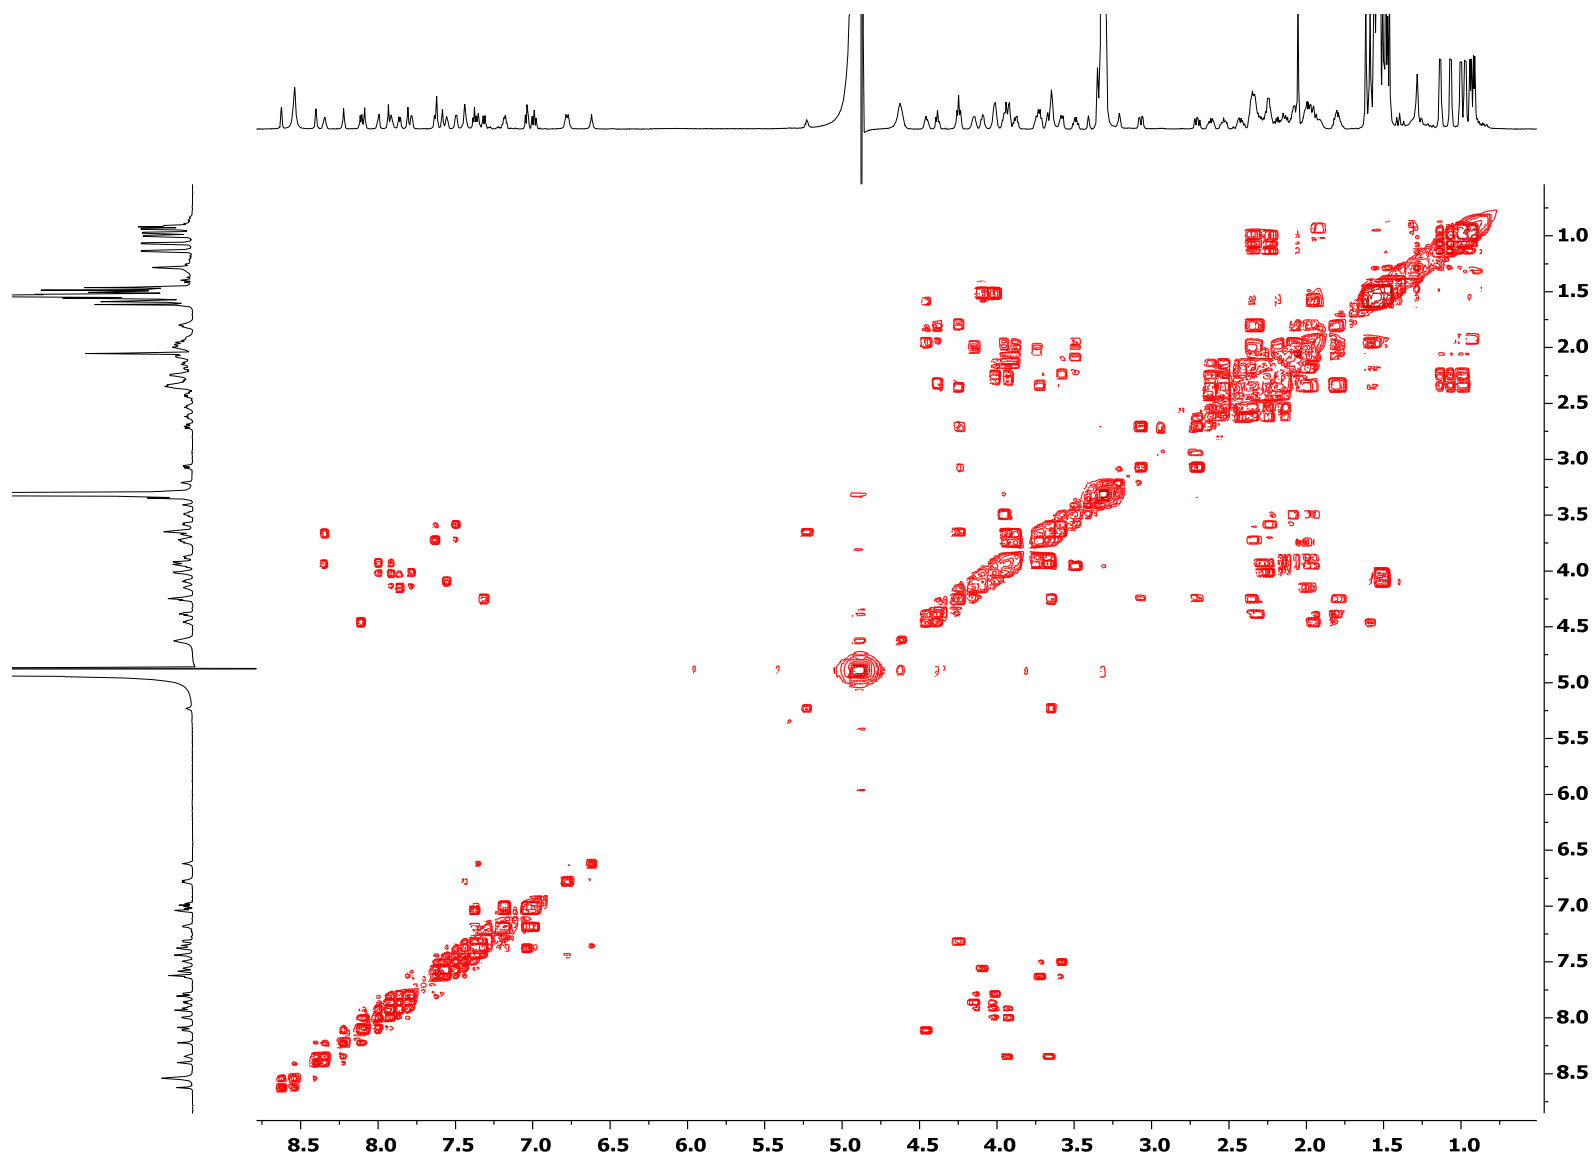

Figure S25.  $^1\text{H}$ - $^1\text{H}$  COSY of *ortho*-F-Pheol alamethicin F50 (**2**) in  $\text{CD}_3\text{OH}$ .

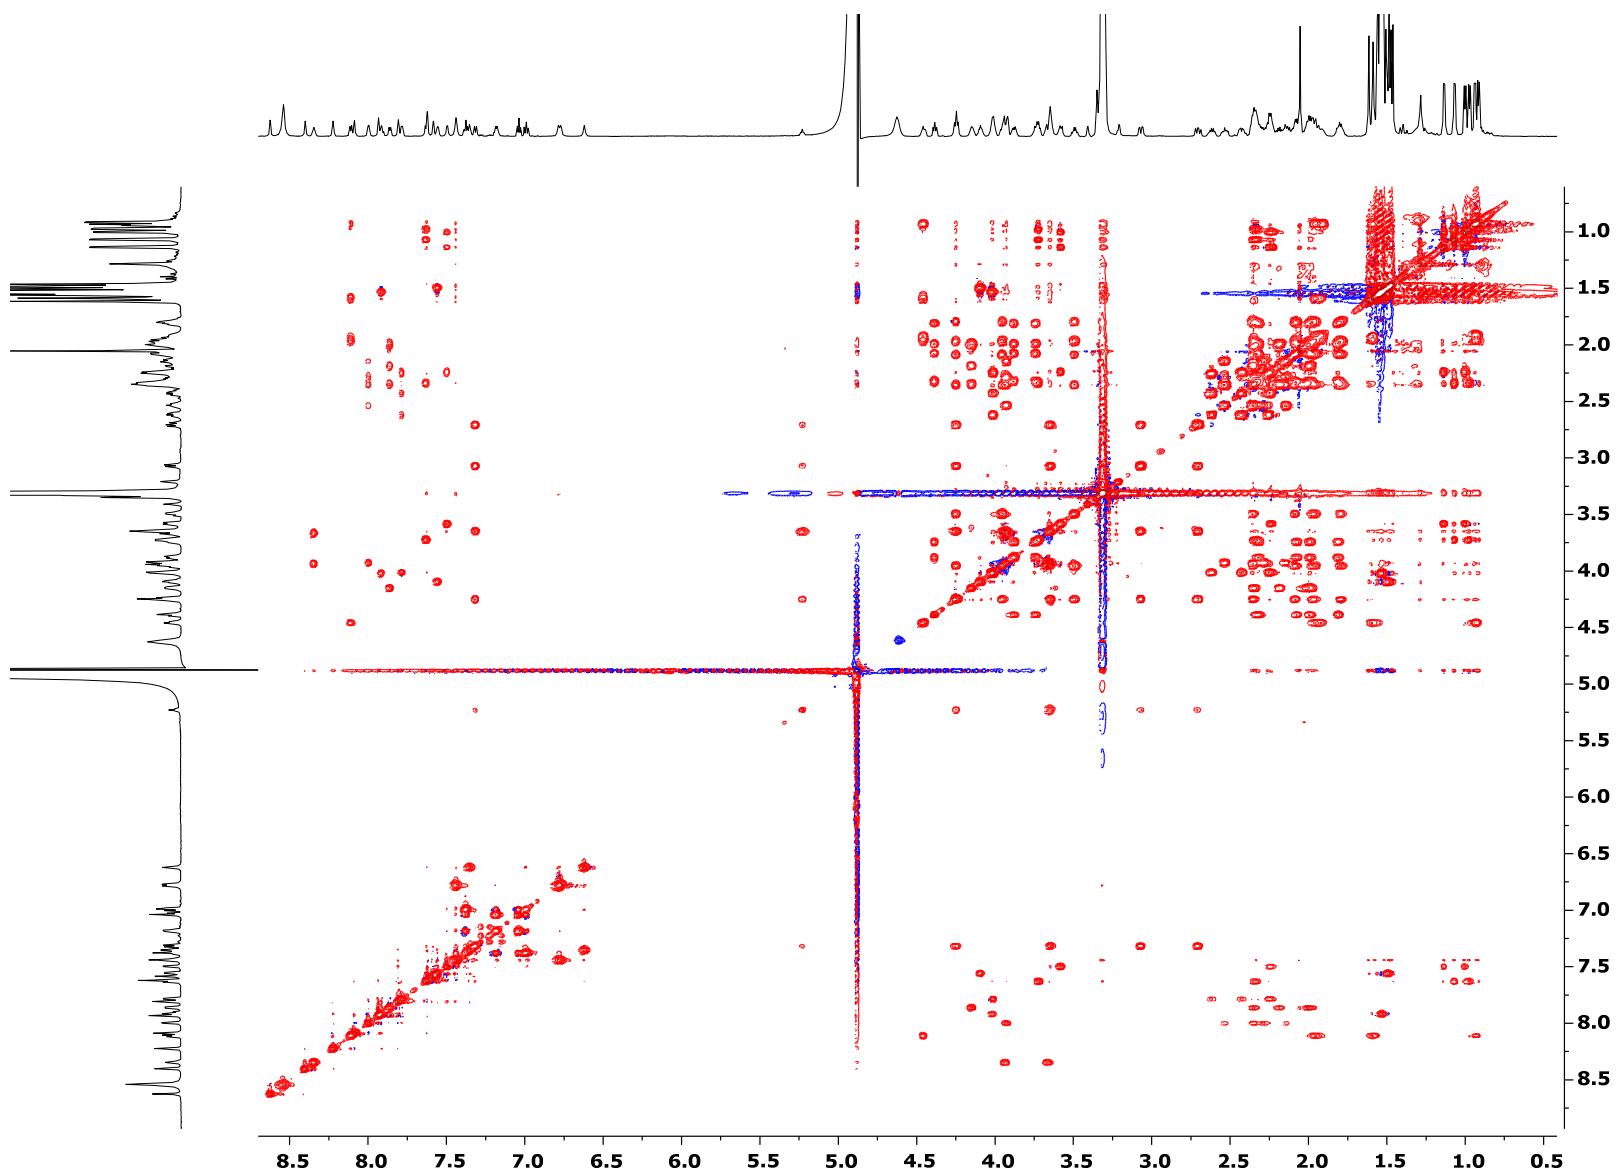

Figure S26.  $^1\text{H}$ - $^1\text{H}$  TOCSY of *ortho*-F-Pheol alamethicin F50 (**2**) in  $\text{CD}_3\text{OH}$ .



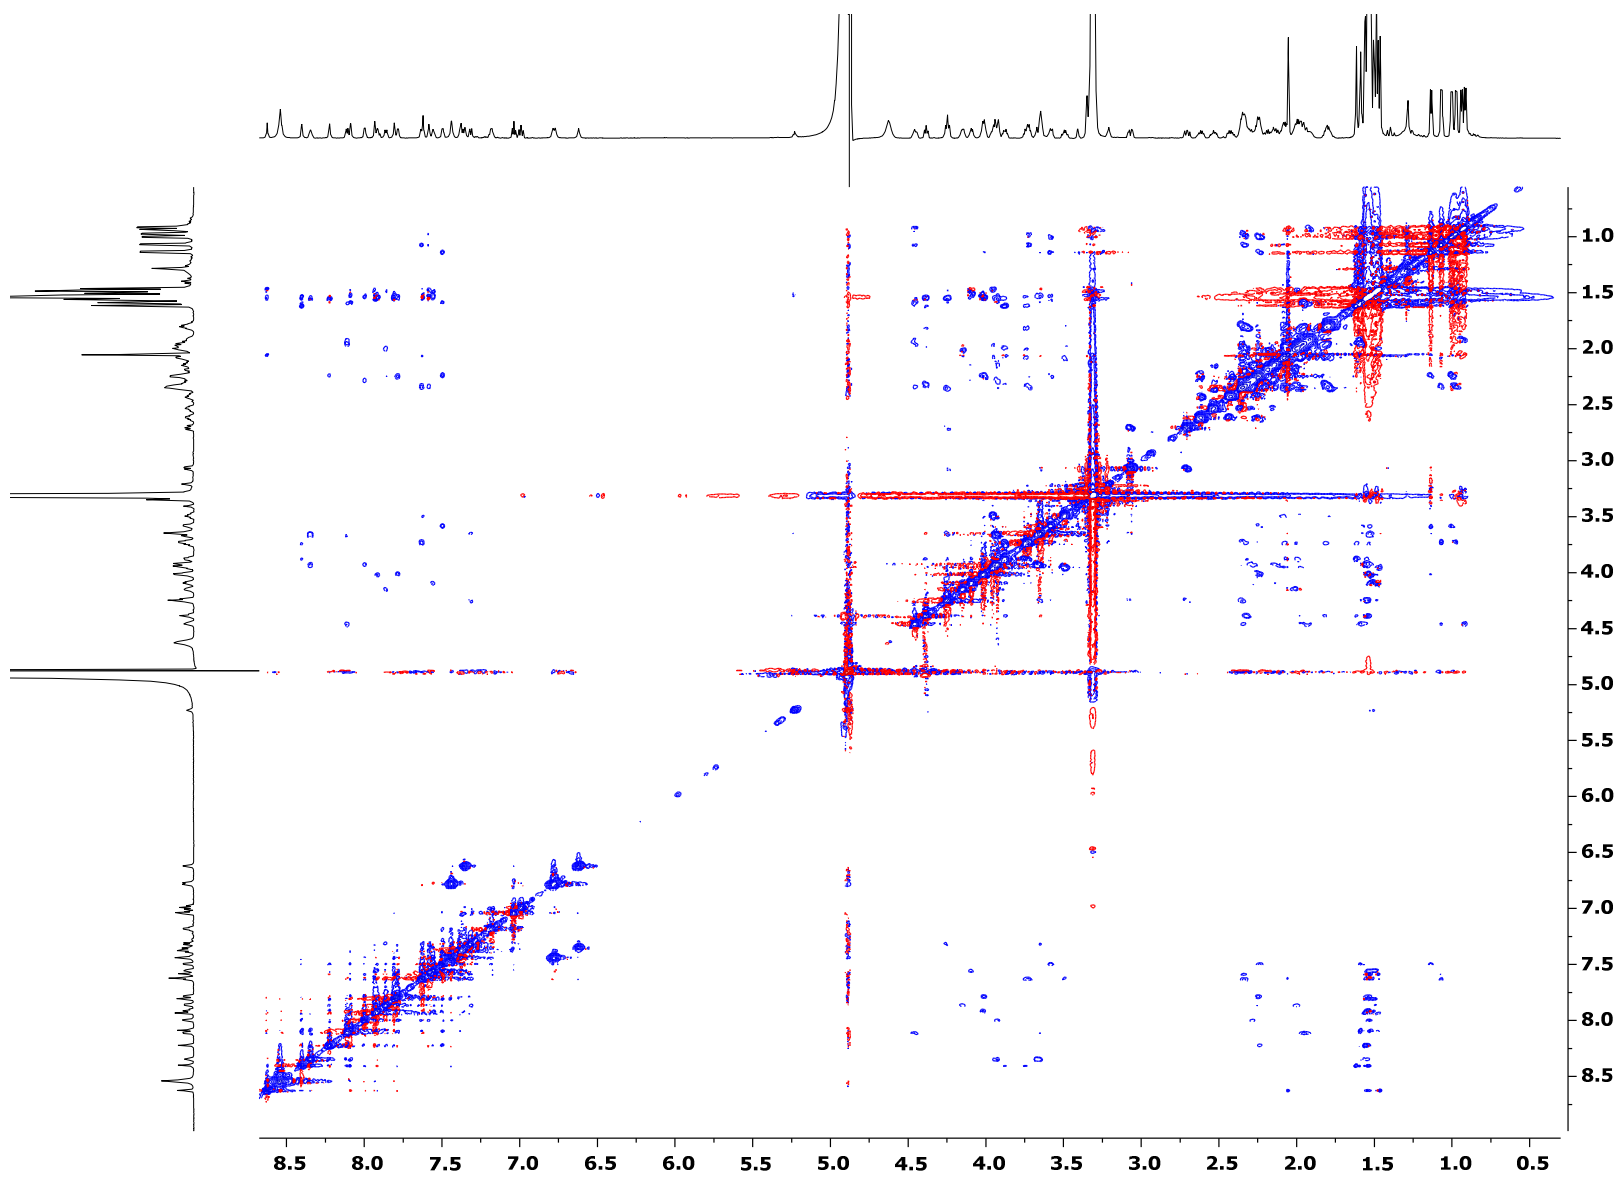

Figure S27.  $^1\text{H}$ - $^1\text{H}$  NOESY of *ortho*-F-Pheol alamethicin F50 (2) in  $\text{CD}_3\text{OH}$ .

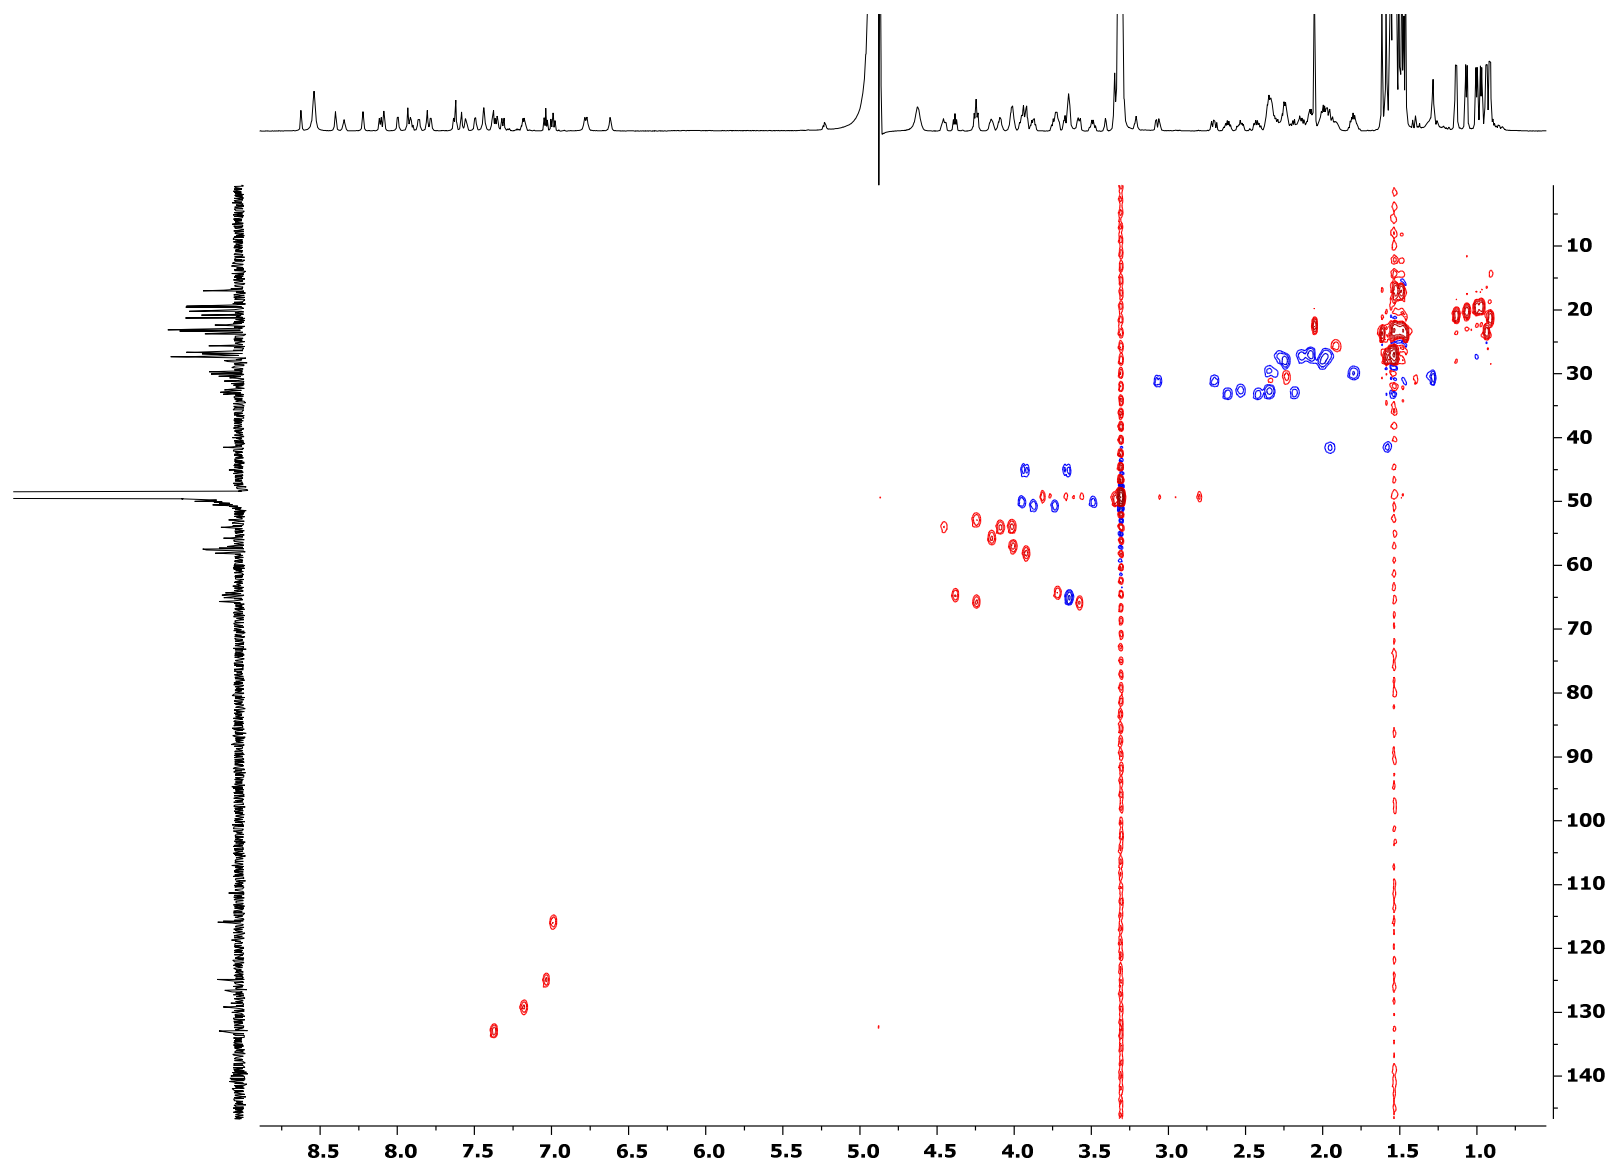

Figure S28.  $^1\text{H}$ - $^{13}\text{C}$  HSQC of *ortho*-F-Pheol alamethicin F50 (**2**) in  $\text{CD}_3\text{OH}$ .

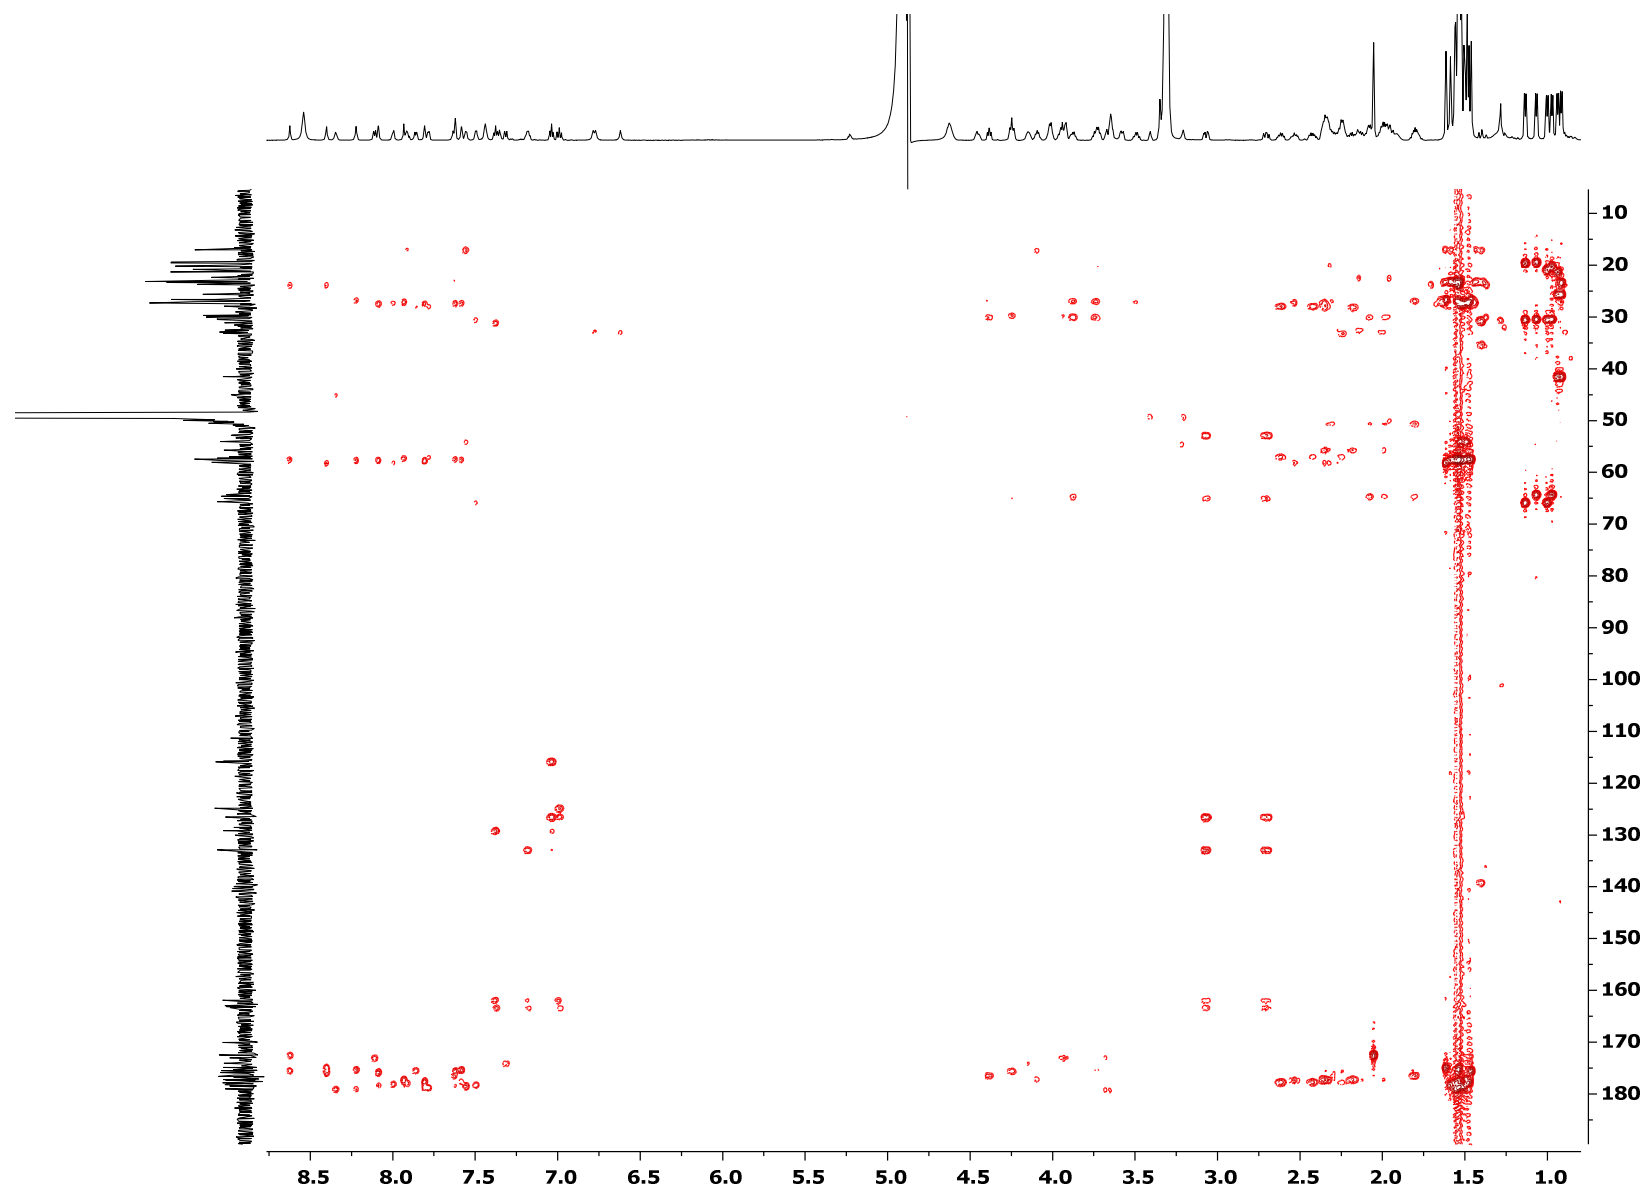

Figure S29.  $^1\text{H}$ - $^{13}\text{C}$  HMBC of *ortho*-F-Pheol alamethicin F50 (**2**) in  $\text{CD}_3\text{OH}$ .

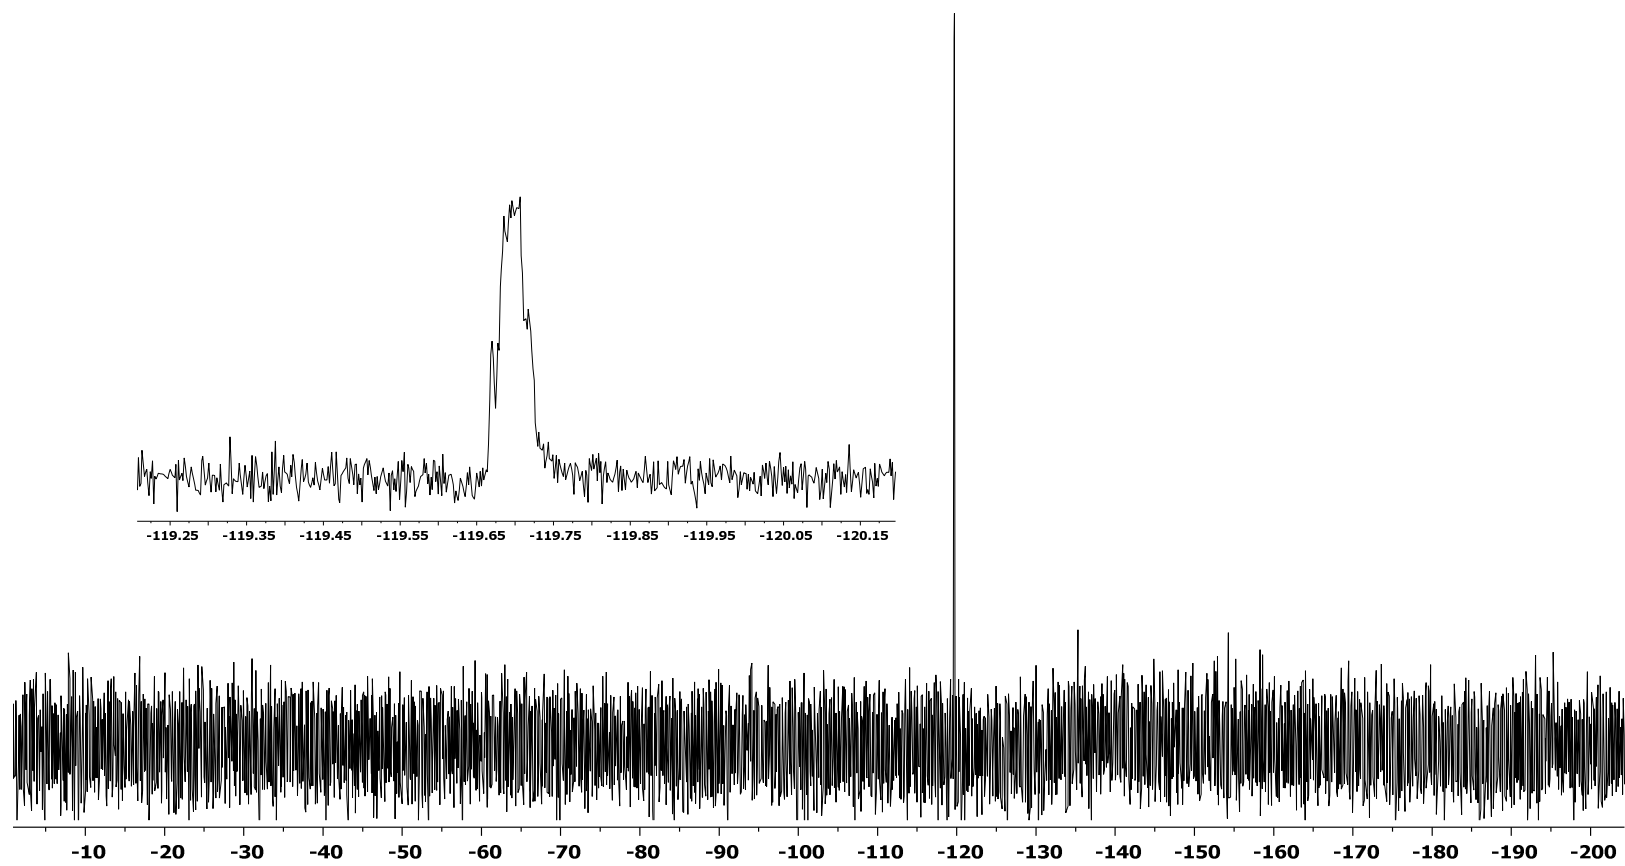

**Figure S30.**  $^{19}\text{F}$ -NMR spectrum of *ortho*-F-Pheol alamethicin F50 (**2**) in  $\text{CD}_3\text{OH}$  (recorded at 470 MHz).

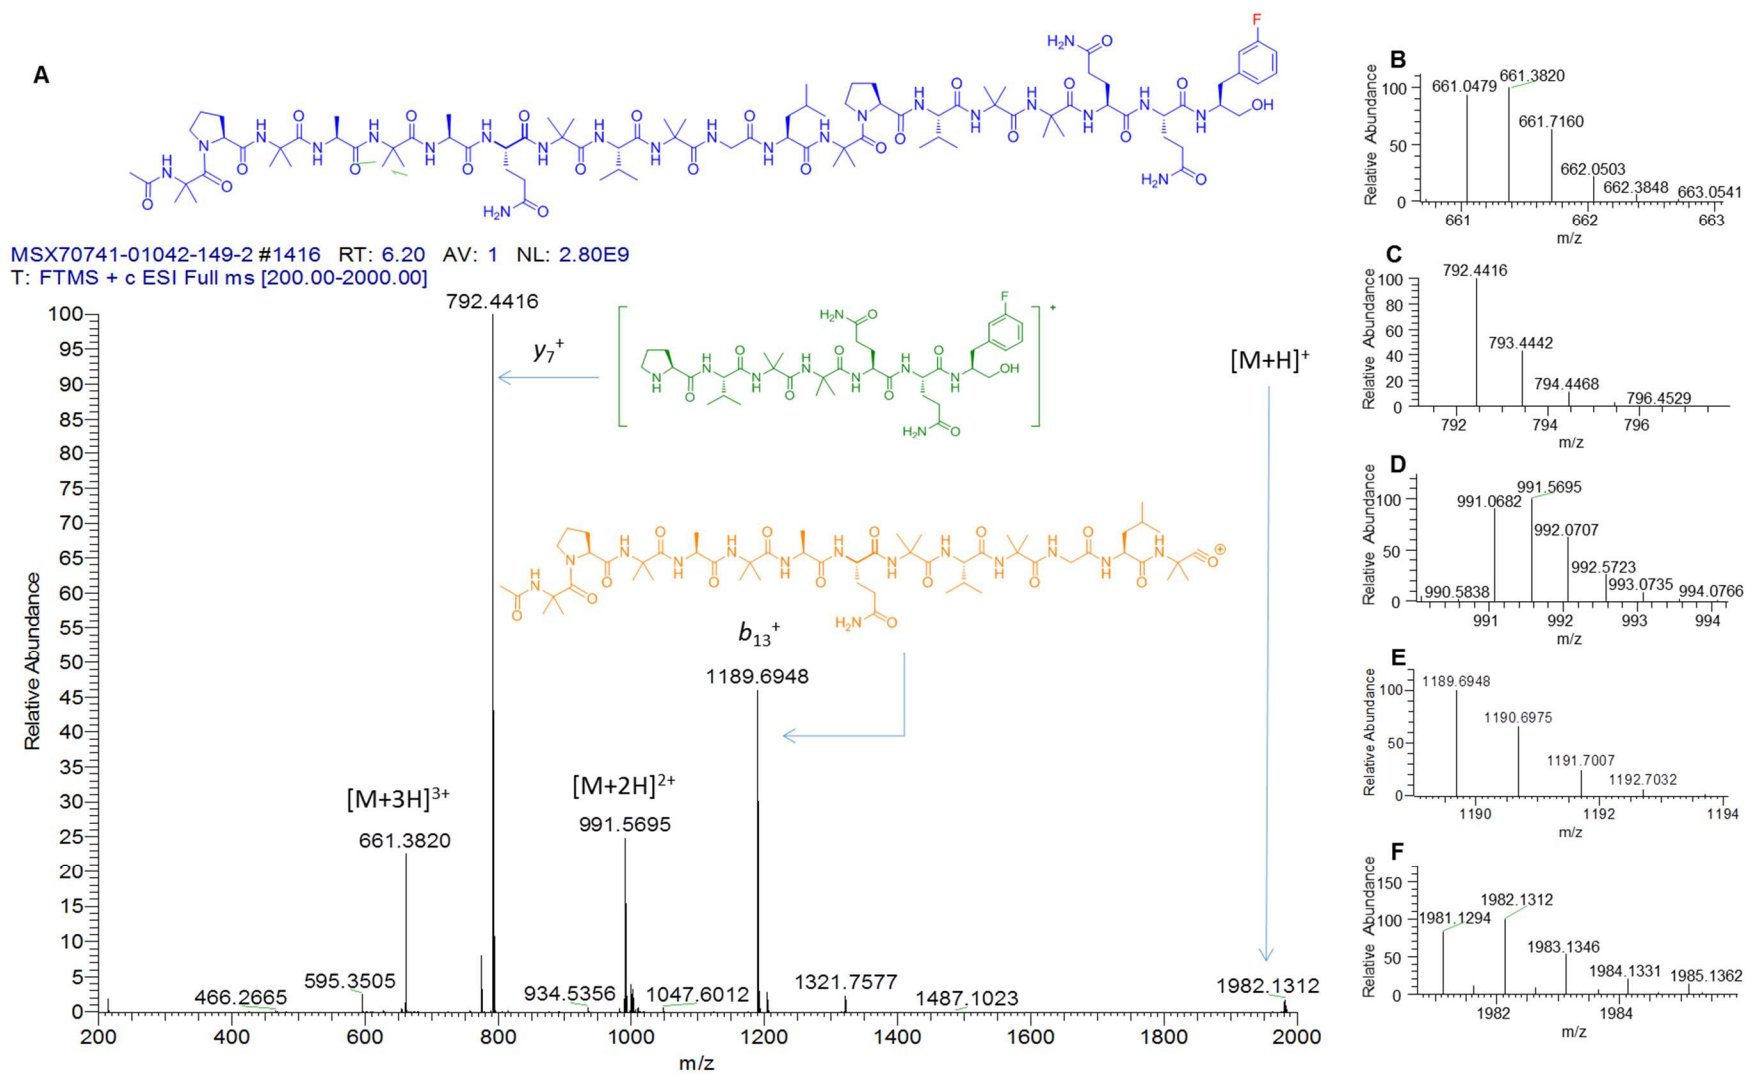

**Figure S31.** A) Full scan positive HRESIMS of *meta*-F-Pheol alamethicin F50 (**3**). B-F) Expansion of the  $[M+3H]^{3+}$ ,  $y_7^+$ ,  $[M+2H]^{2+}$ ,  $b_{13}^+$ , and  $[M+H]^+$  ion peaks, respectively.

MSX70741-01042-149-2 #1209-1785 RT: 4.23-6.16 AV: 24 NL: 2.57E7  
T: Average spectrum MS2 1189.69 (1209-1785)

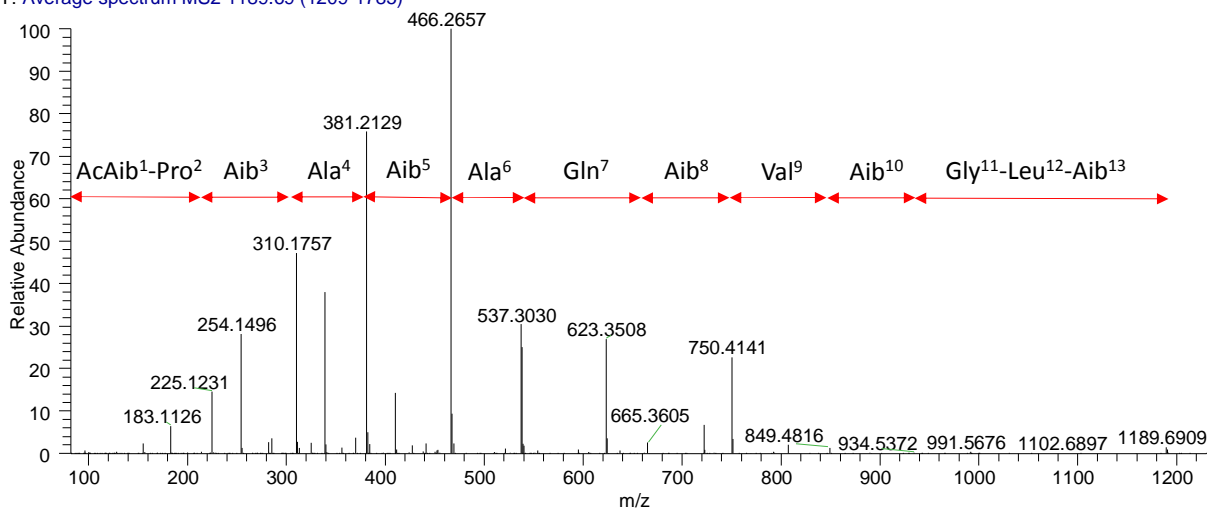

MSX70741-01042-149-2 #1313-1729 RT: 4.58-5.97 AV: 16 NL: 2.27E7  
T: Average spectrum MS2 991.09 (1313-1729)

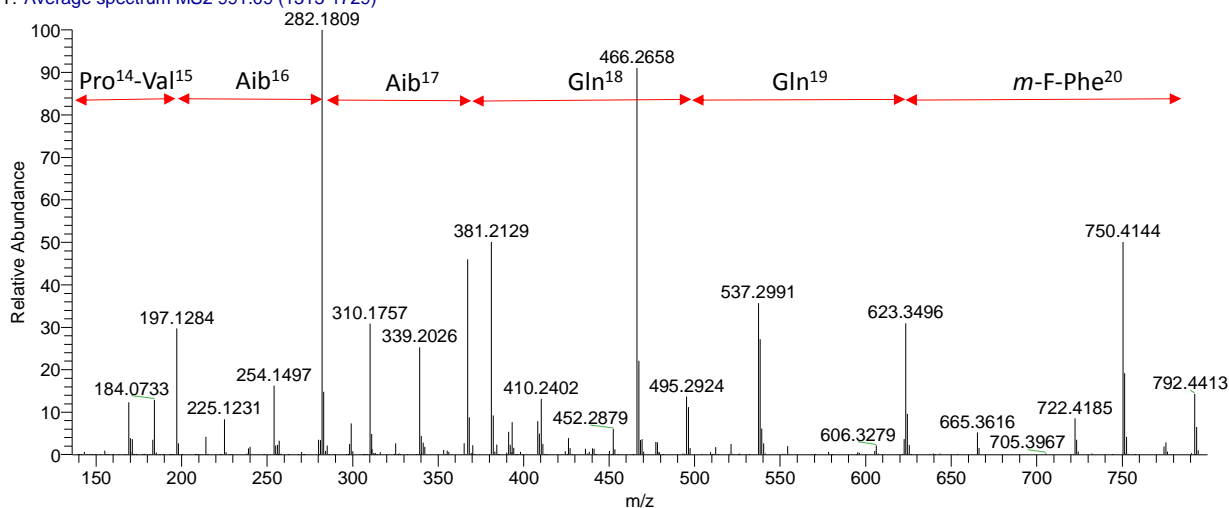

**Figure S32.** The sequential losses of amino acids for each in-source fragment at  $m/z$  1189.69 (top) and  $m/z$  792.44 generated from the  $[M+2H]^{2+}$  ion (bottom) for compound **3**.

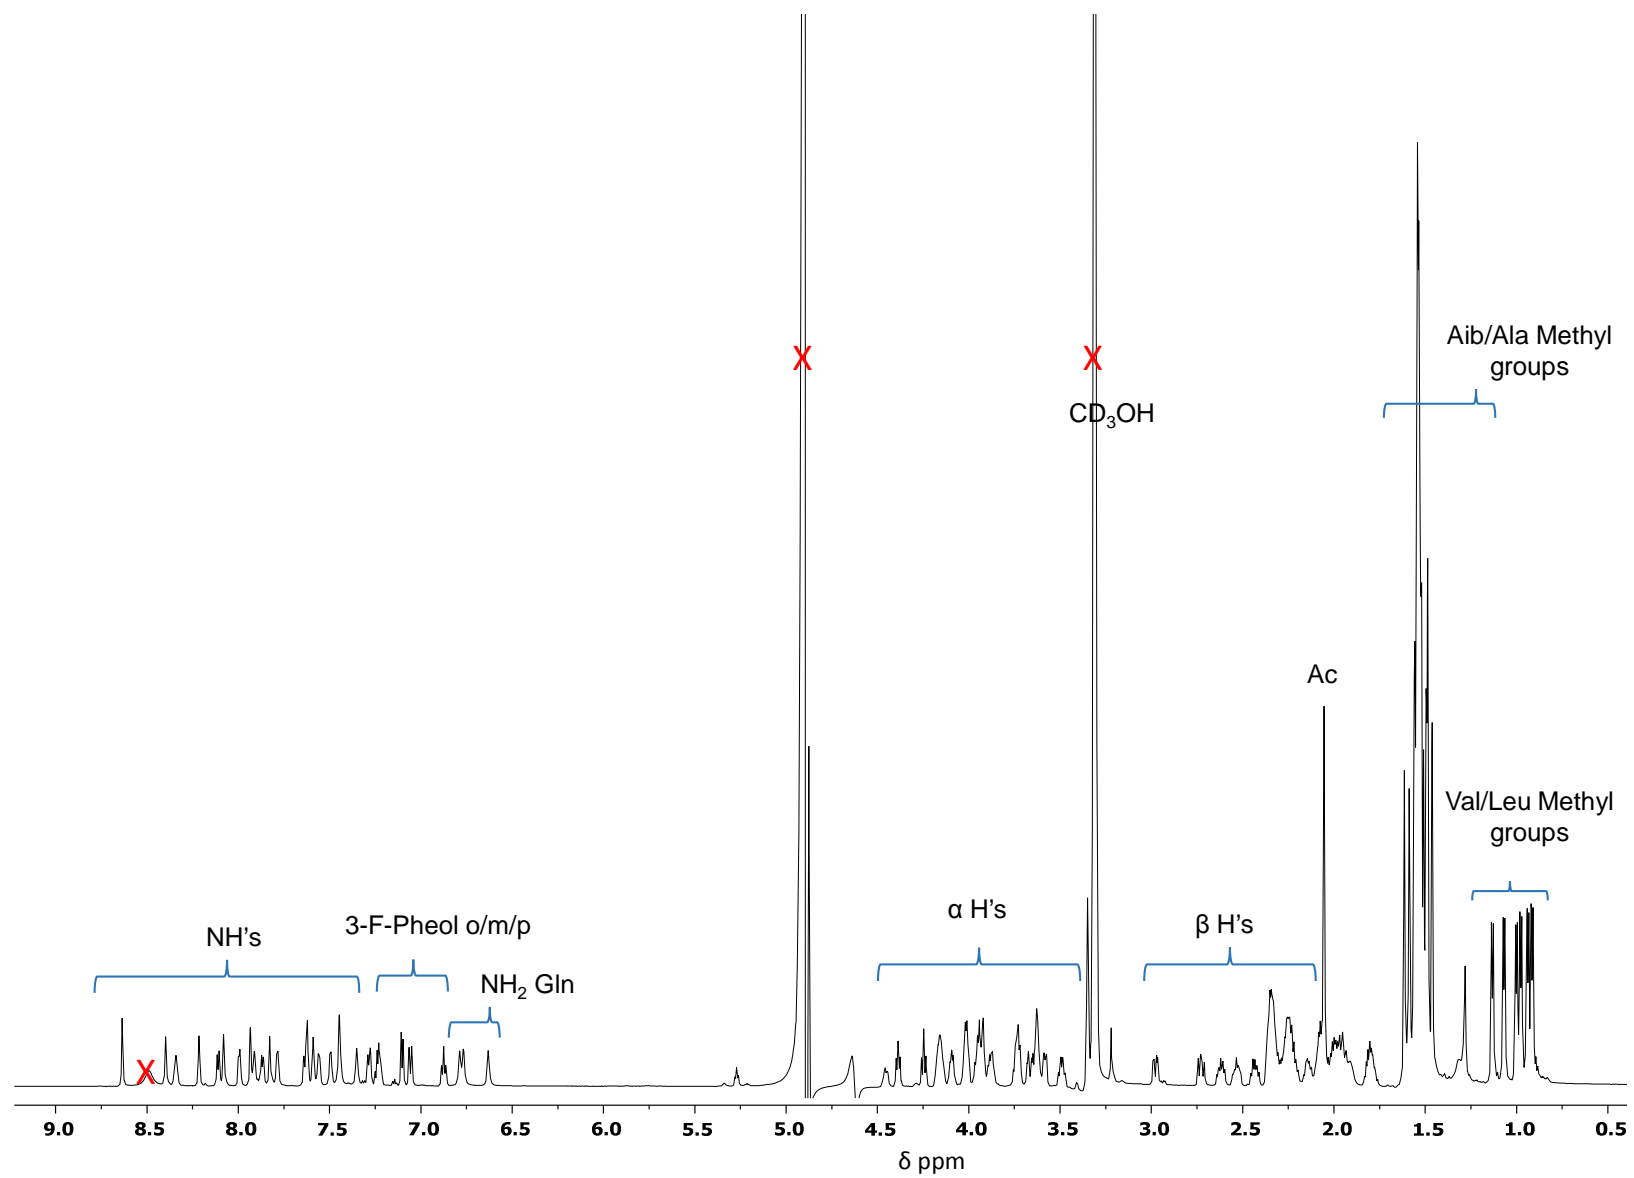

**Figure S33.** <sup>1</sup>H-NMR spectrum of *meta*-F-Pheol alamethicin F50 (3) in CD<sub>3</sub>OH (recorded at 700 MHz).

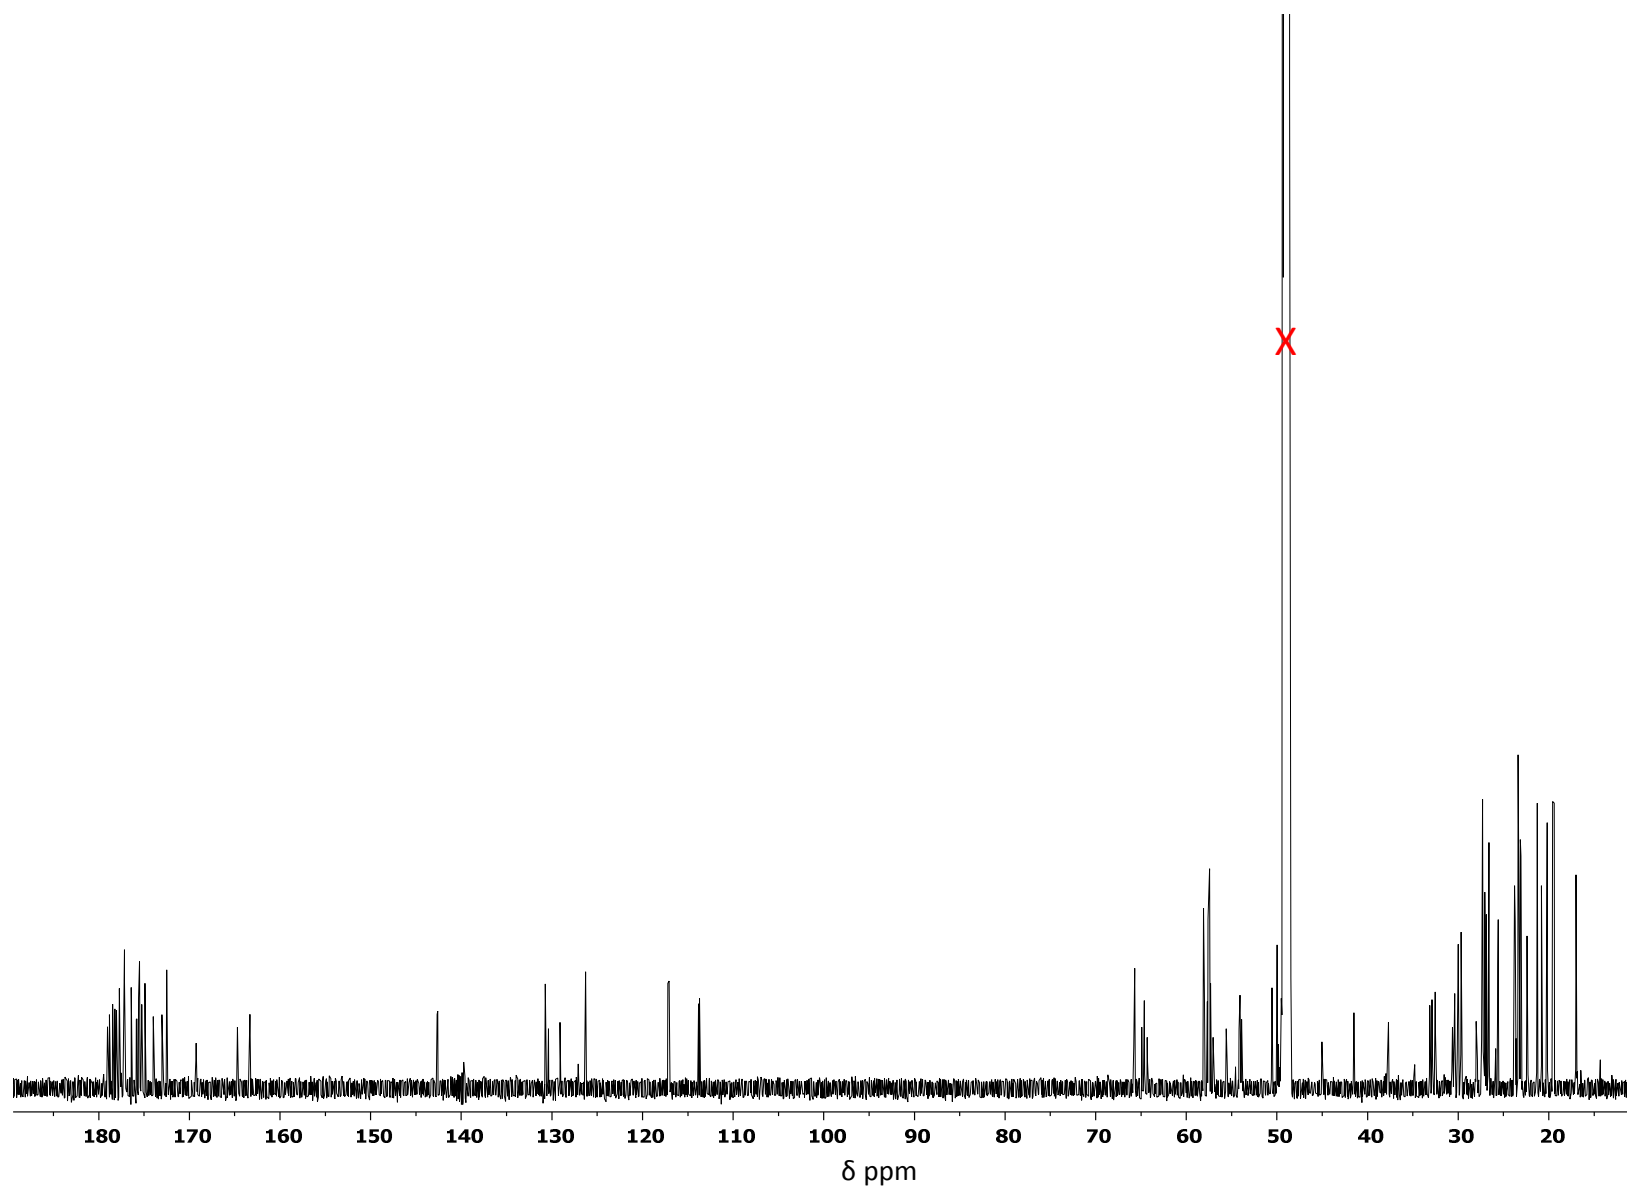

**Figure S34.**  $^{13}\text{C}$ -NMR spectrum of *meta*-F-Pheol alamethicin F50 (**3**) in  $\text{CD}_3\text{OH}$  (recorded at 175 MHz).



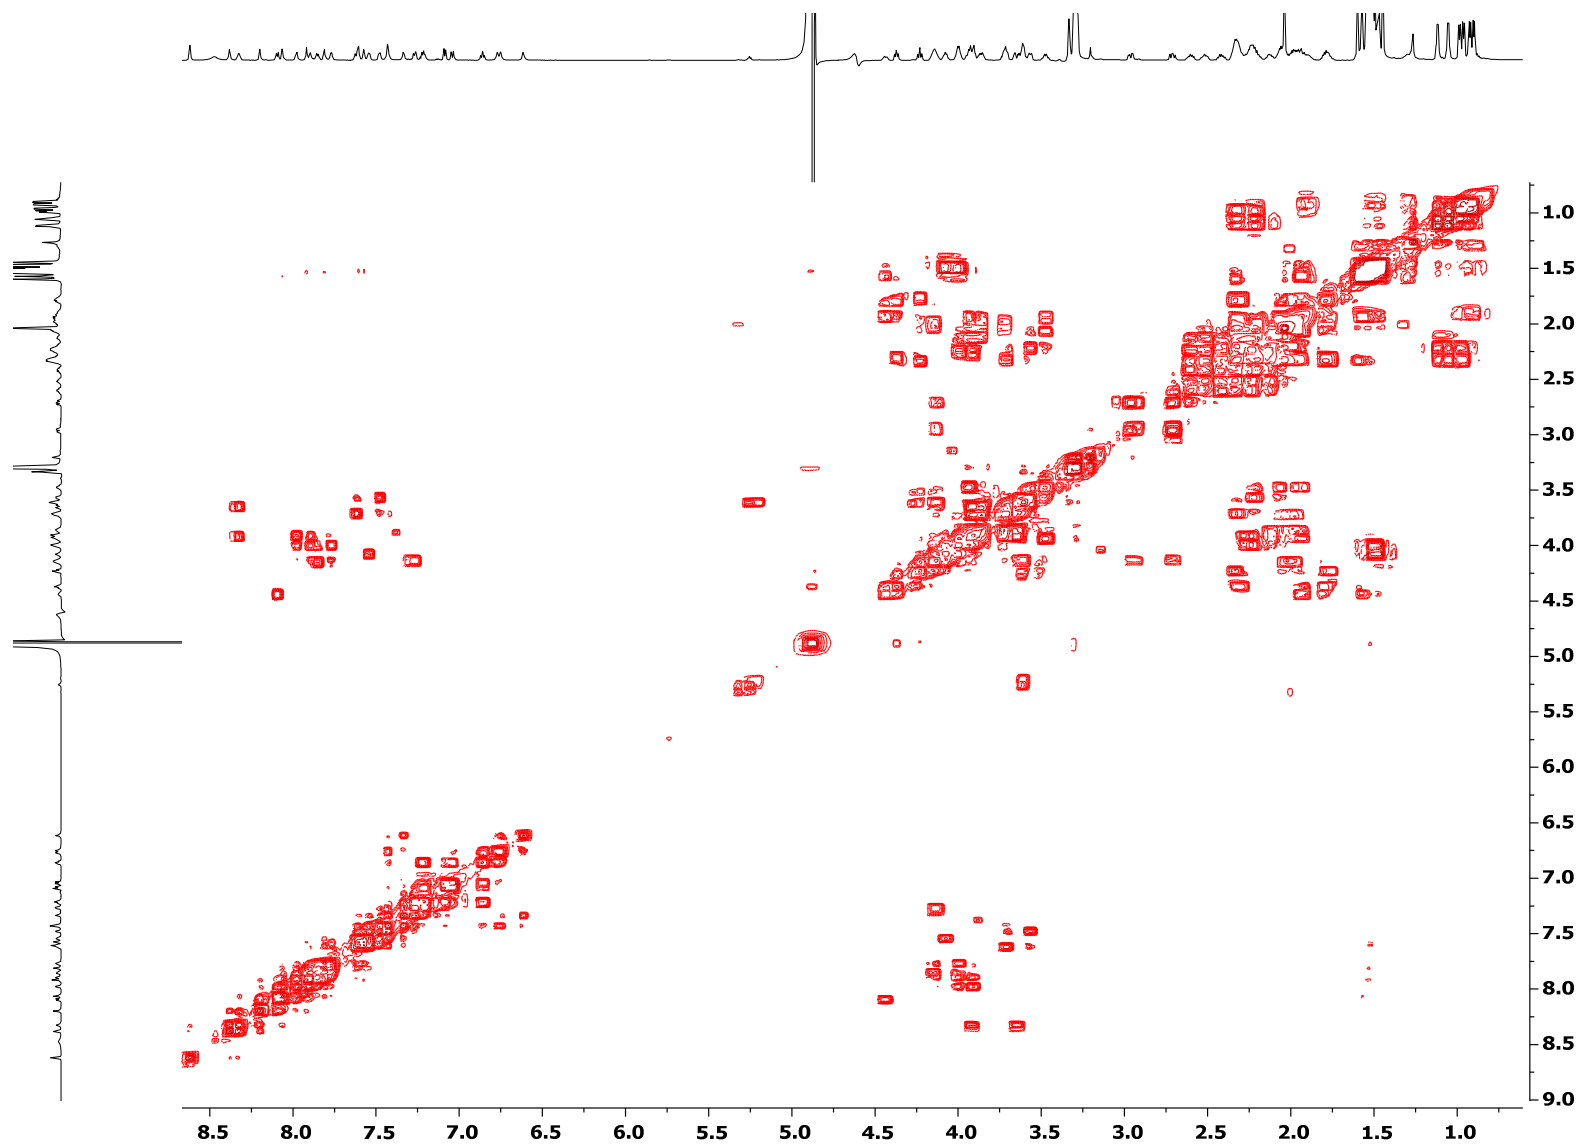

**Figure S35.**  $^1\text{H}$ - $^1\text{H}$  COSY of *meta*-F-Pheol alamethicin F50 (**3**) in  $\text{CD}_3\text{OH}$ .

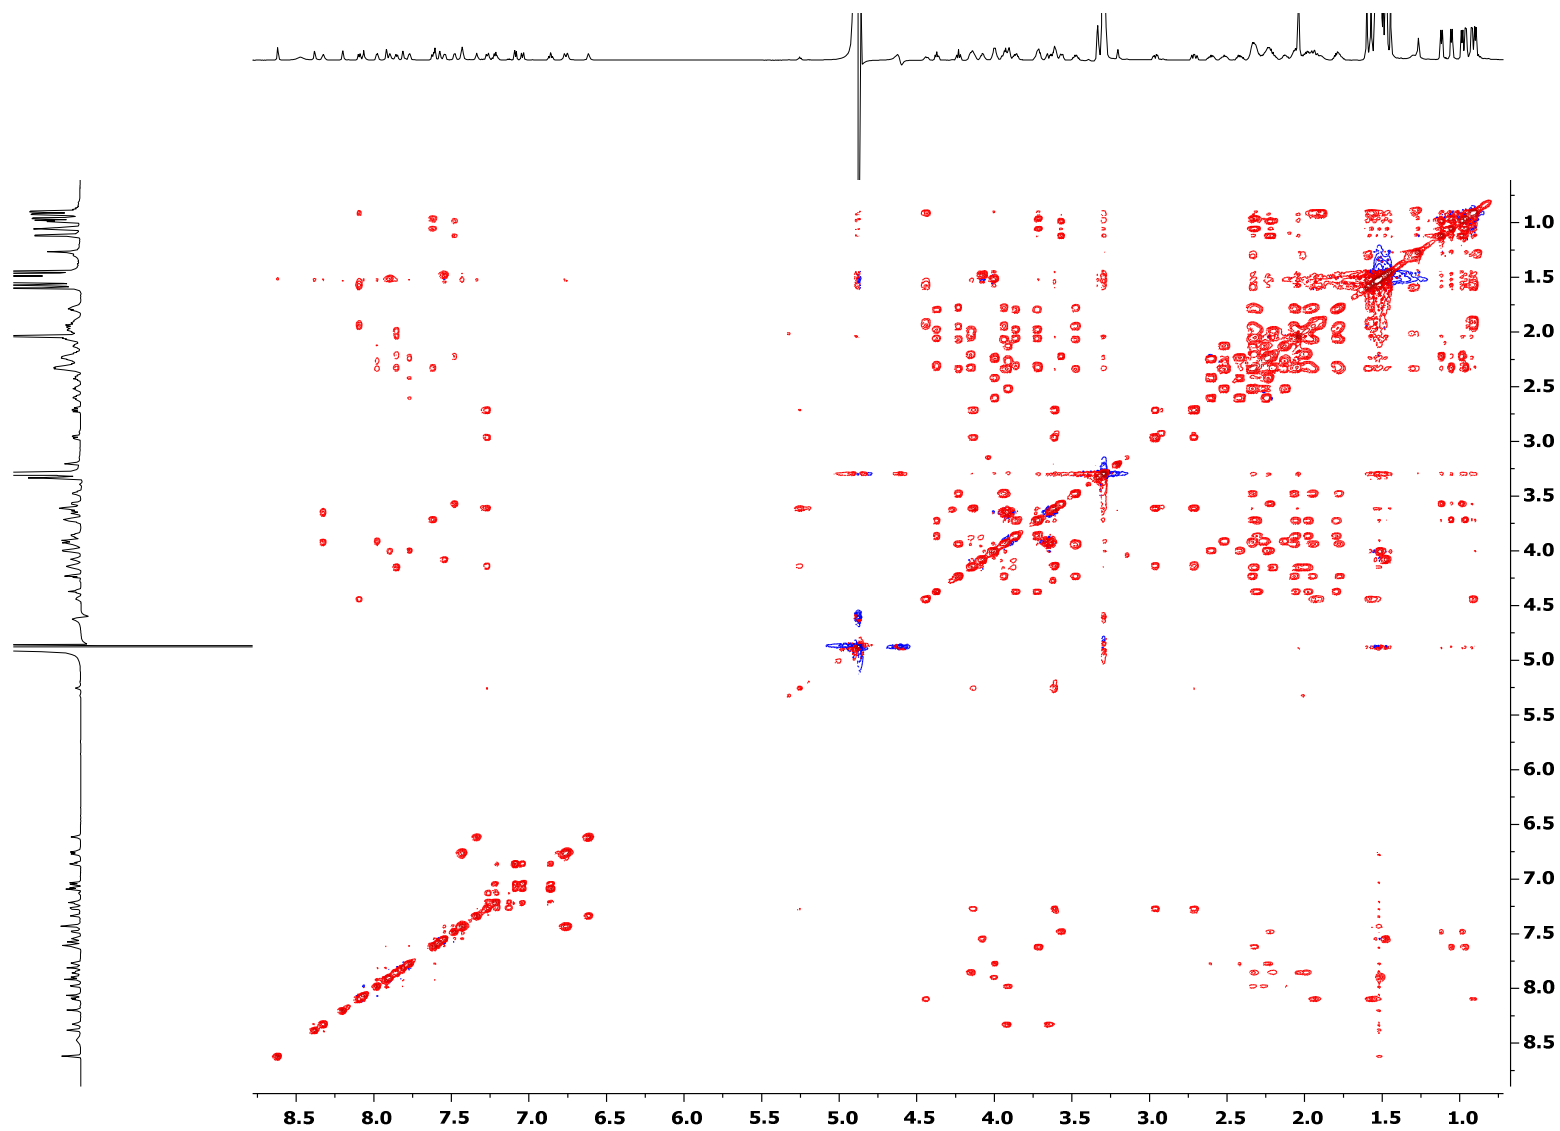

Figure S36.  $^1\text{H}$ - $^1\text{H}$  TOCSY of *meta*-F-Pheol alamethicin F50 (3) in  $\text{CD}_3\text{OH}$ .

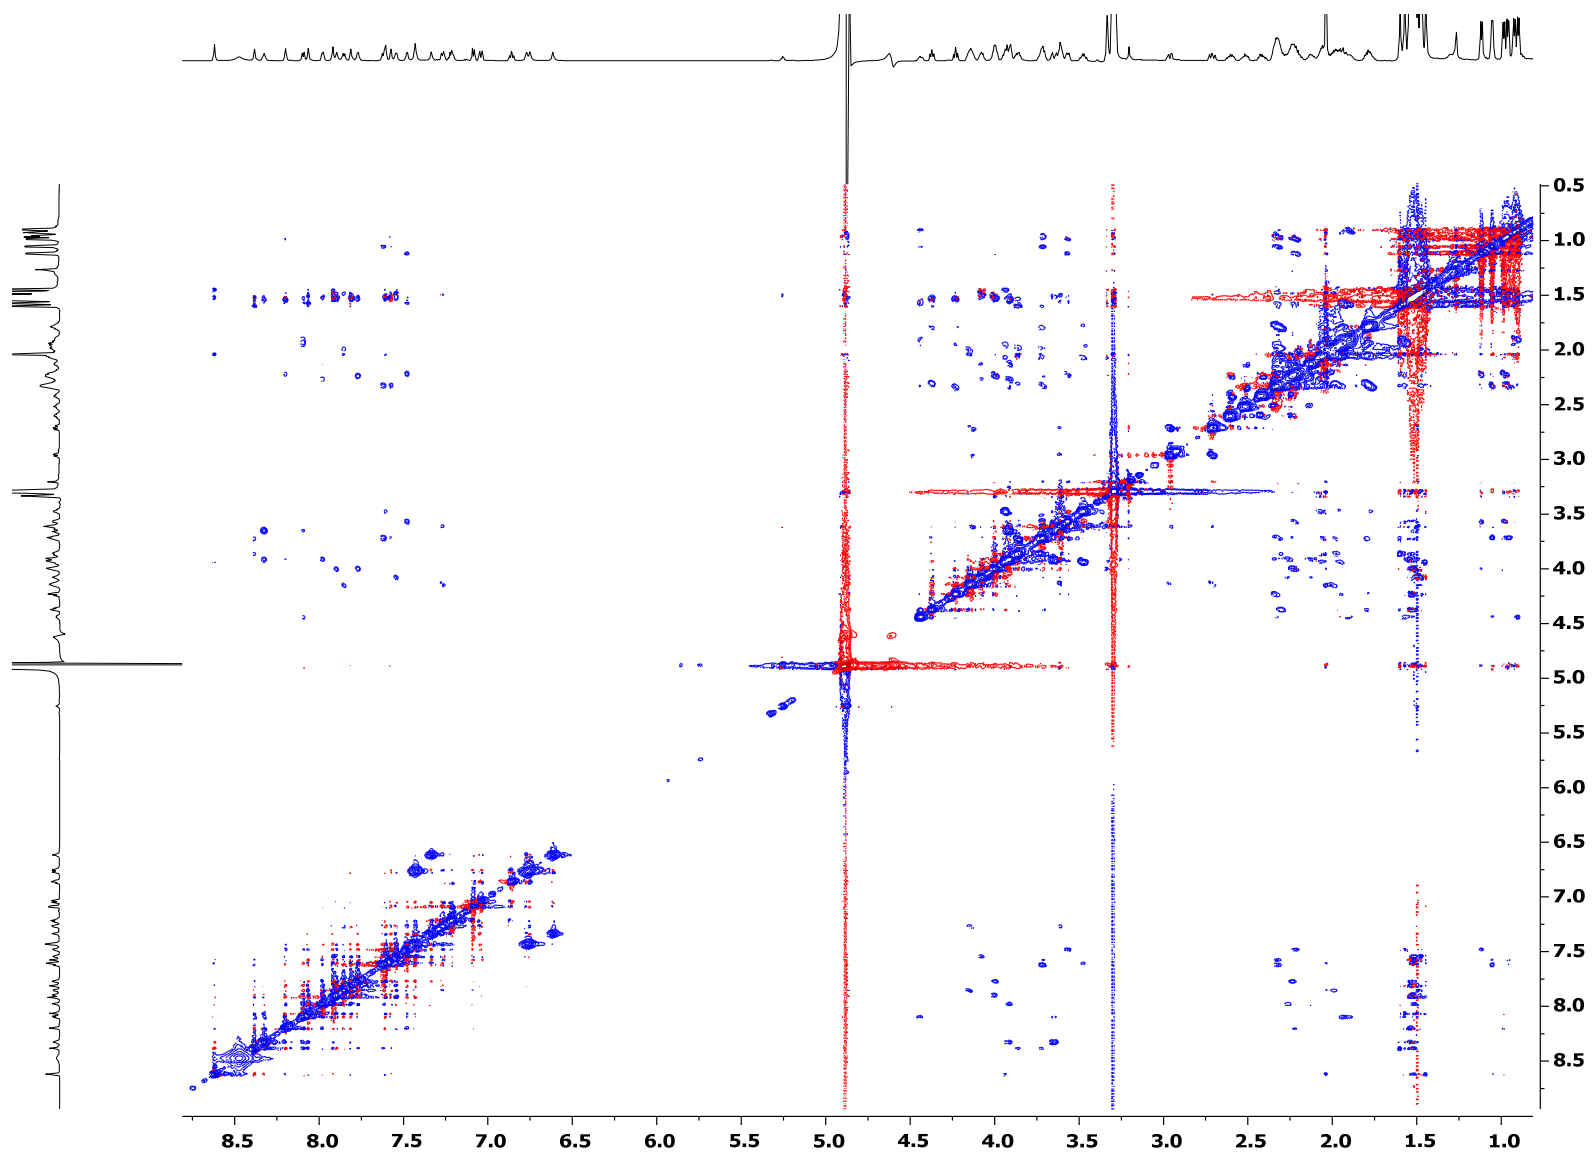

Figure S37.  $^1\text{H}$ - $^1\text{H}$  NOESY of *meta*-F-Pheol alamethicin F50 (3) in  $\text{CD}_3\text{OH}$ .

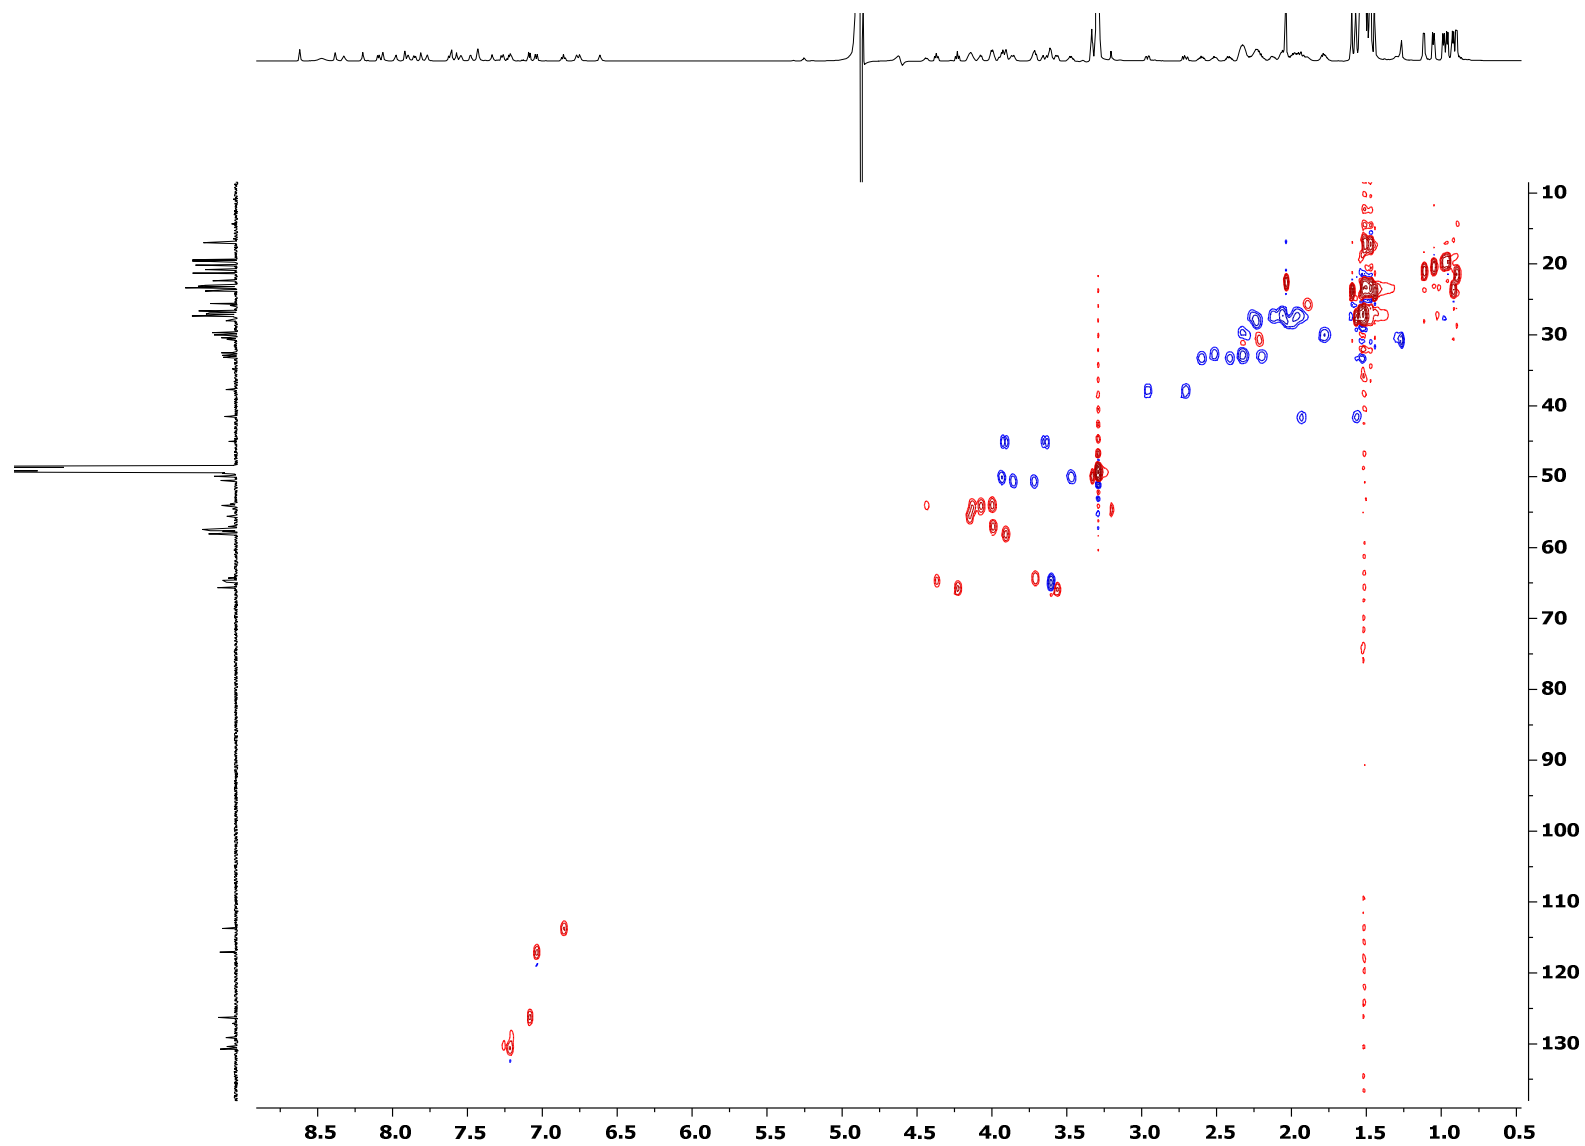

Figure S38.  $^1\text{H}$ - $^{13}\text{C}$  HSQC of *meta*-F-Pheol alamethicin F50 (3) in  $\text{CD}_3\text{OH}$ .

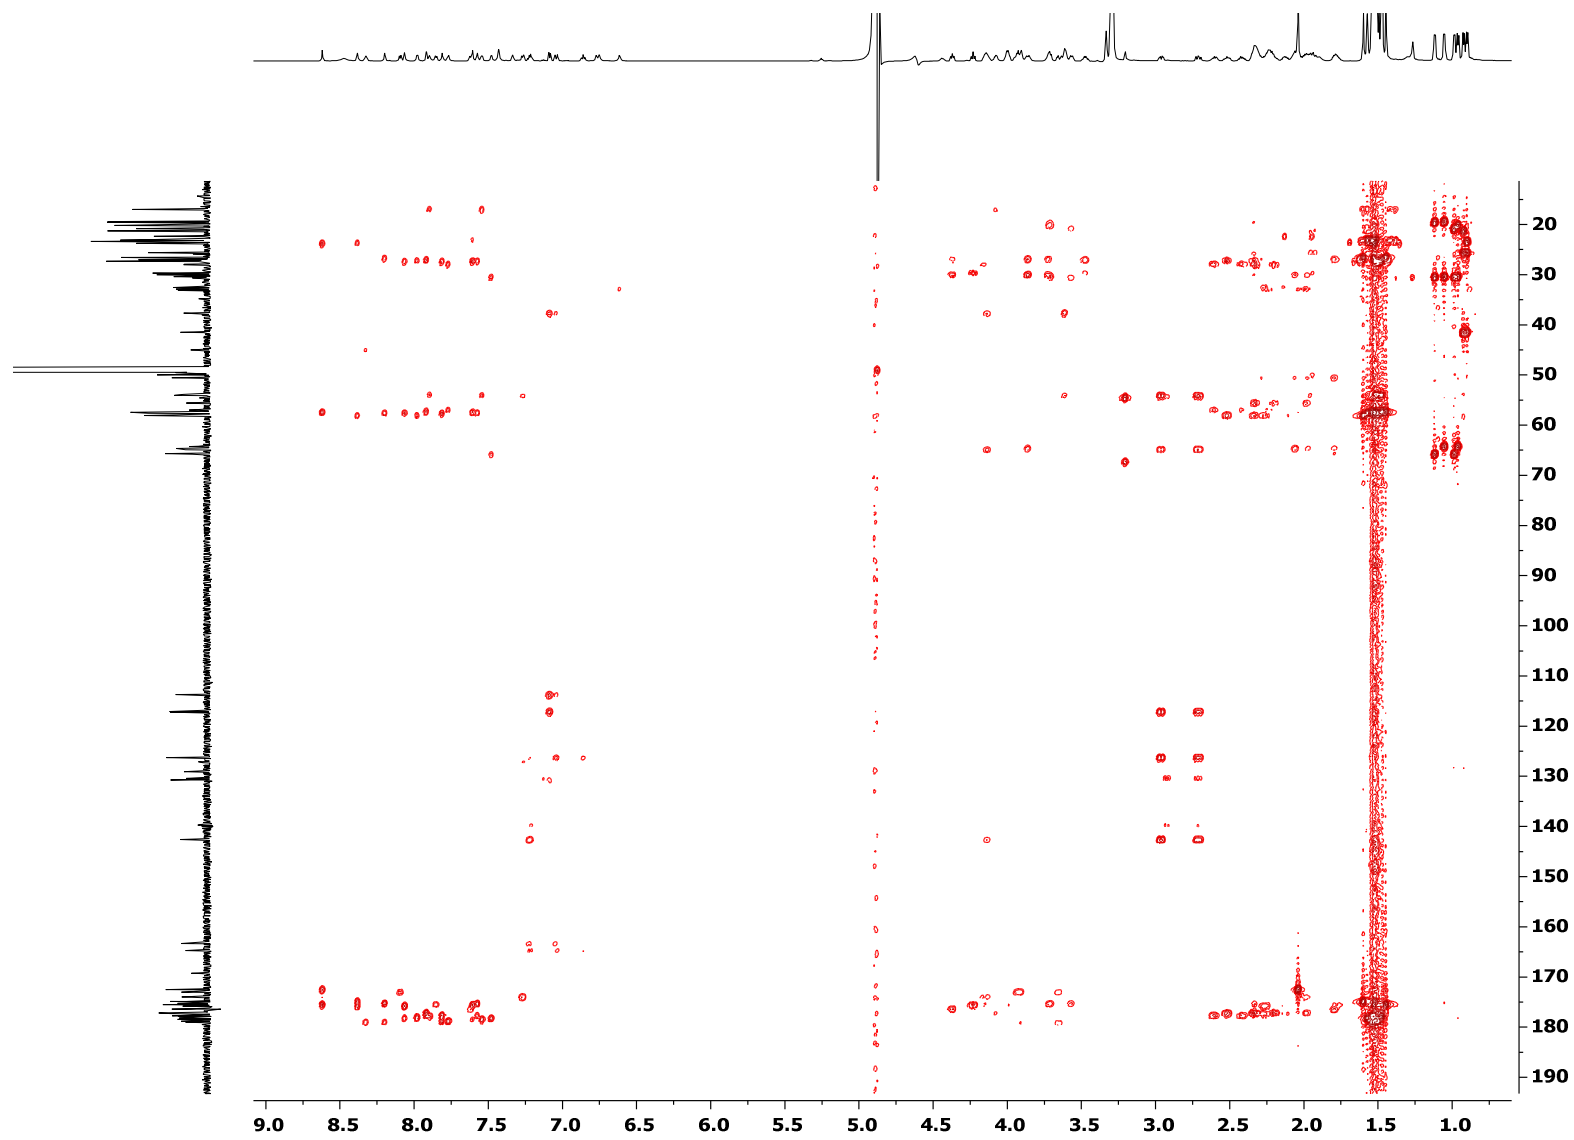

Figure S39.  $^1\text{H}$ - $^{13}\text{C}$  HMBC of *meta*-F-Pheol alamethicin F50 (**3**) in  $\text{CD}_3\text{OH}$ .

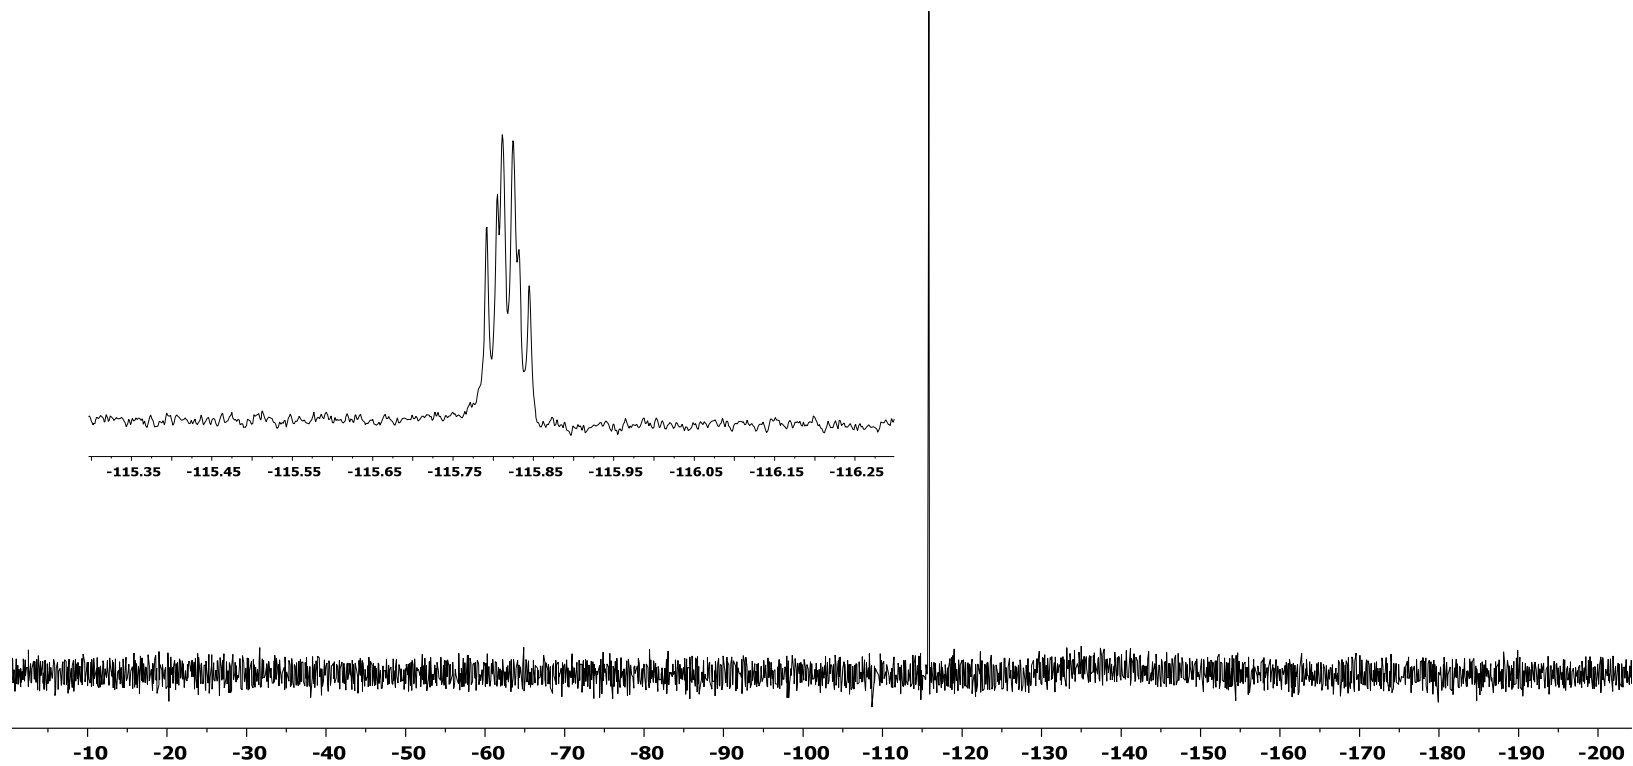

**Figure S40.**  $^{19}\text{F}$  NMR spectrum of *meta*-F-Pheol alamethicin F50 (**3**) in  $\text{CD}_3\text{OH}$  (recorded at 470 MHz).

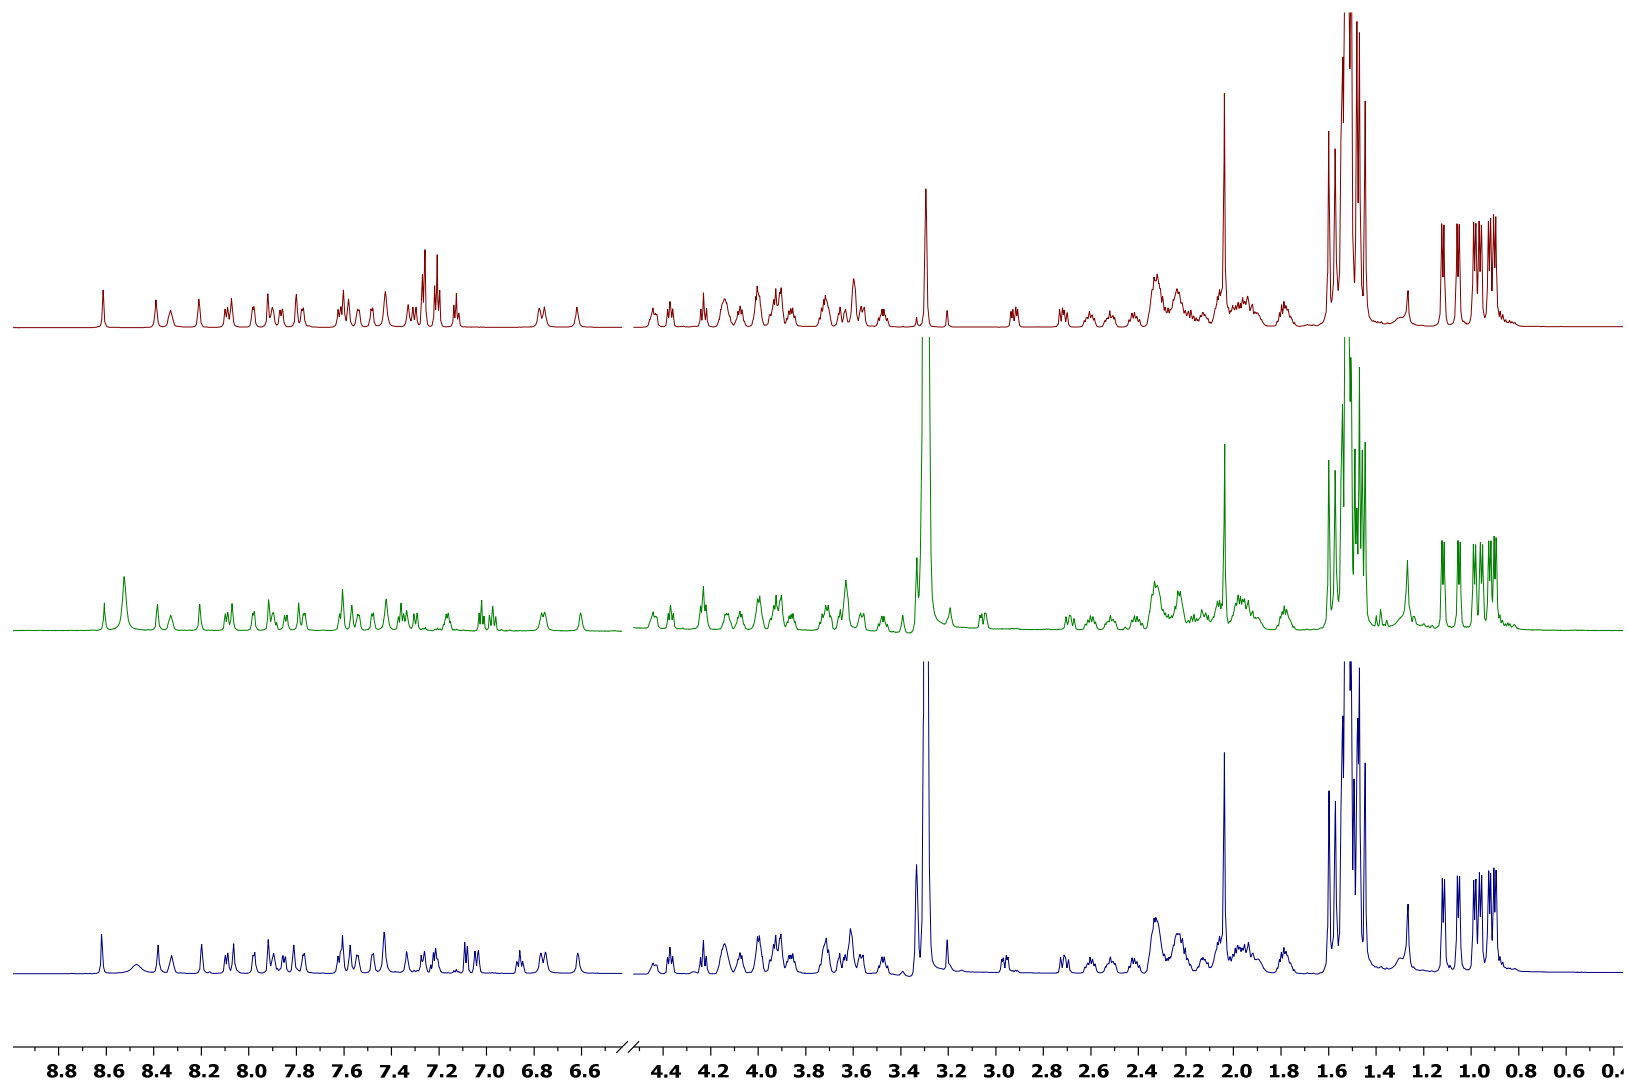

**Figure S41.** Comparison of the <sup>1</sup>H-NMR spectra for compounds **1** (maroon), **2** (green), and **3** (blue). Recorded at 700 MHz in CD<sub>3</sub>OH.

## References

- (1) Ayers, S.; Ehrmann, B. M.; Adcock, A. F.; Kroll, D. J.; Carcache de Blanco, E. J.; Shen, Q.; Swanson, S. M.; Falkinham, J. O., 3rd; Wani, M. C.; Mitchell, S. M.; Pearce, C. J.; Oberlies, N. H. *J. Pept. Sci.* **2012**, *18*, 500-510.
- (2) Degenkolb, T.; Dieckmann, R.; Nielsen, K. F.; Gräfenhan, T.; Theis, C.; Zafari, D.; Chaverri, P.; Ismaiel, A.; Brückner, H.; von Döhren, H.; Thrane, U.; Petrini, O.; Samuels, G. J. *Mycol. Prog.* **2008**, *7*, 177-219.
- (3) Jaklitsch, W. M.; Voglmayr, H. *Stud. Mycol.* **2015**, *80*, 1-87.
- (4) Schoch, C. L.; Robbertse, B.; Robert, V.; Vu, D.; Cardinali, G.; Irinyi, L.; Meyer, W.; Nilsson, R. H.; Hughes, K.; Miller, A. N.; Kirk, P. M.; Abarenkov, K.; Aime, M. C.; Ariyawansa, H. A.; Bidartondo, M.; Boekhout, T.; Buyck, B.; Cai, Q.; Chen, J.; Crespo, A.; Crous, P. W.; Damm, U.; De Beer, Z. W.; Dentinger, B. T.; Divakar, P. K.; Duenas, M.; Feau, N.; Fliegerova, K.; Garcia, M. A.; Ge, Z. W.; Griffith, G. W.; Groenewald, J. Z.; Groenewald, M.; Grube, M.; Gryzenhout, M.; Gueidan, C.; Guo, L.; Hambleton, S.; Hamelin, R.; Hansen, K.; Hofstetter, V.; Hong, S. B.; Houbroken, J.; Hyde, K. D.; Inderbitzin, P.; Johnston, P. R.; Karunarathna, S. C.; Koljalg, U.; Kovacs, G. M.; Kraichak, E.; Krizsan, K.; Kurtzman, C. P.; Larsson, K. H.; Leavitt, S.; Letcher, P. M.; Liimatainen, K.; Liu, J. K.; Lodge, D. J.; Luangsa-ard, J. J.; Lumbsch, H. T.; Maharachchikumbura, S. S.; Manamgoda, D.; Martin, M. P.; Minnis, A. M.; Moncalvo, J. M.; Mule, G.; Nakasone, K. K.; Niskanen, T.; Olariaga, I.; Papp, T.; Petkovits, T.; Pino-Bodas, R.; Powell, M. J.; Raja, H. A.; Redecker, D.; Sarmiento-Ramirez, J. M.; Seifert, K. A.; Shrestha, B.; Stenroos, S.; Stielow, B.; Suh, S. O.; Tanaka, K.; Tedersoo, L.; Telleria, M. T.; Udayanga, D.; Untereiner, W. A.; Dieguez Uribeondo, J.; Subbarao, K. V.; Vagvolgyi, C.; Visagie, C.; Voigt, K.; Walker, D. M.; Weir, B. S.; Weiss, M.; Wijayawardene, N. N.; Wingfield, M. J.; Xu, J. P.; Yang, Z. L.; Zhang, N.; Zhuang, W. Y. *Database (Oxford)* **2014**, *2014*.
- (5) White, T., 1 T. Lee S., and Tylor J.; Academic Press, I., Ed. San Diego California **1990**, p 315-322.
- (6) Carbone, I.; Kohn, L. M. *Mycologia.* **1999**, *91*, 553-556.
- (7) Jaklitsch, W. M.; Komon, M.; Kubicek, C. P.; Druzhinina, I. S. *Mycologia.* **2006**, *98*, 499-513.
- (8) Liu, Y. J.; Hall, B. D. *Proc. Natl. Acad. Sci. U. S. A.* **2004**, *101*, 4507-4512.
- (9) Schoch, C. L.; Seifert, K. A.; Huhndorf, S.; Robert, V.; Spouge, J. L.; Levesque, C. A.; Chen, W.; Consortium, F. B. *Proc. Natl. Acad. Sci. U. S. A.* **2012**, *109*, 6241-6246.
- (10) Druzhinina, I. S.; Kopchinskiy, A. G.; Komon, M.; Bissett, J.; Szakacs, G.; Kubicek, C. P. *Fungal. Genet. Biol.* **2005**, *42*, 813-828.
- (11) Bissett, J.; Gams, W.; Jaklitsch, W.; Samuels, G. J. *IMA Fungus* **2015**, *6*, 263-295.
- (12) Elike Lieckfeldt, K. A. S. *Stud. Mycol.* **2000**, *45*, 35-44.
- (13) Rehner, S. A.; Buckley, E. *Mycologia.* **2005**, *97*, 84-98.
- (14) Edgar, R. C. *Nucleic Acids Res.* **2004**, *32*, 1792-1797.
- (15) Liu, Y. J.; Whelen, S.; Hall, B. D. *Mol. Biol. Evol.* **1999**, *16*, 1799-1808.
- (16) Stamatakis, A. *Bioinformatics.* **2006**, *22*, 2688-2690.
- (17) Miller, M. A.; Pfeiffer, W.; Schwartz, T. In *Proceedings of the 2011 TeraGrid Conference: Extreme Digital Discovery*; ACM: Salt Lake City, Utah, 2011, p 1-8.
